# Supplementary material
Source: PubMed Central journal article supplement (PMC2878377)

# **A Highly Convergent Approach toward (-)-Brevenal**

Michael T. Crimmins,\* Mariam Shamszad, and Anita E. Mattson

*Kenan and Caudill Laboratories of Chemistry  
University of North Carolina at Chapel Hill  
Chapel Hill, NC 27599*

crimmins@email.unc.edu

**Supporting Information: H<sup>1</sup> and C<sup>13</sup> NMR Spectra**

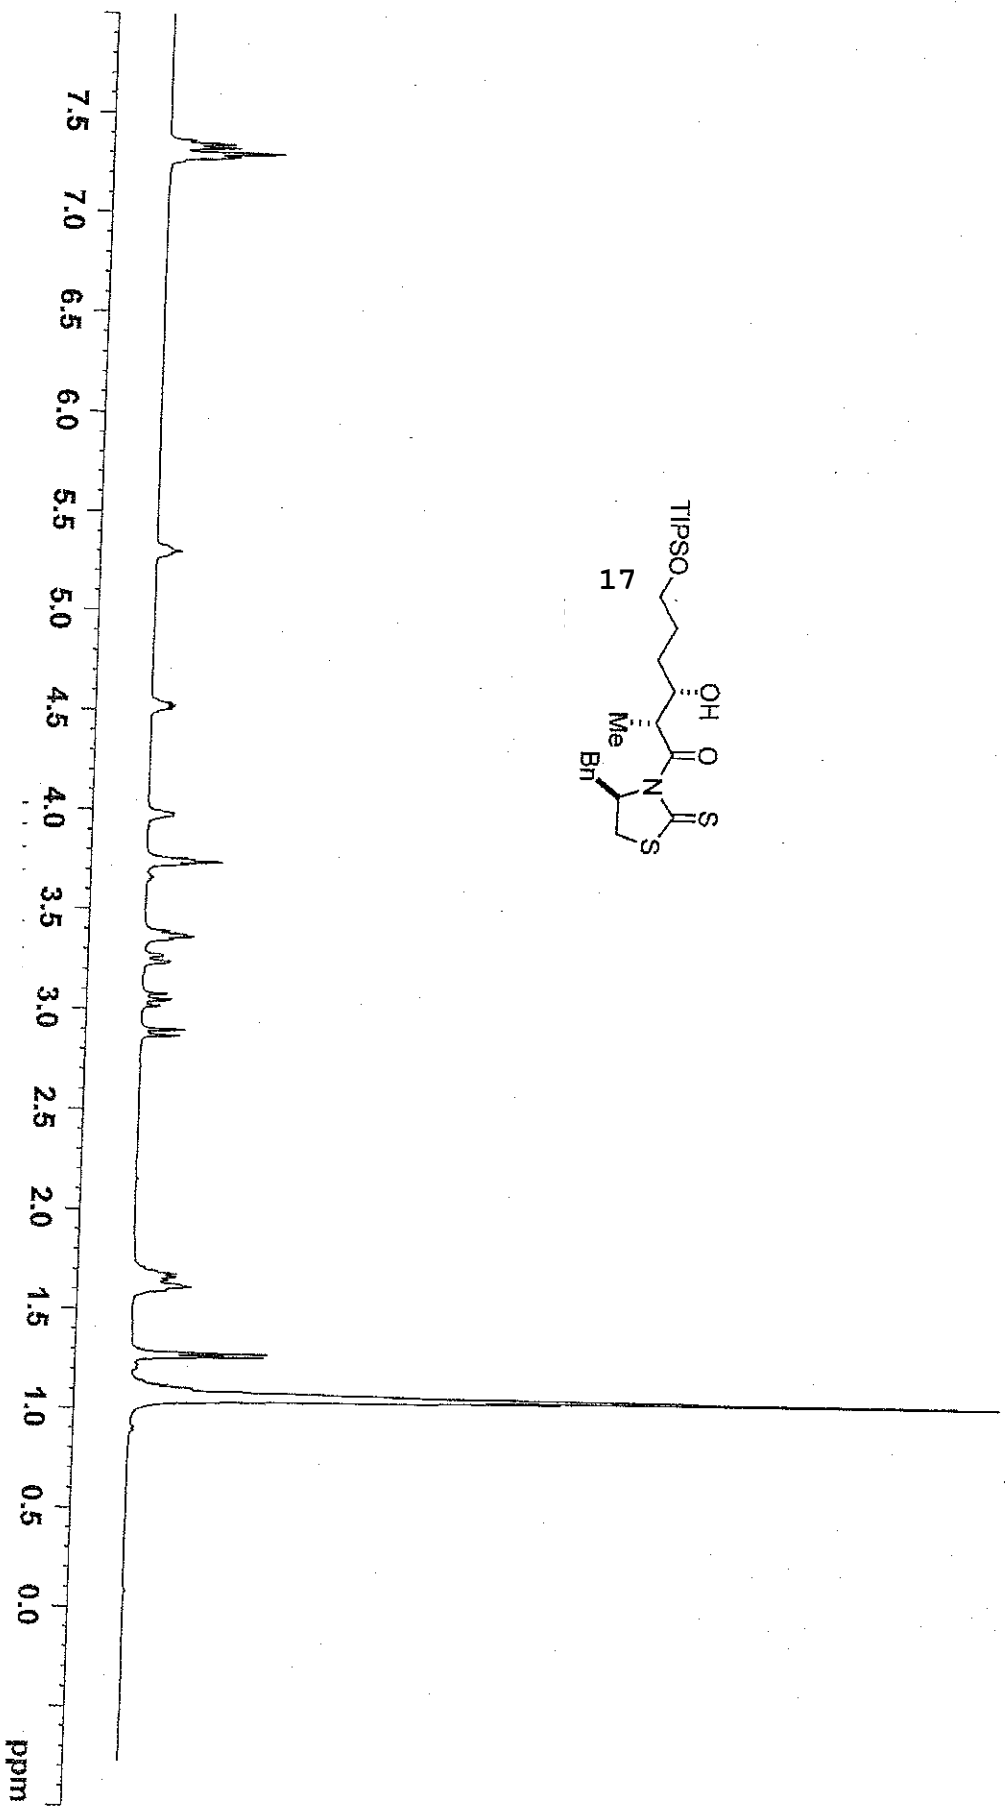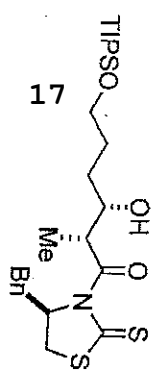

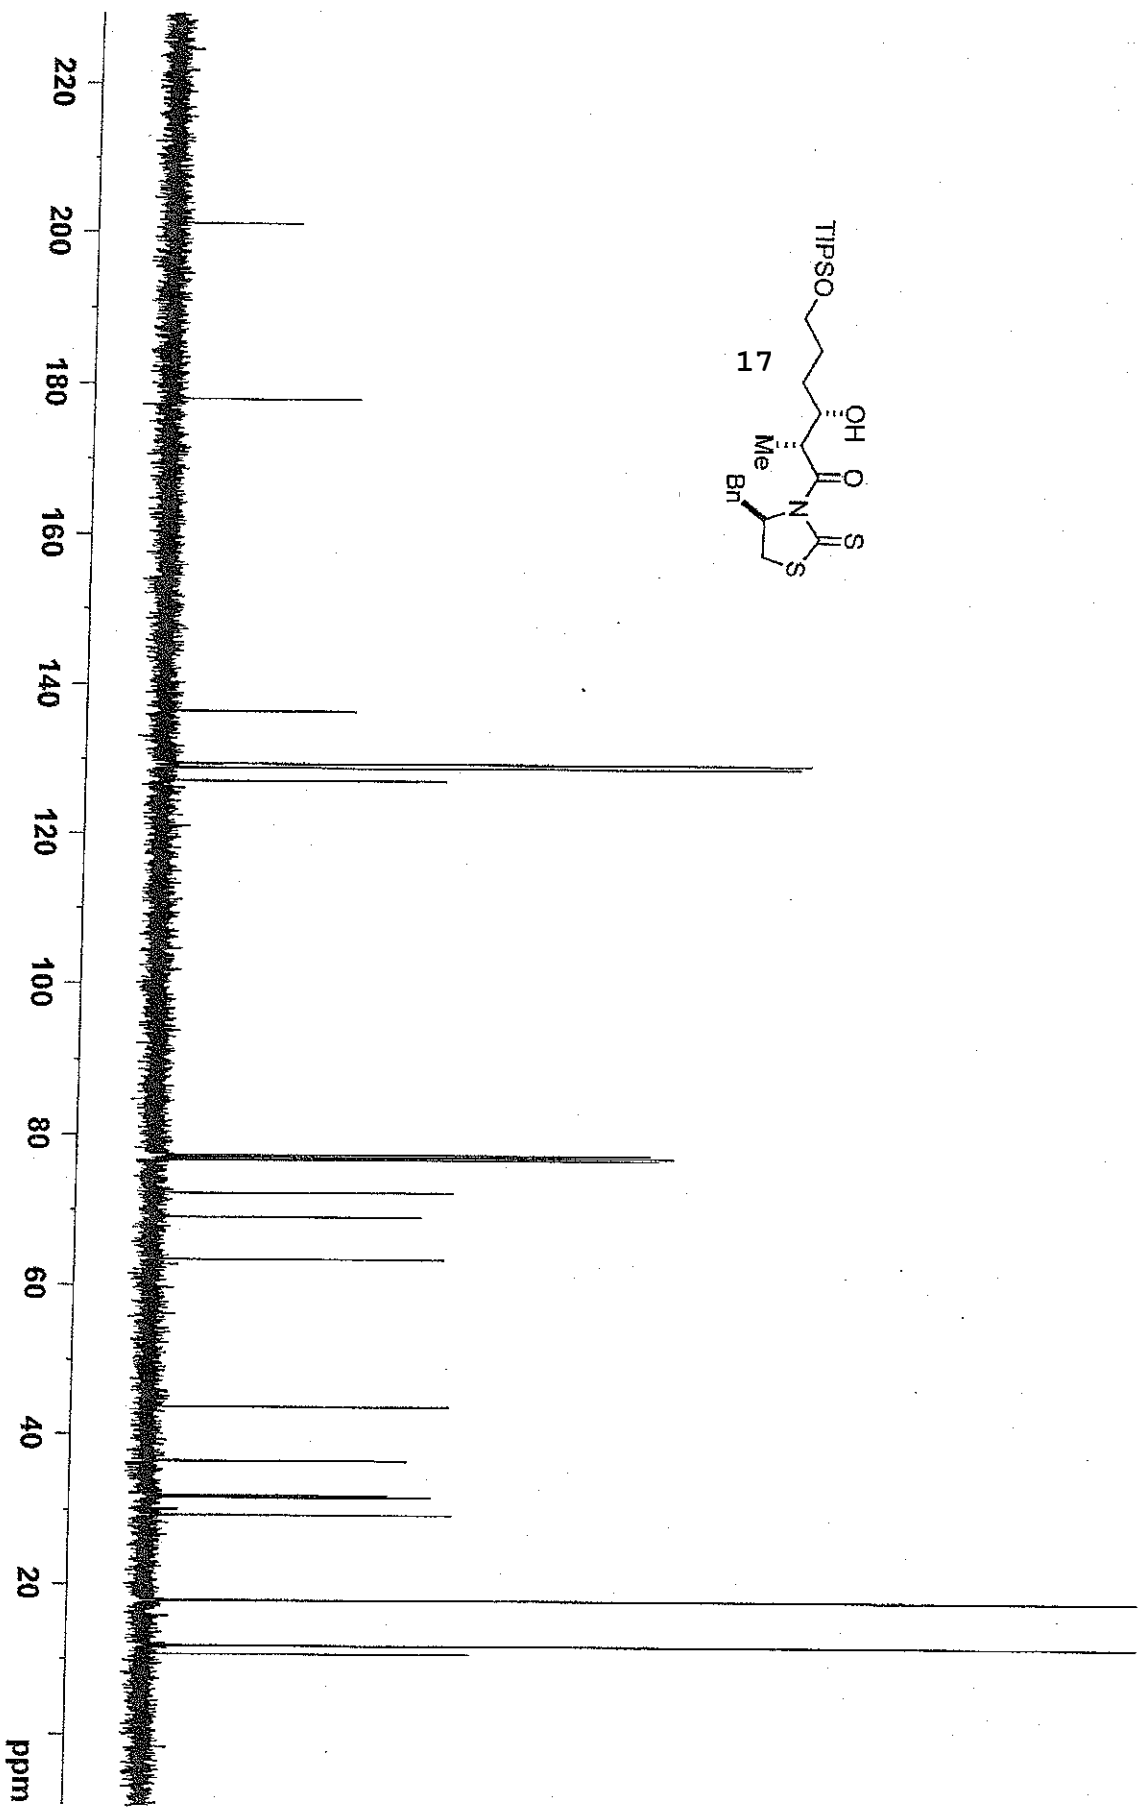

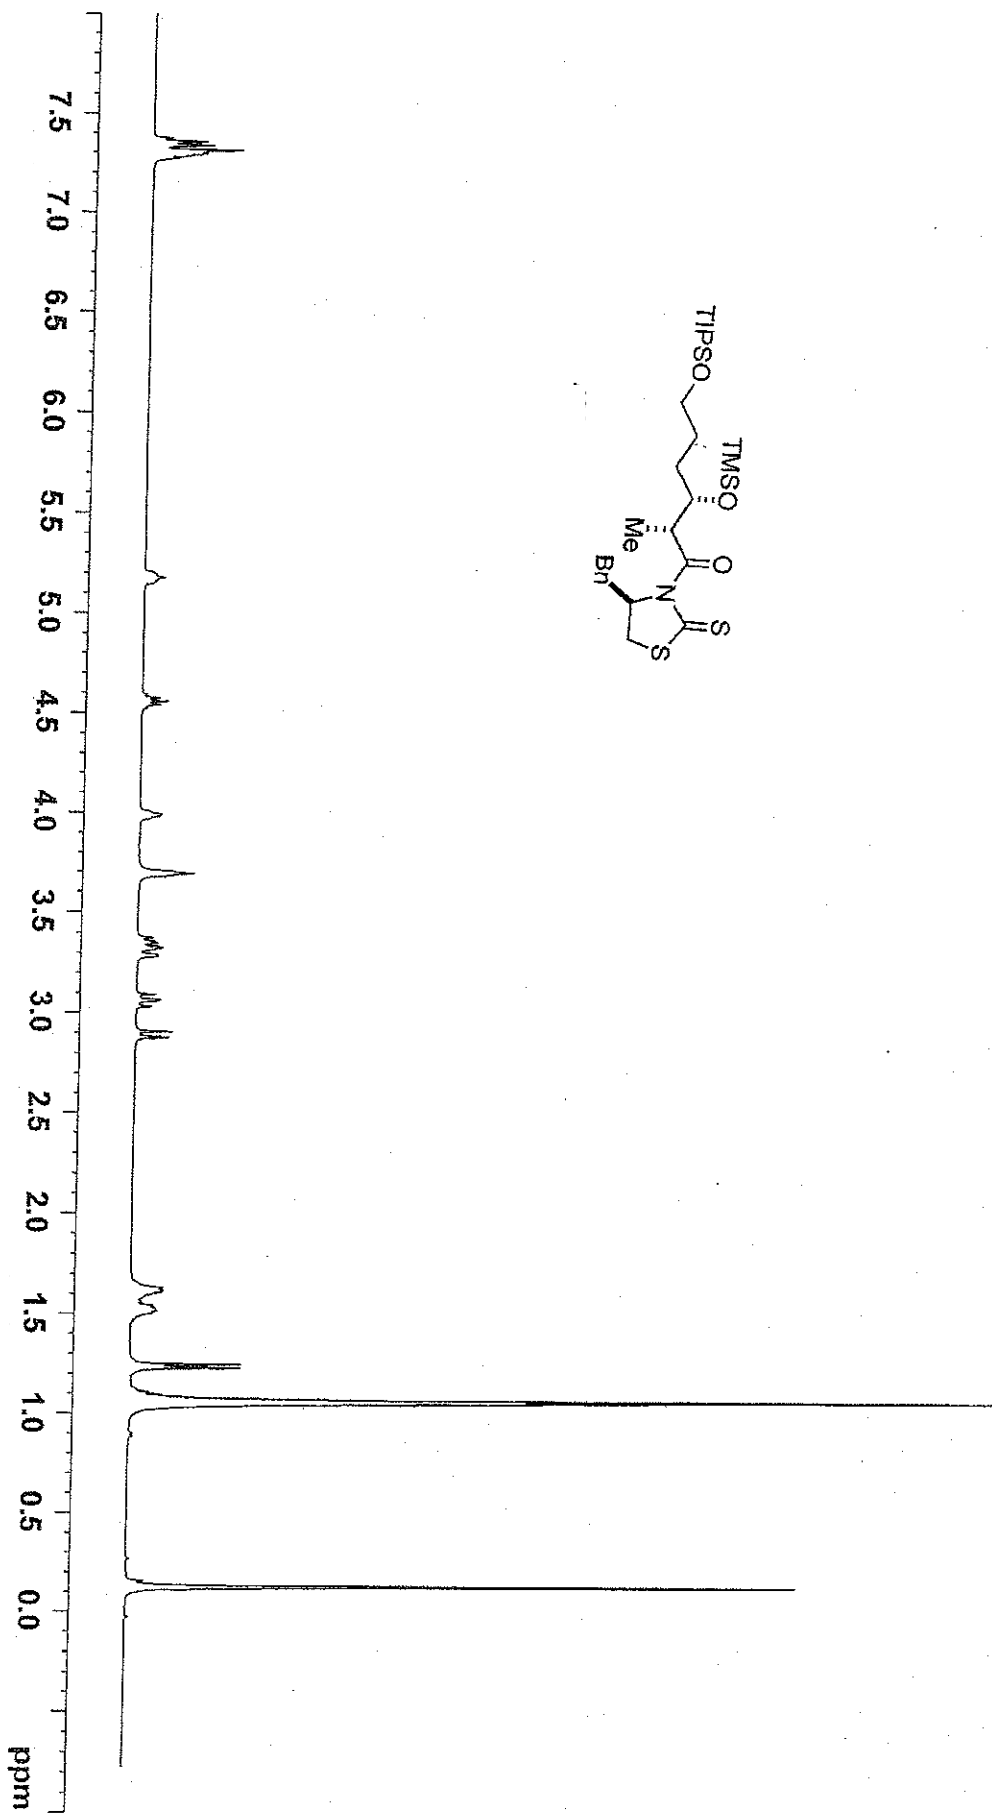

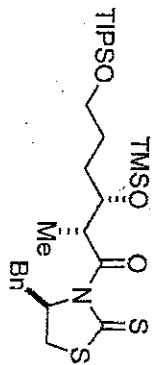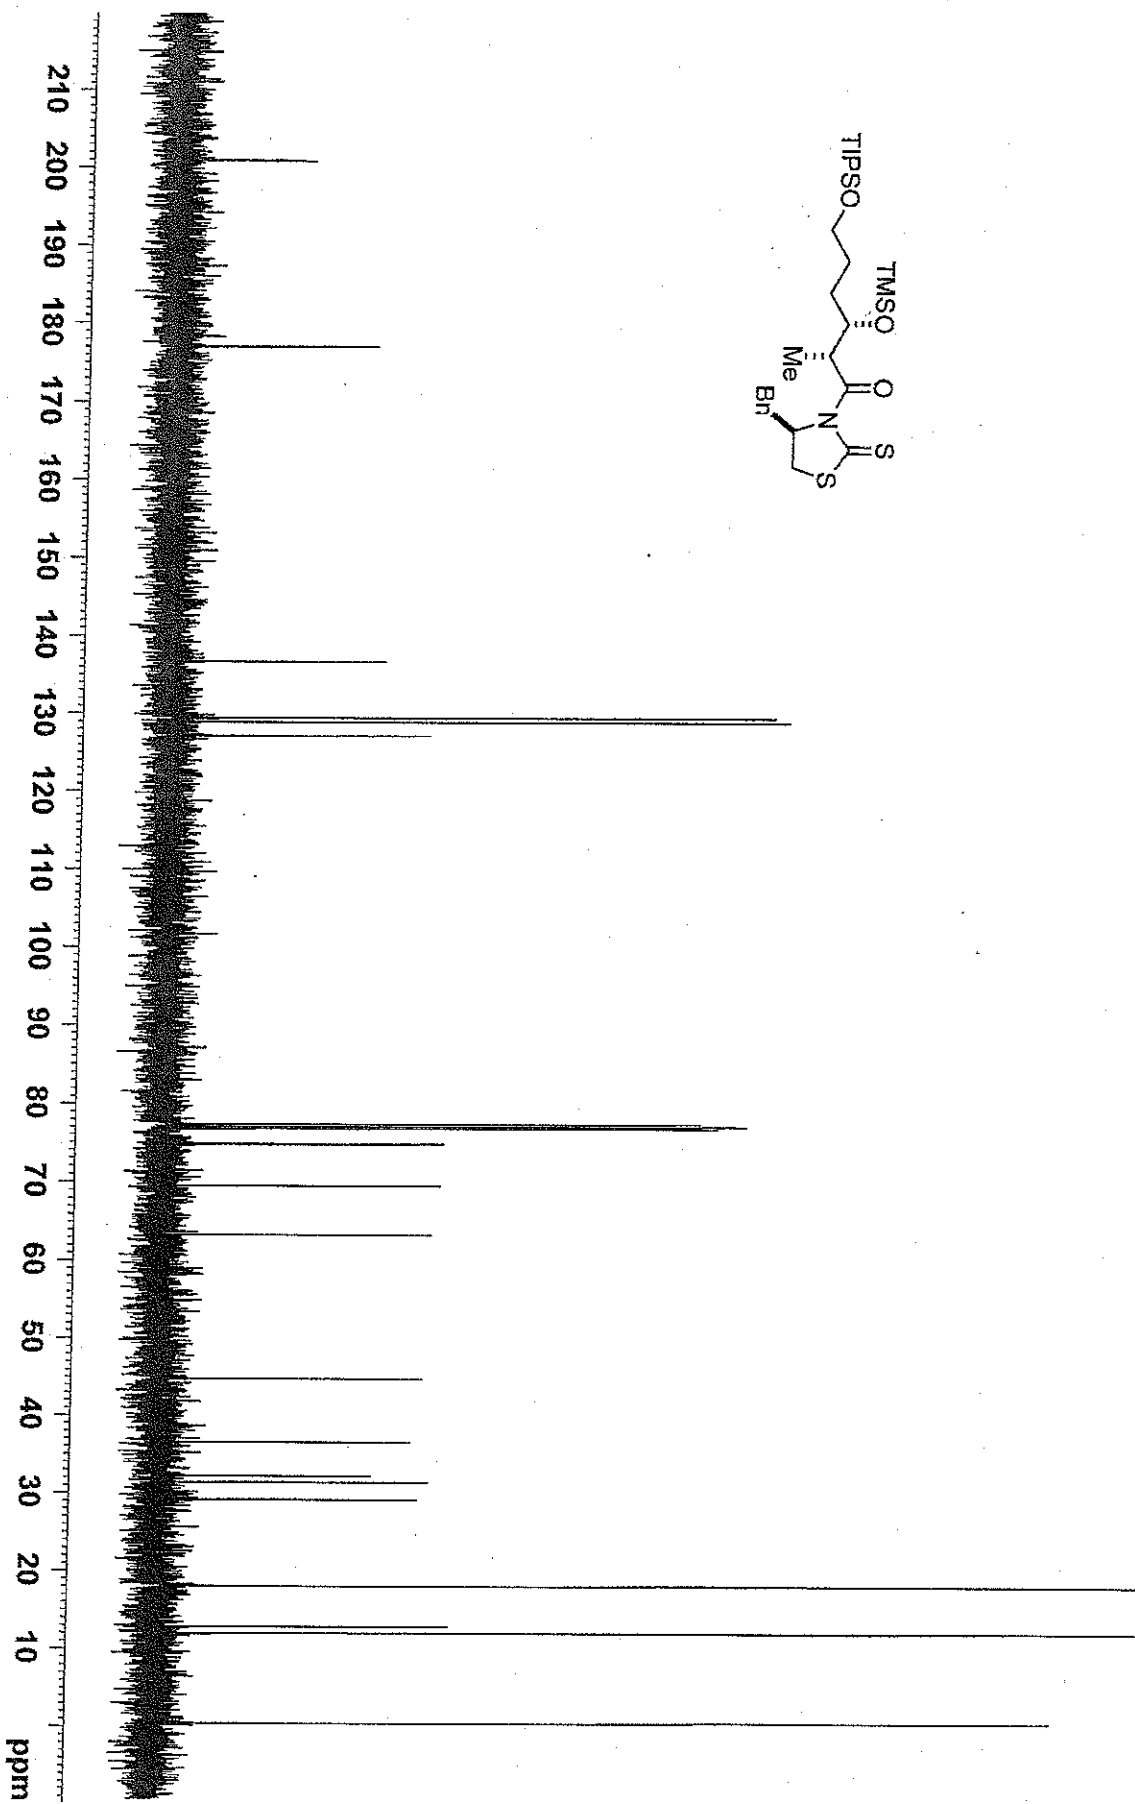





12

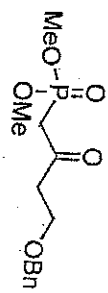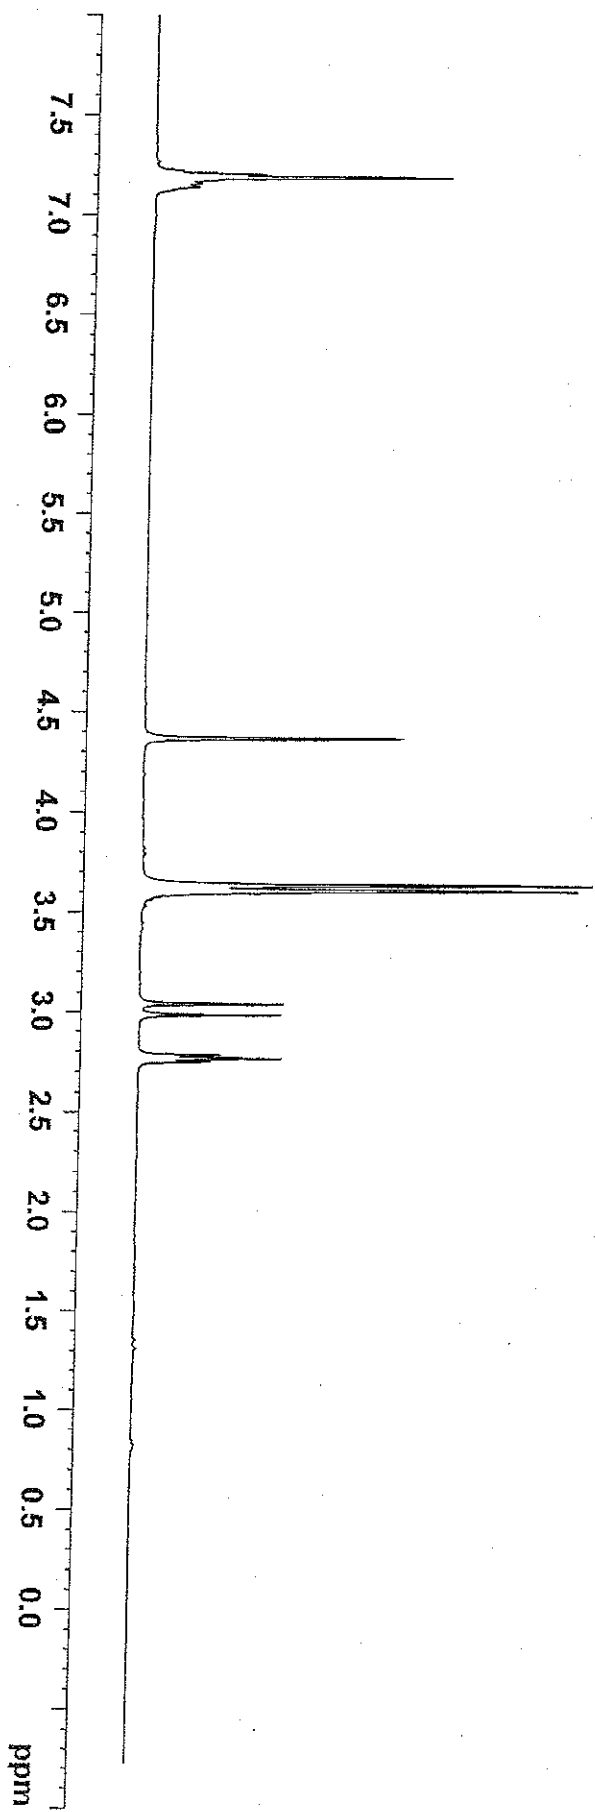



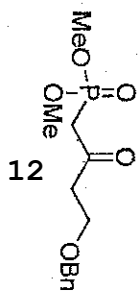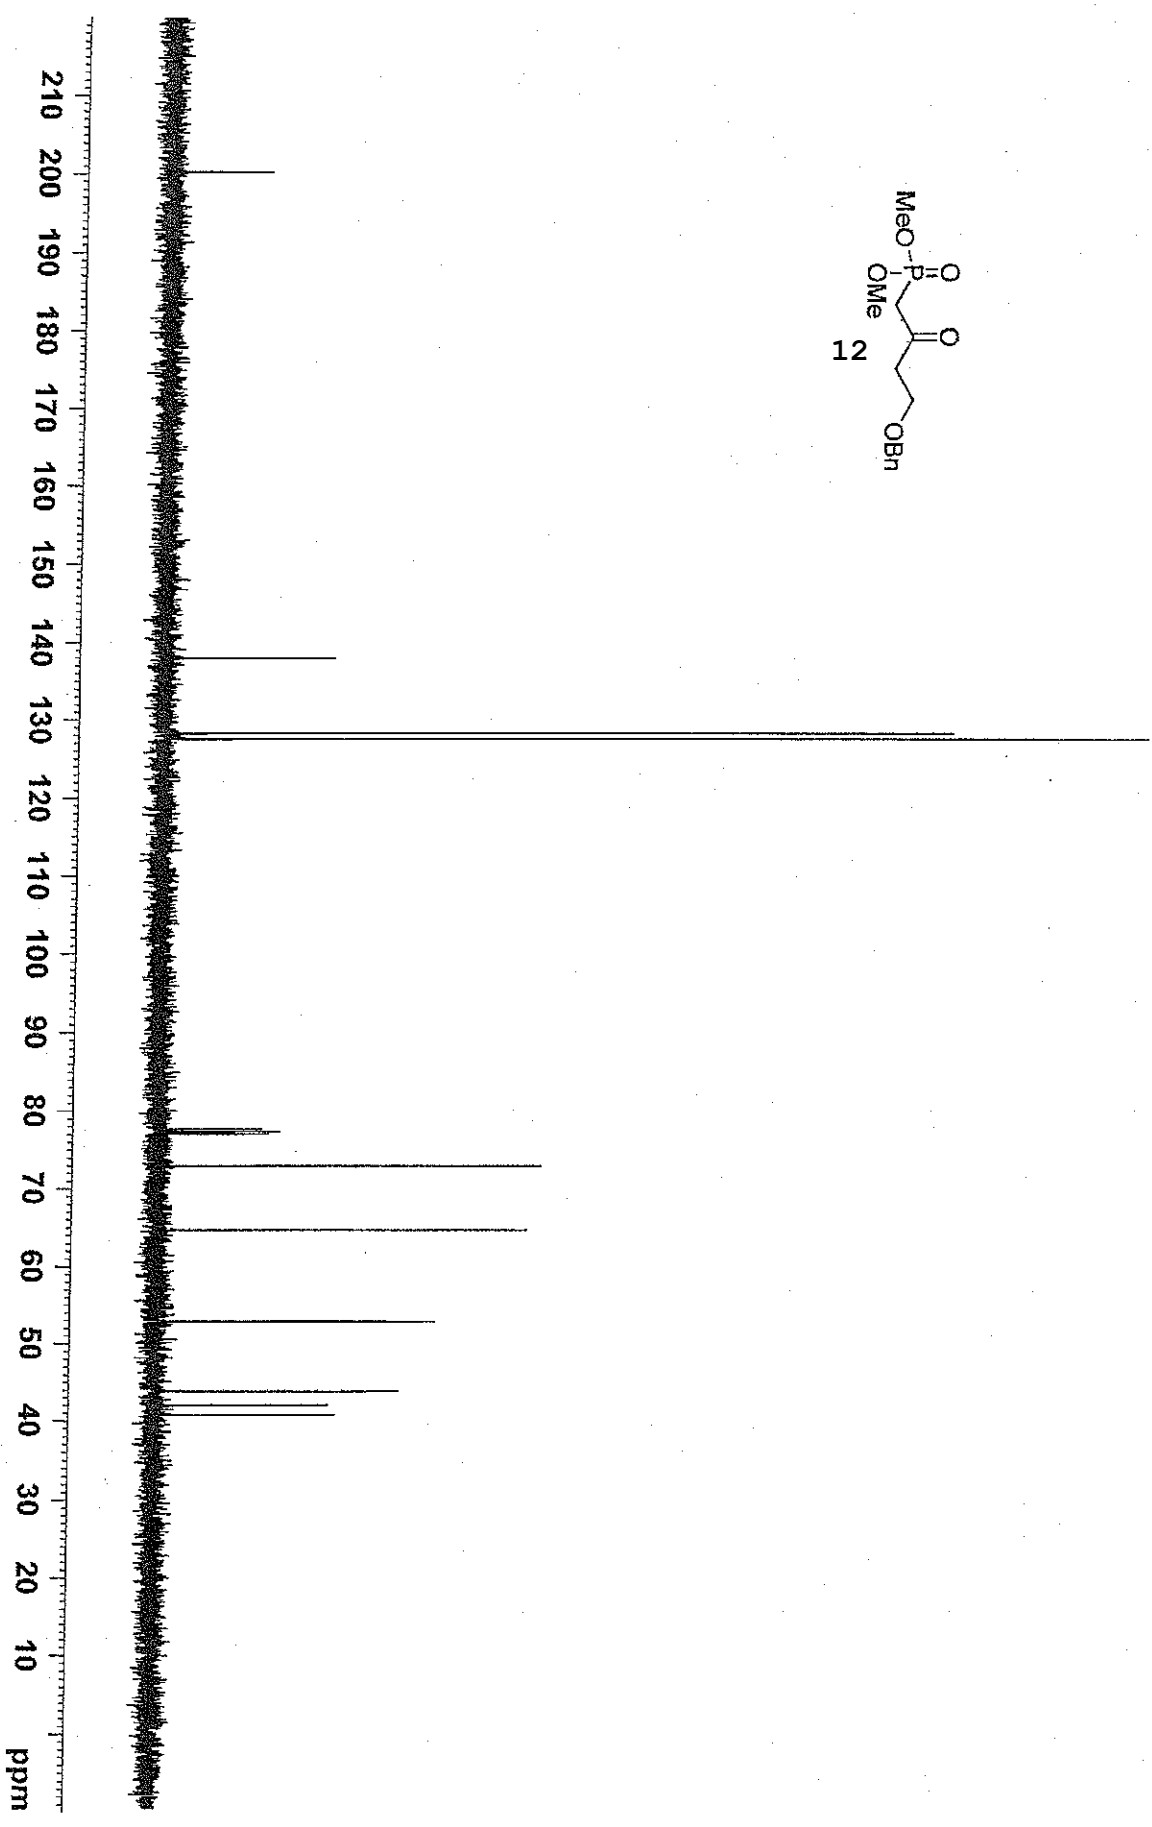

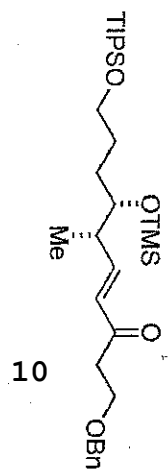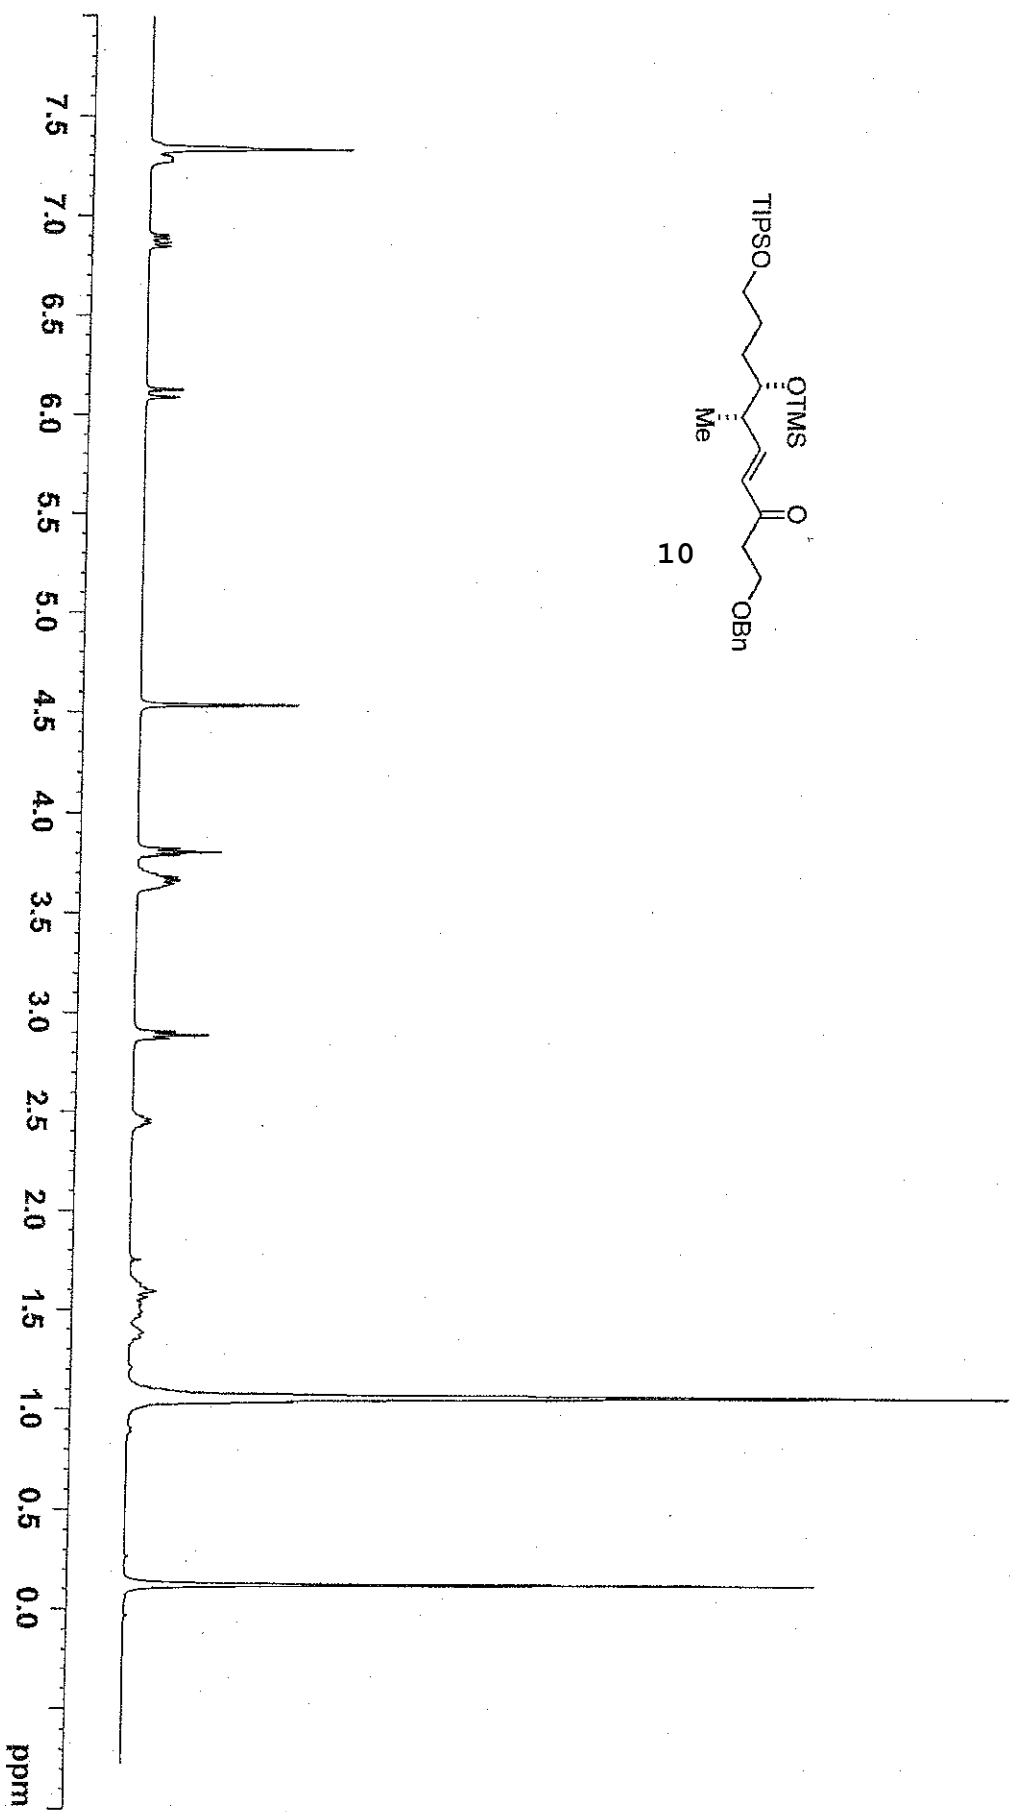



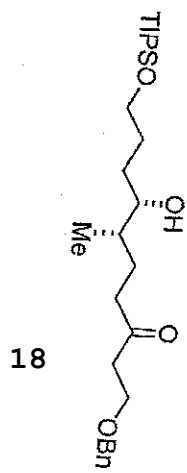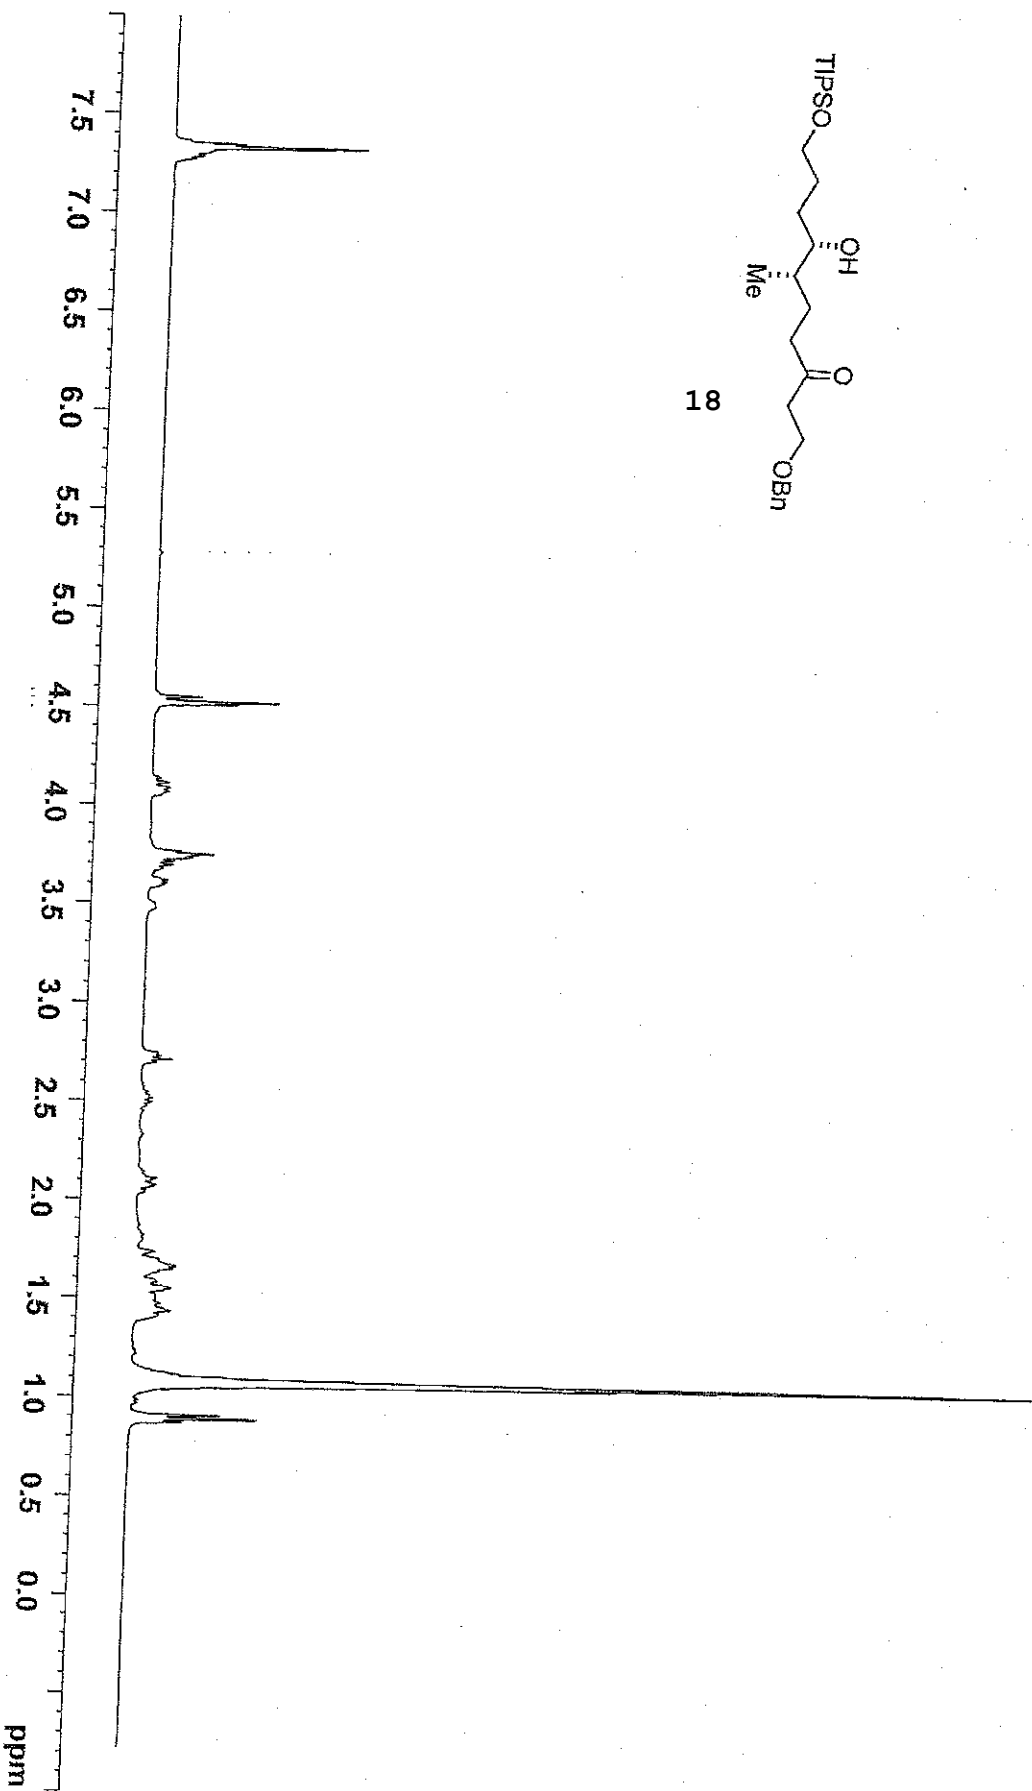

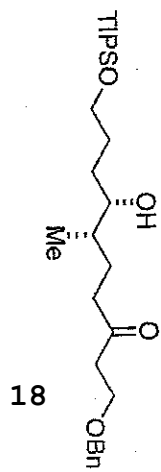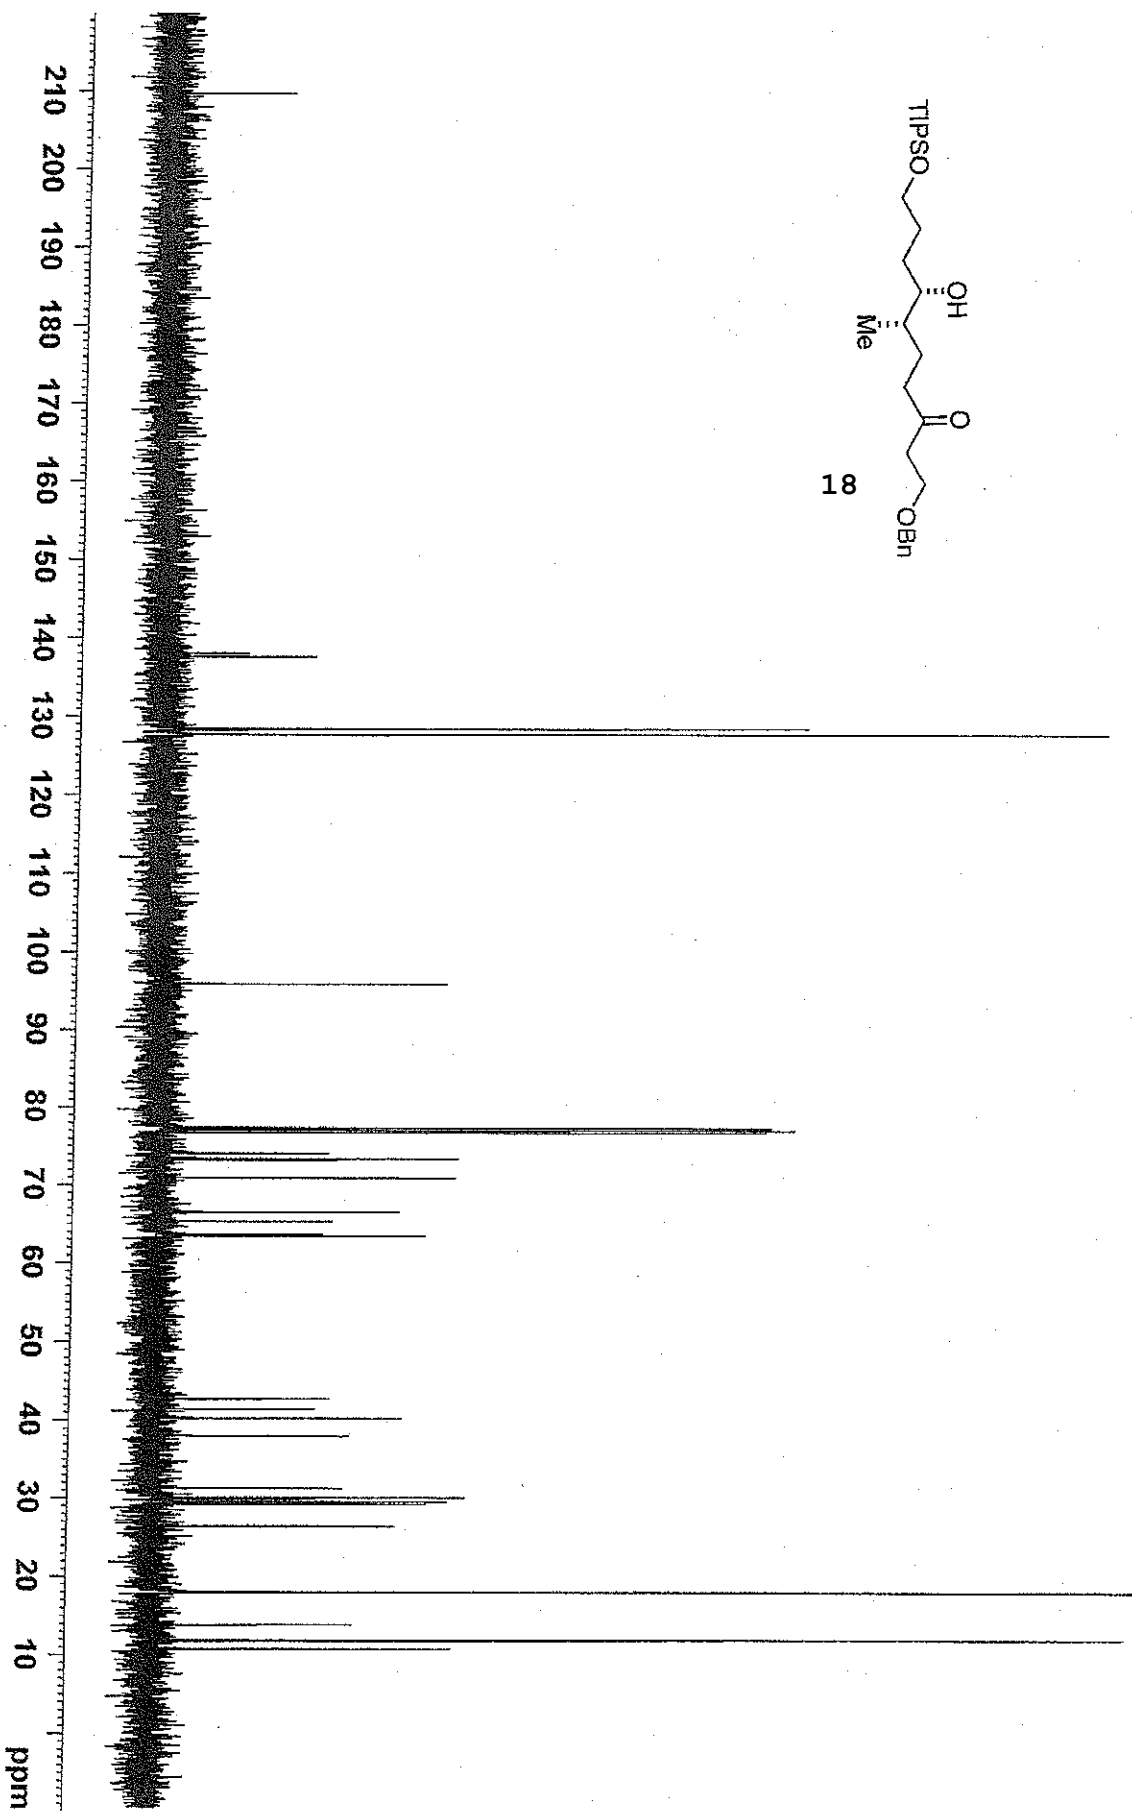

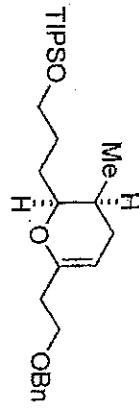

9

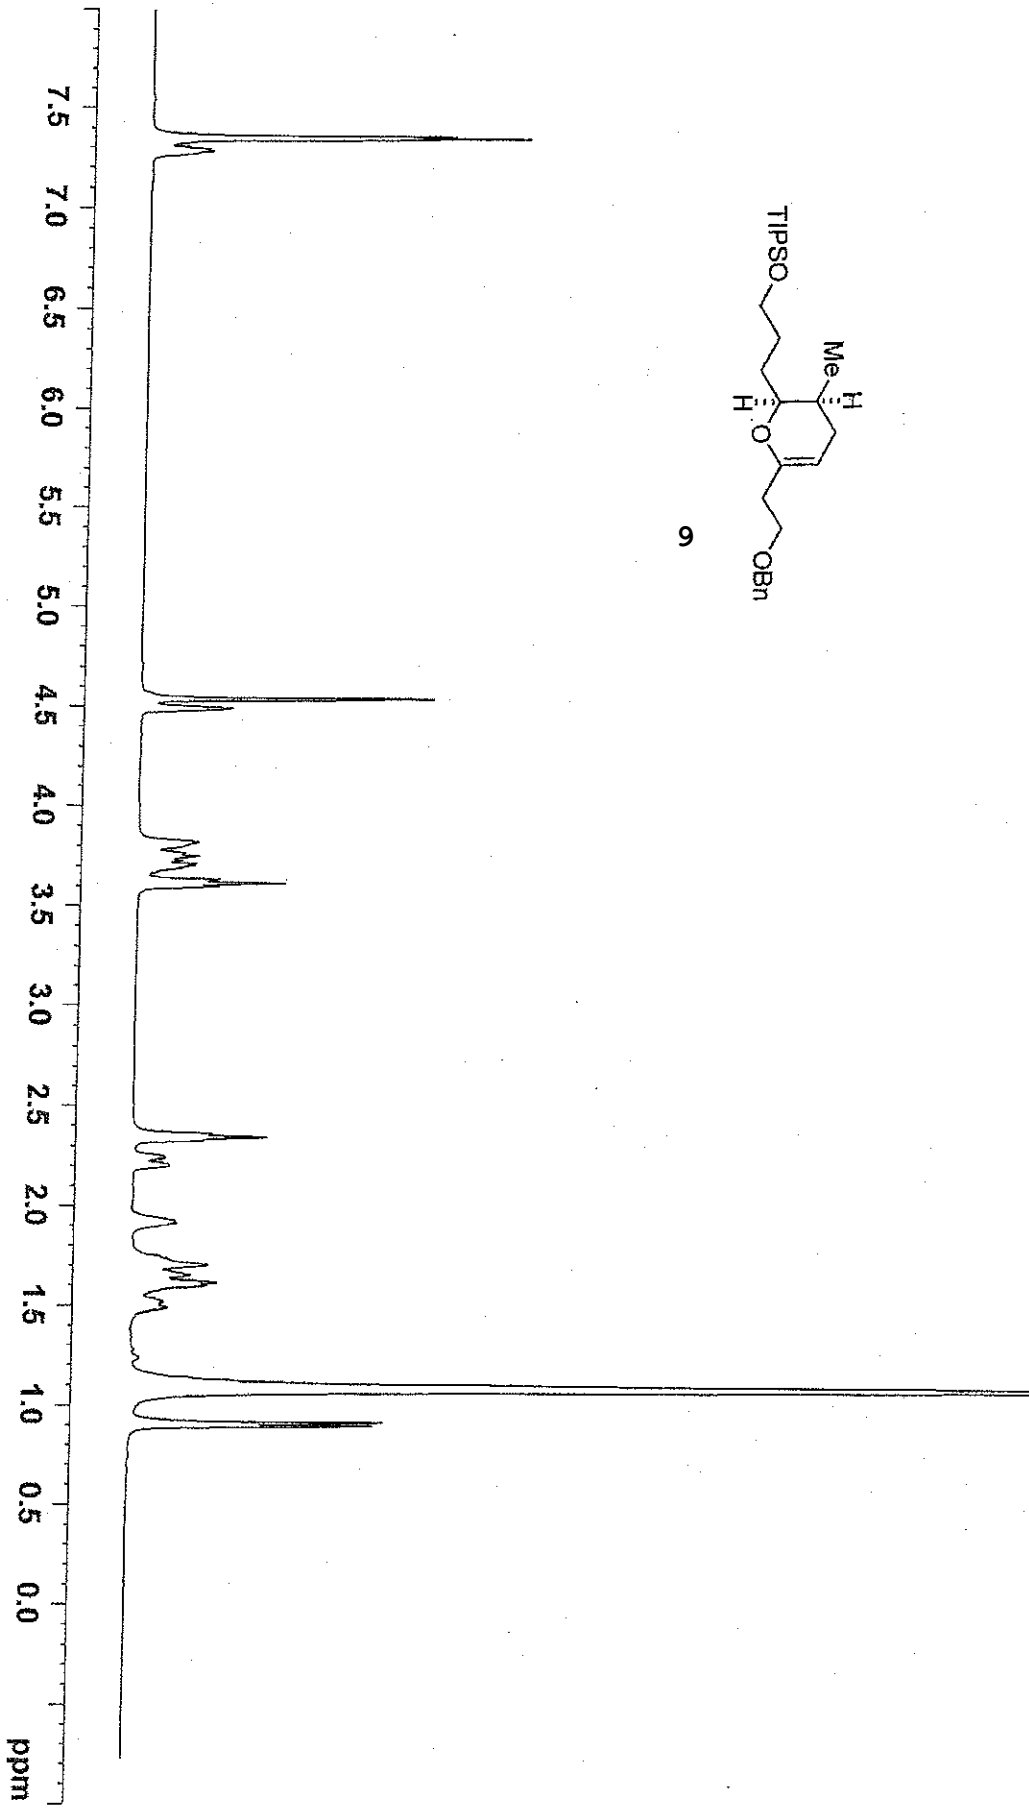

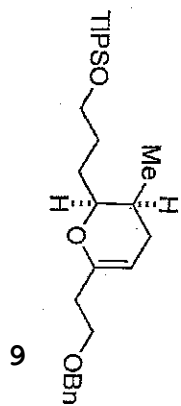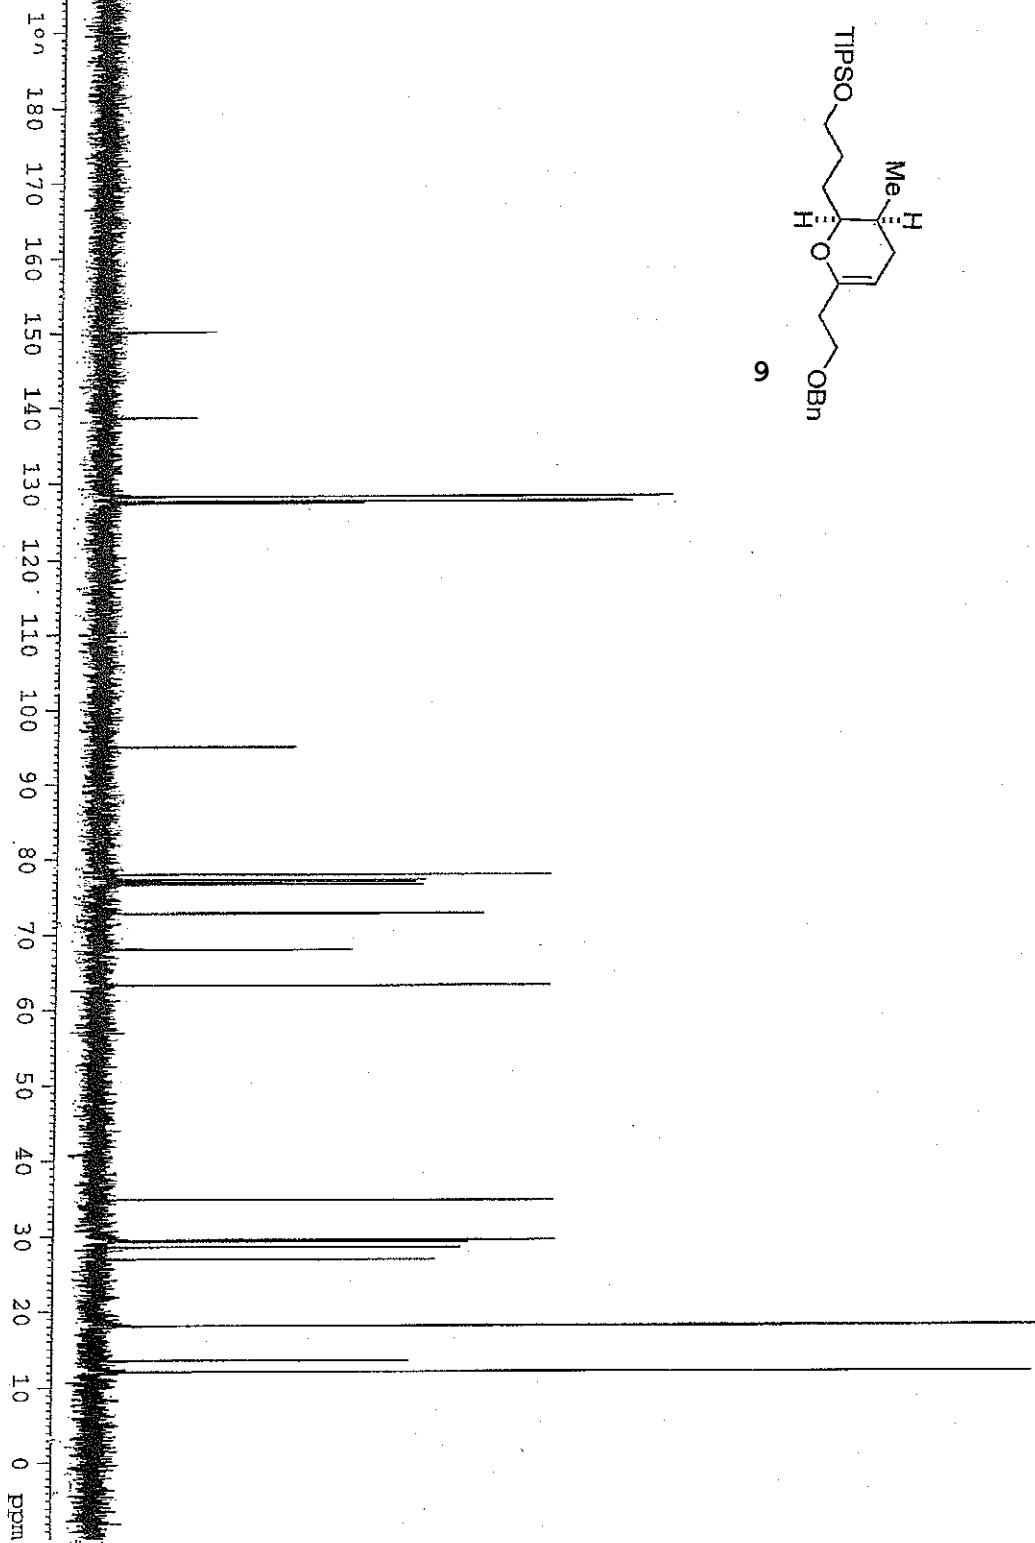







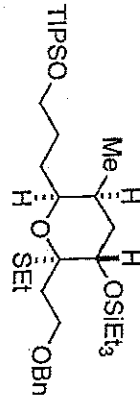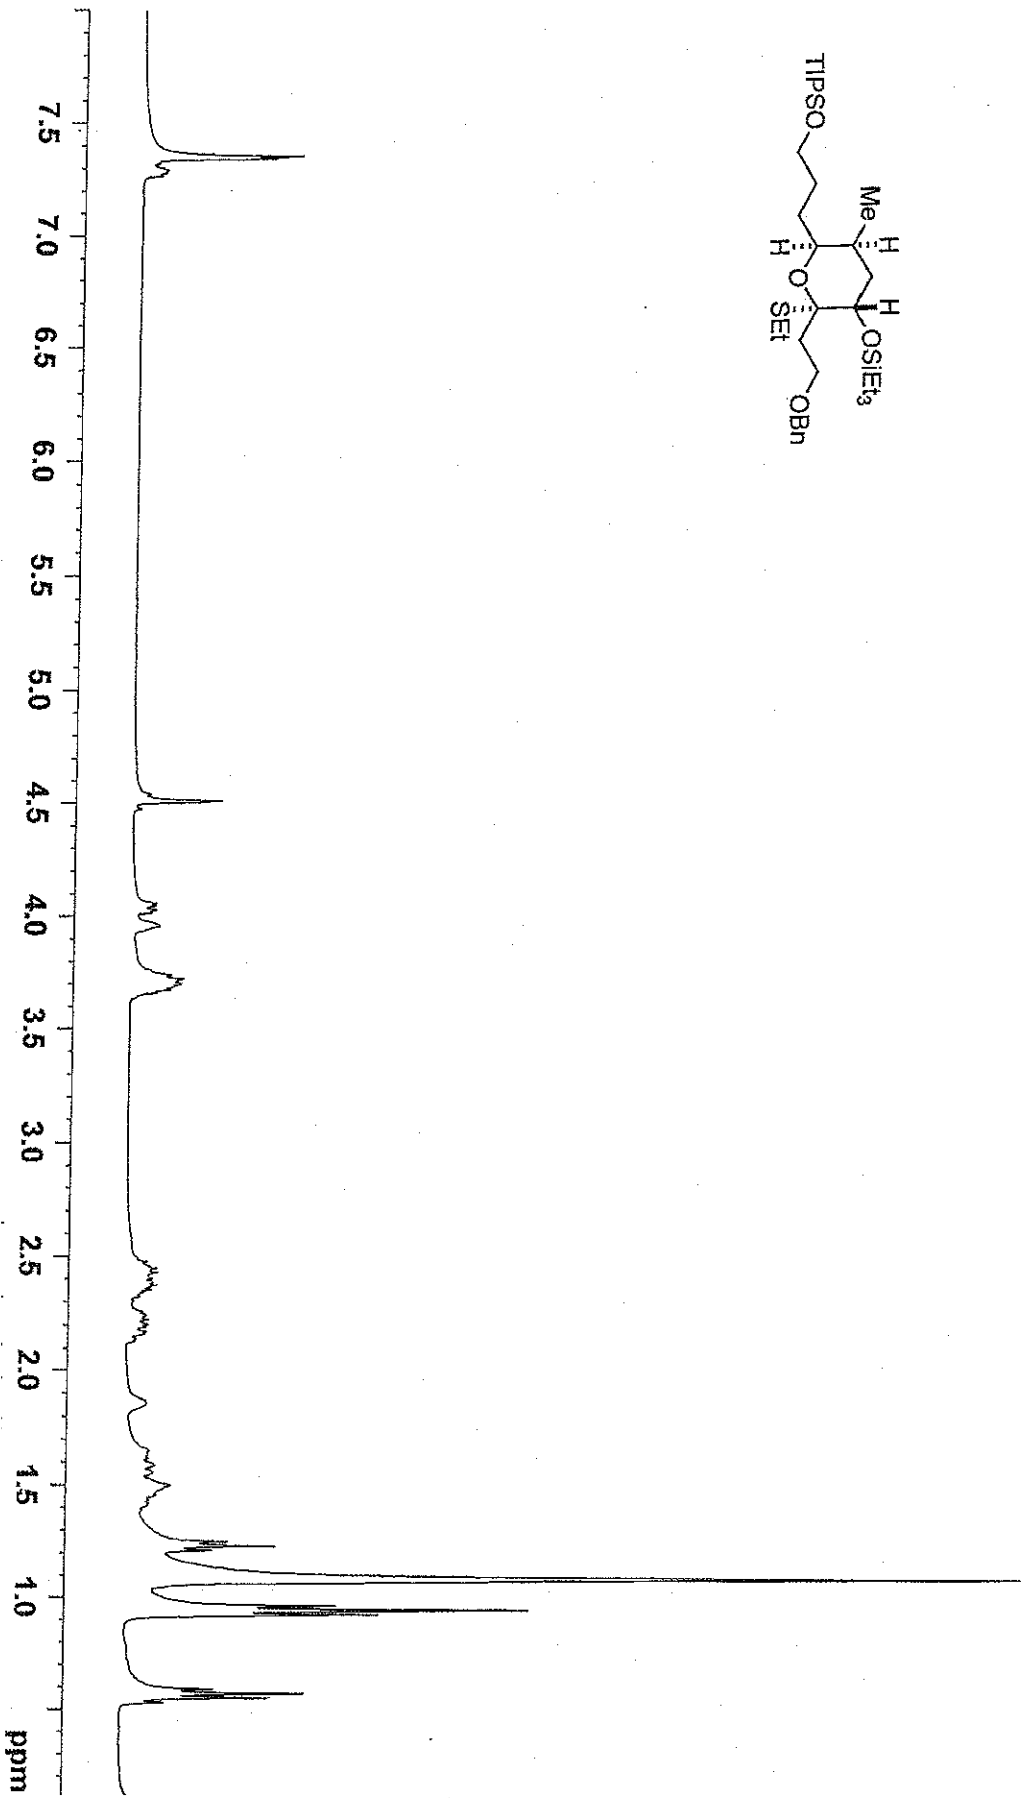

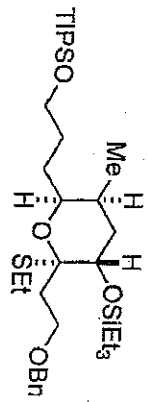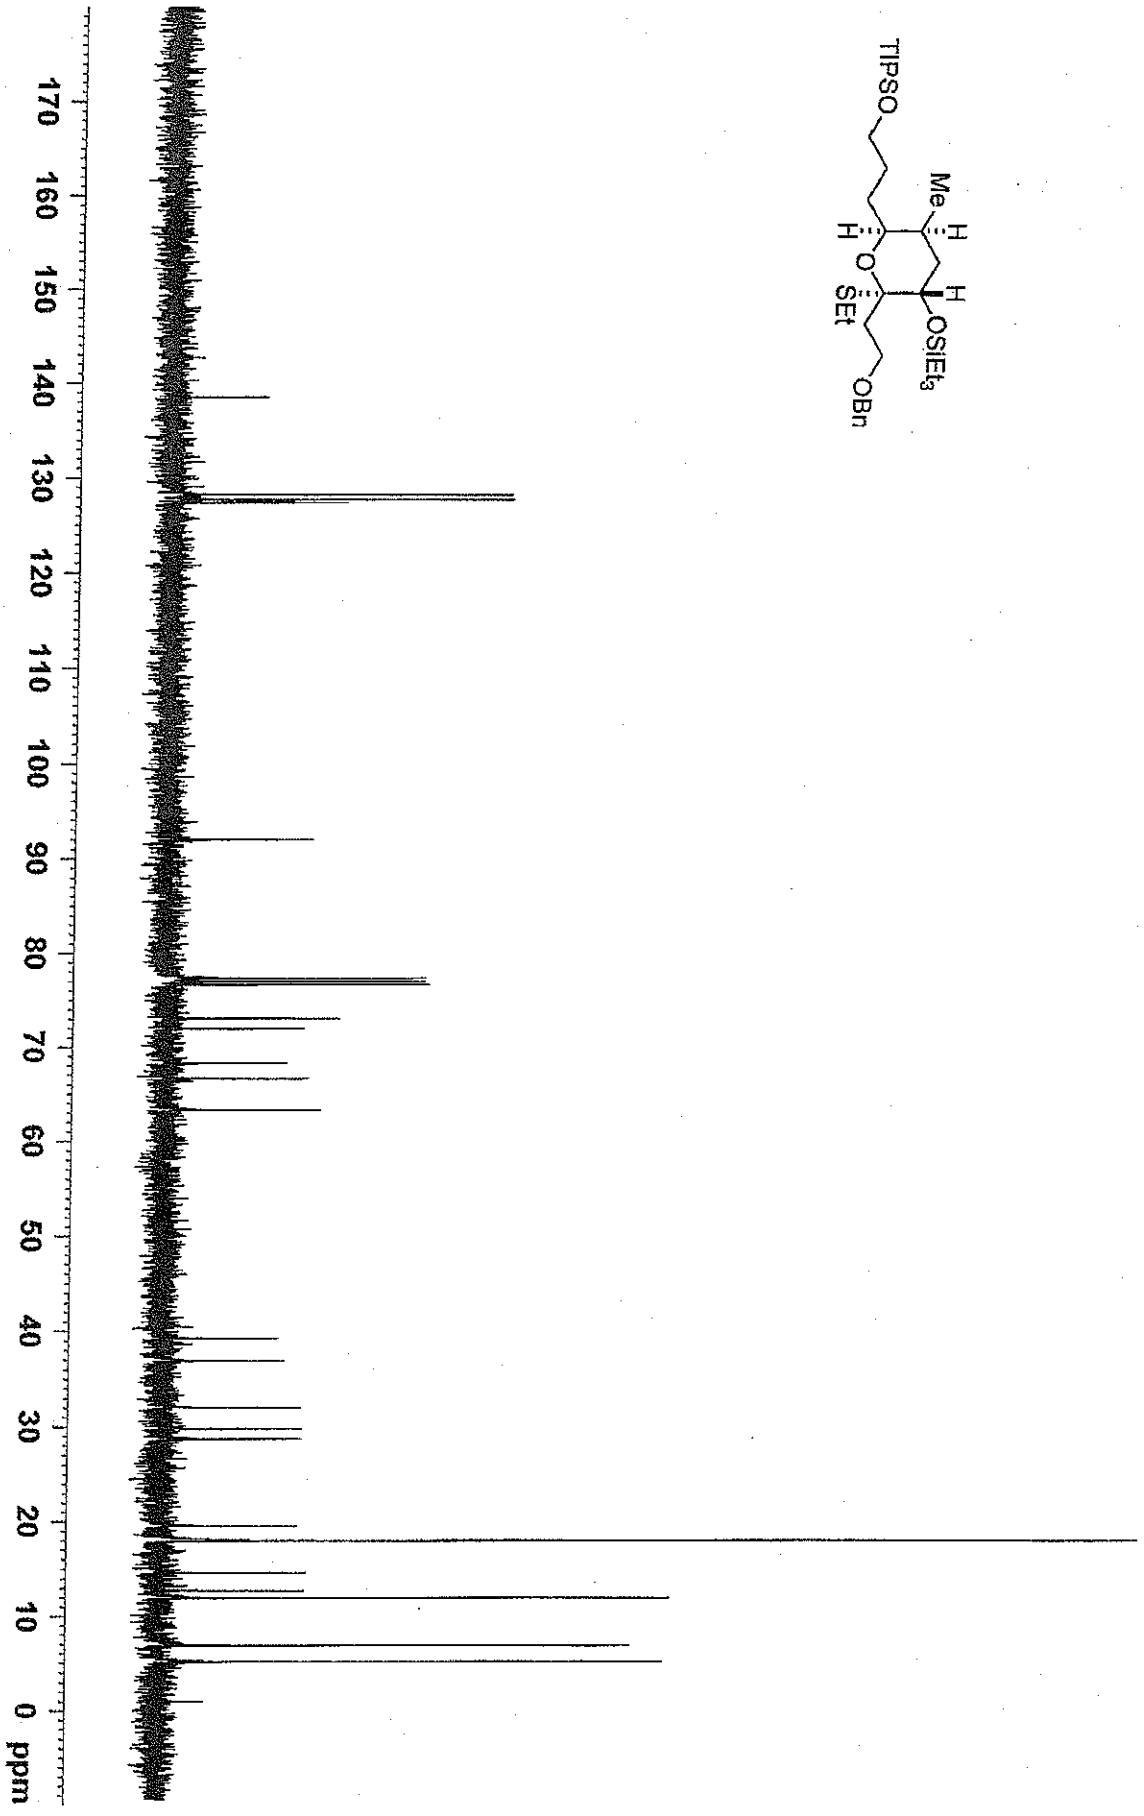

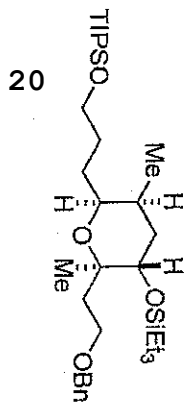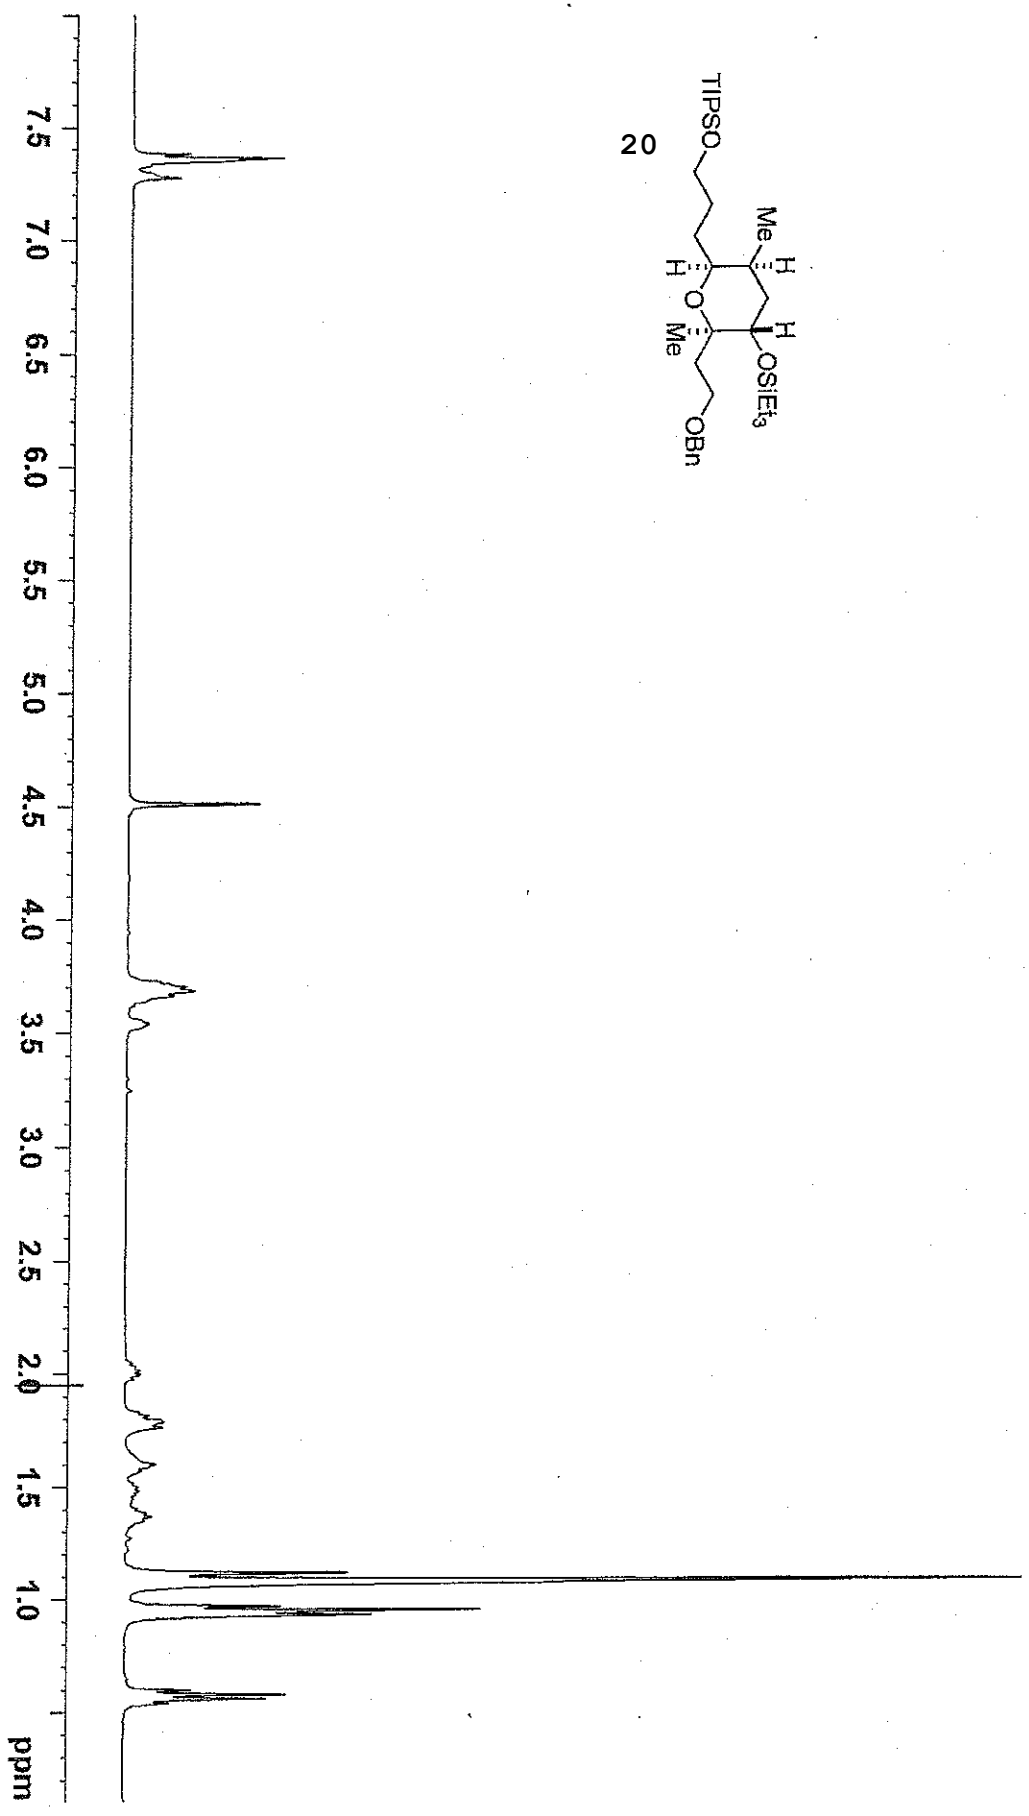

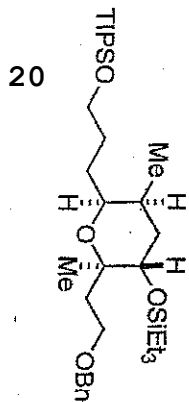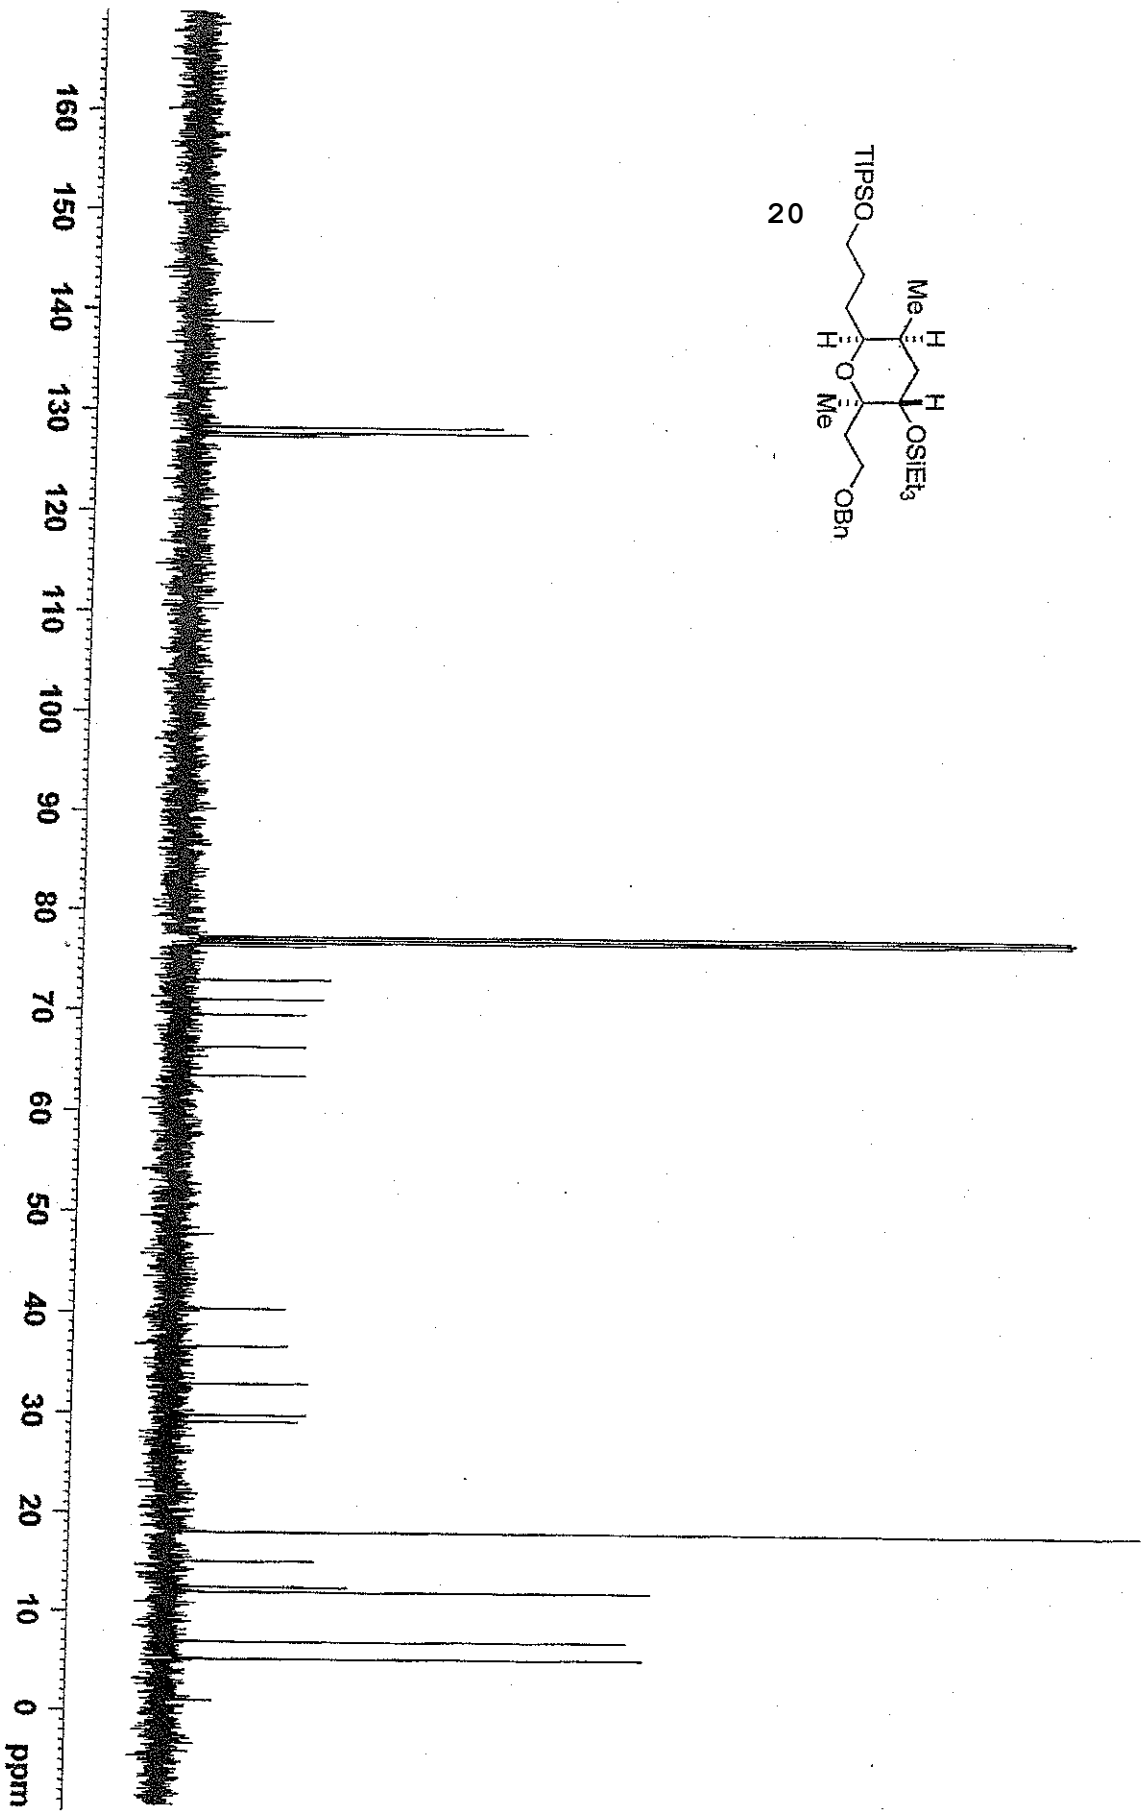

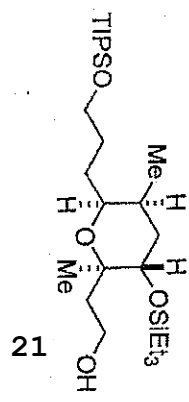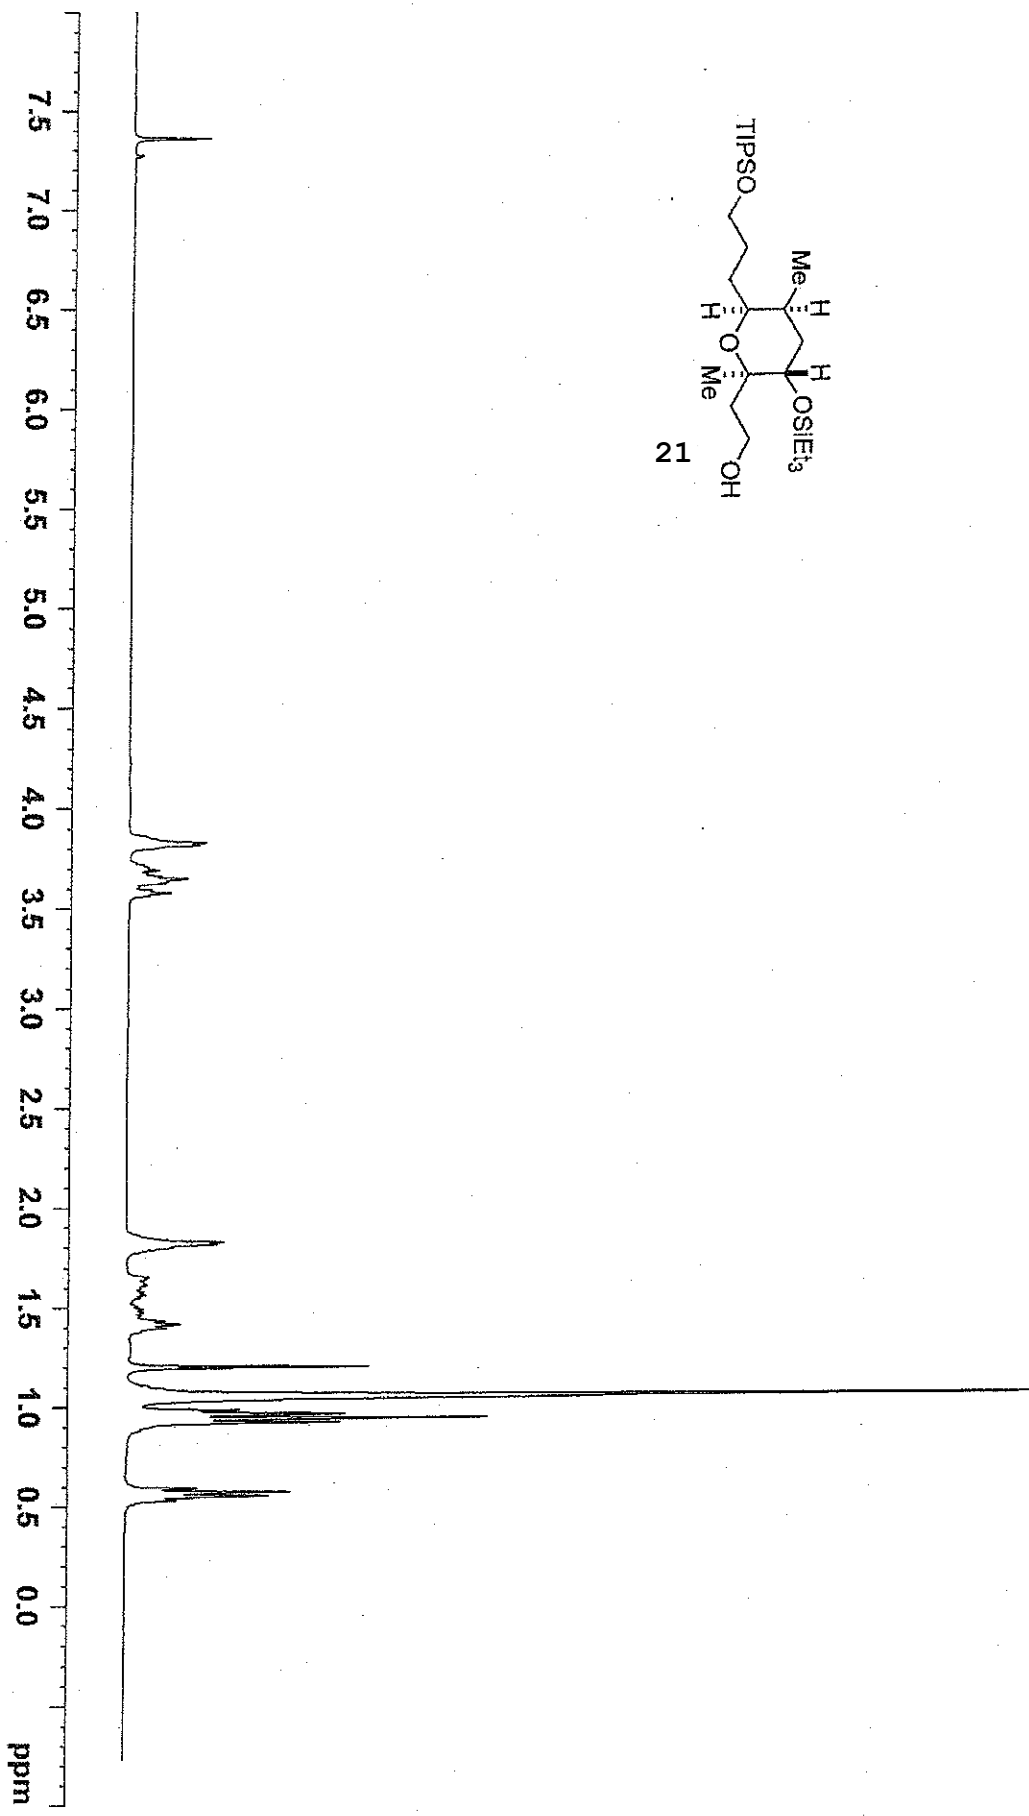

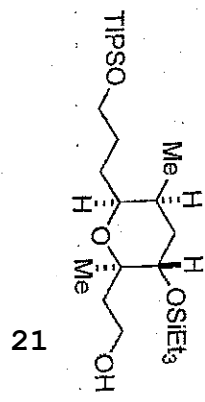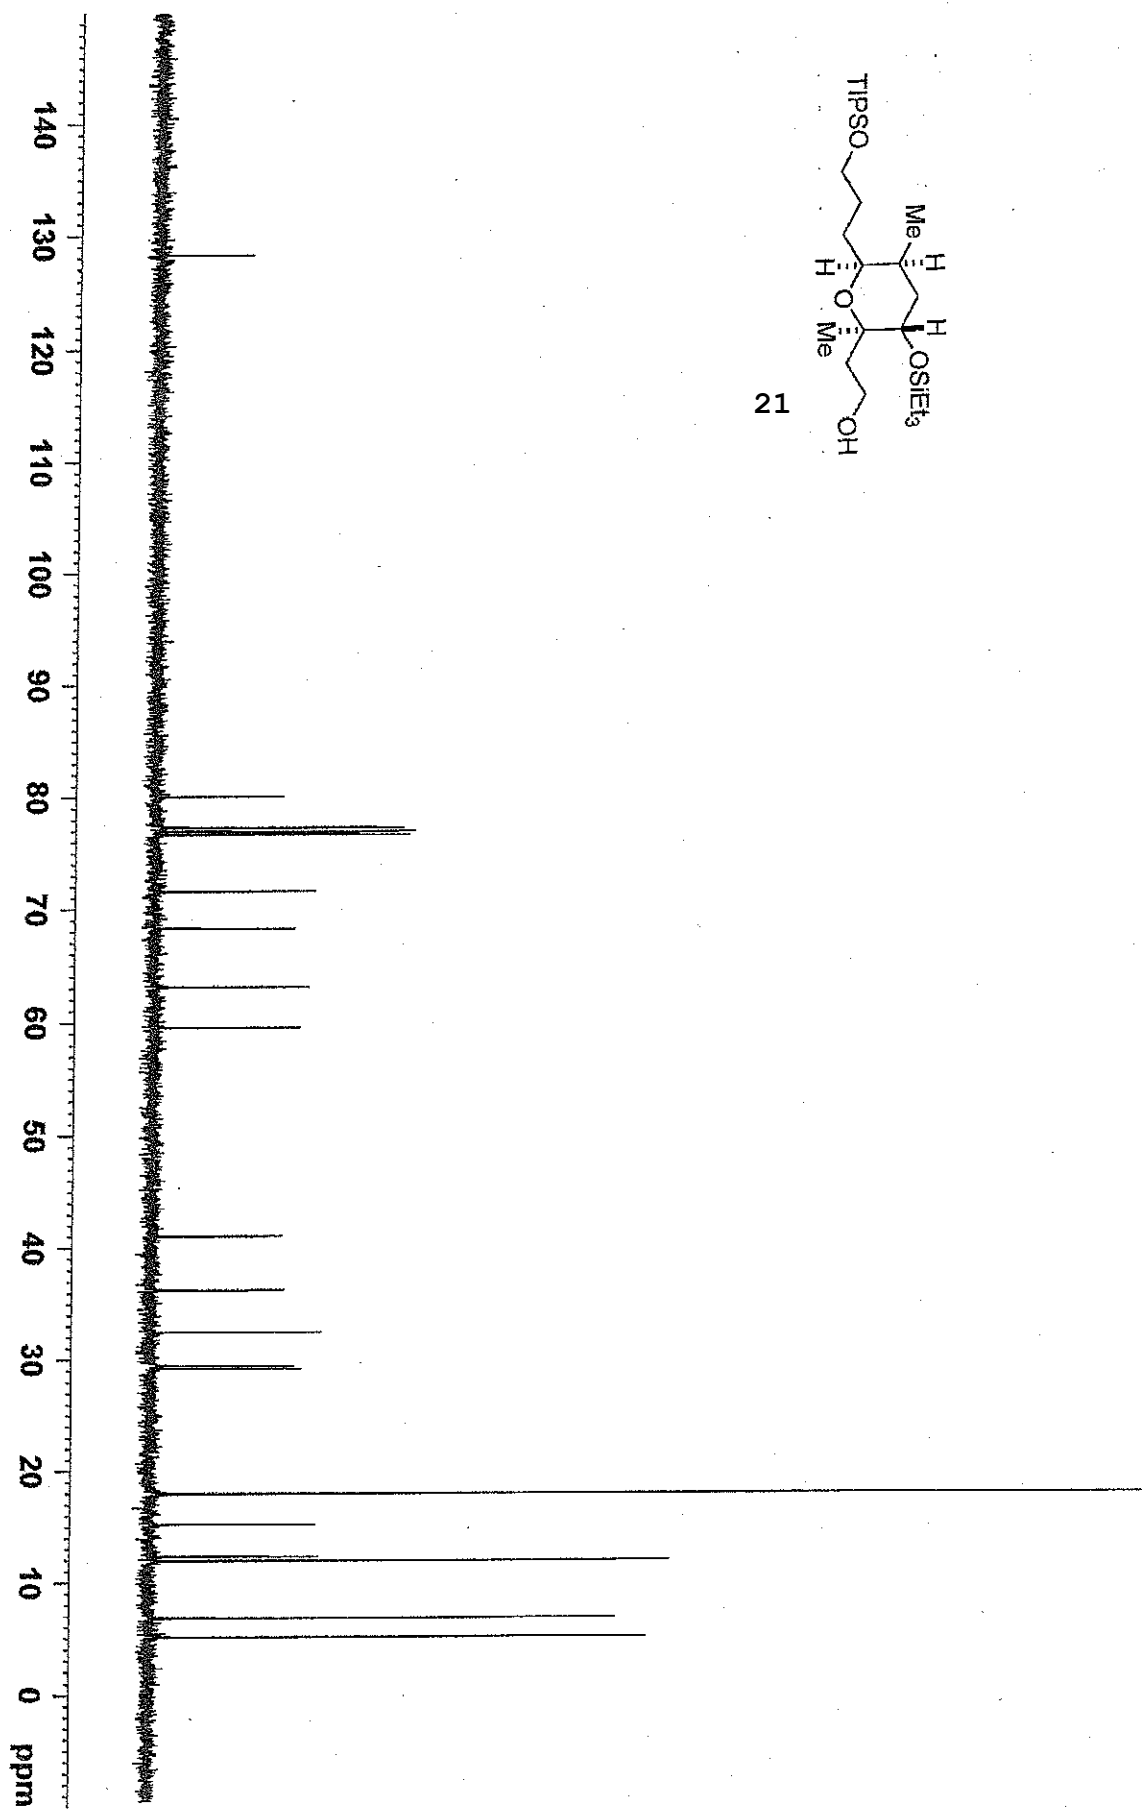

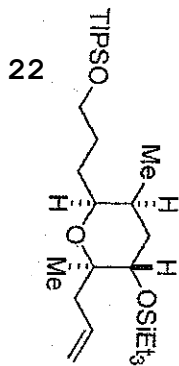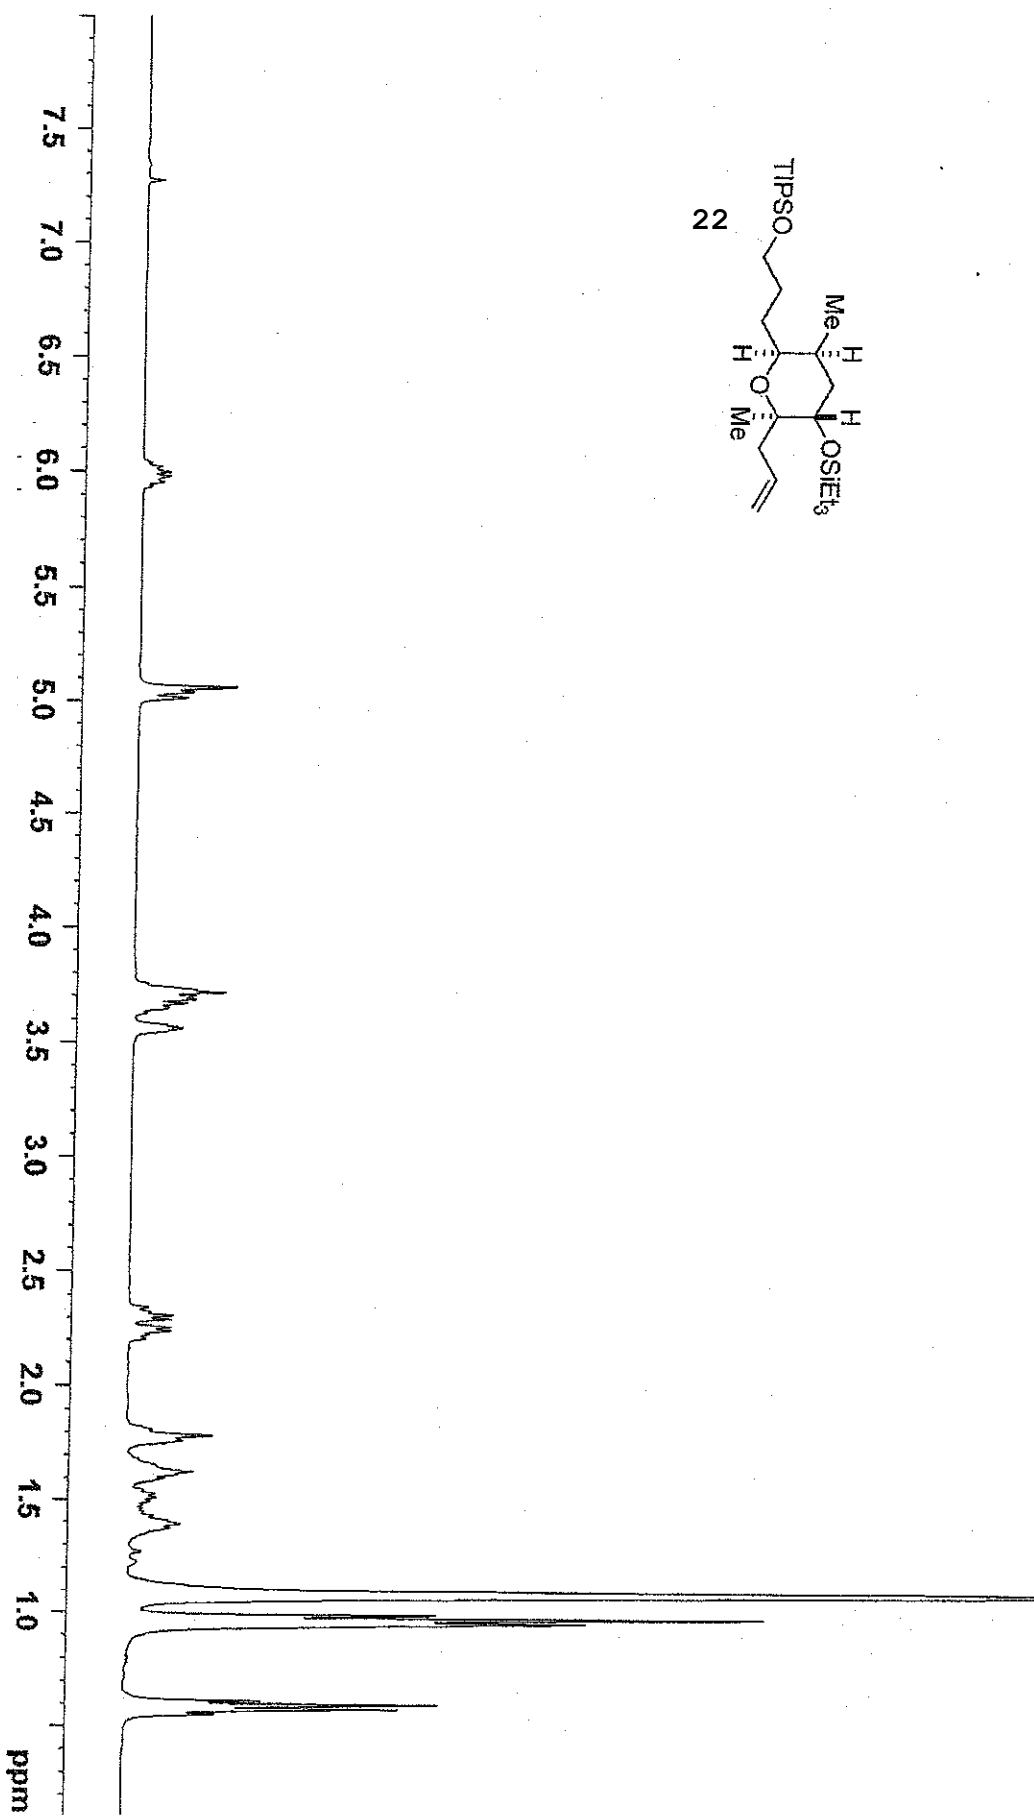



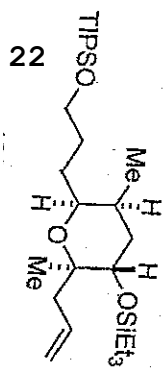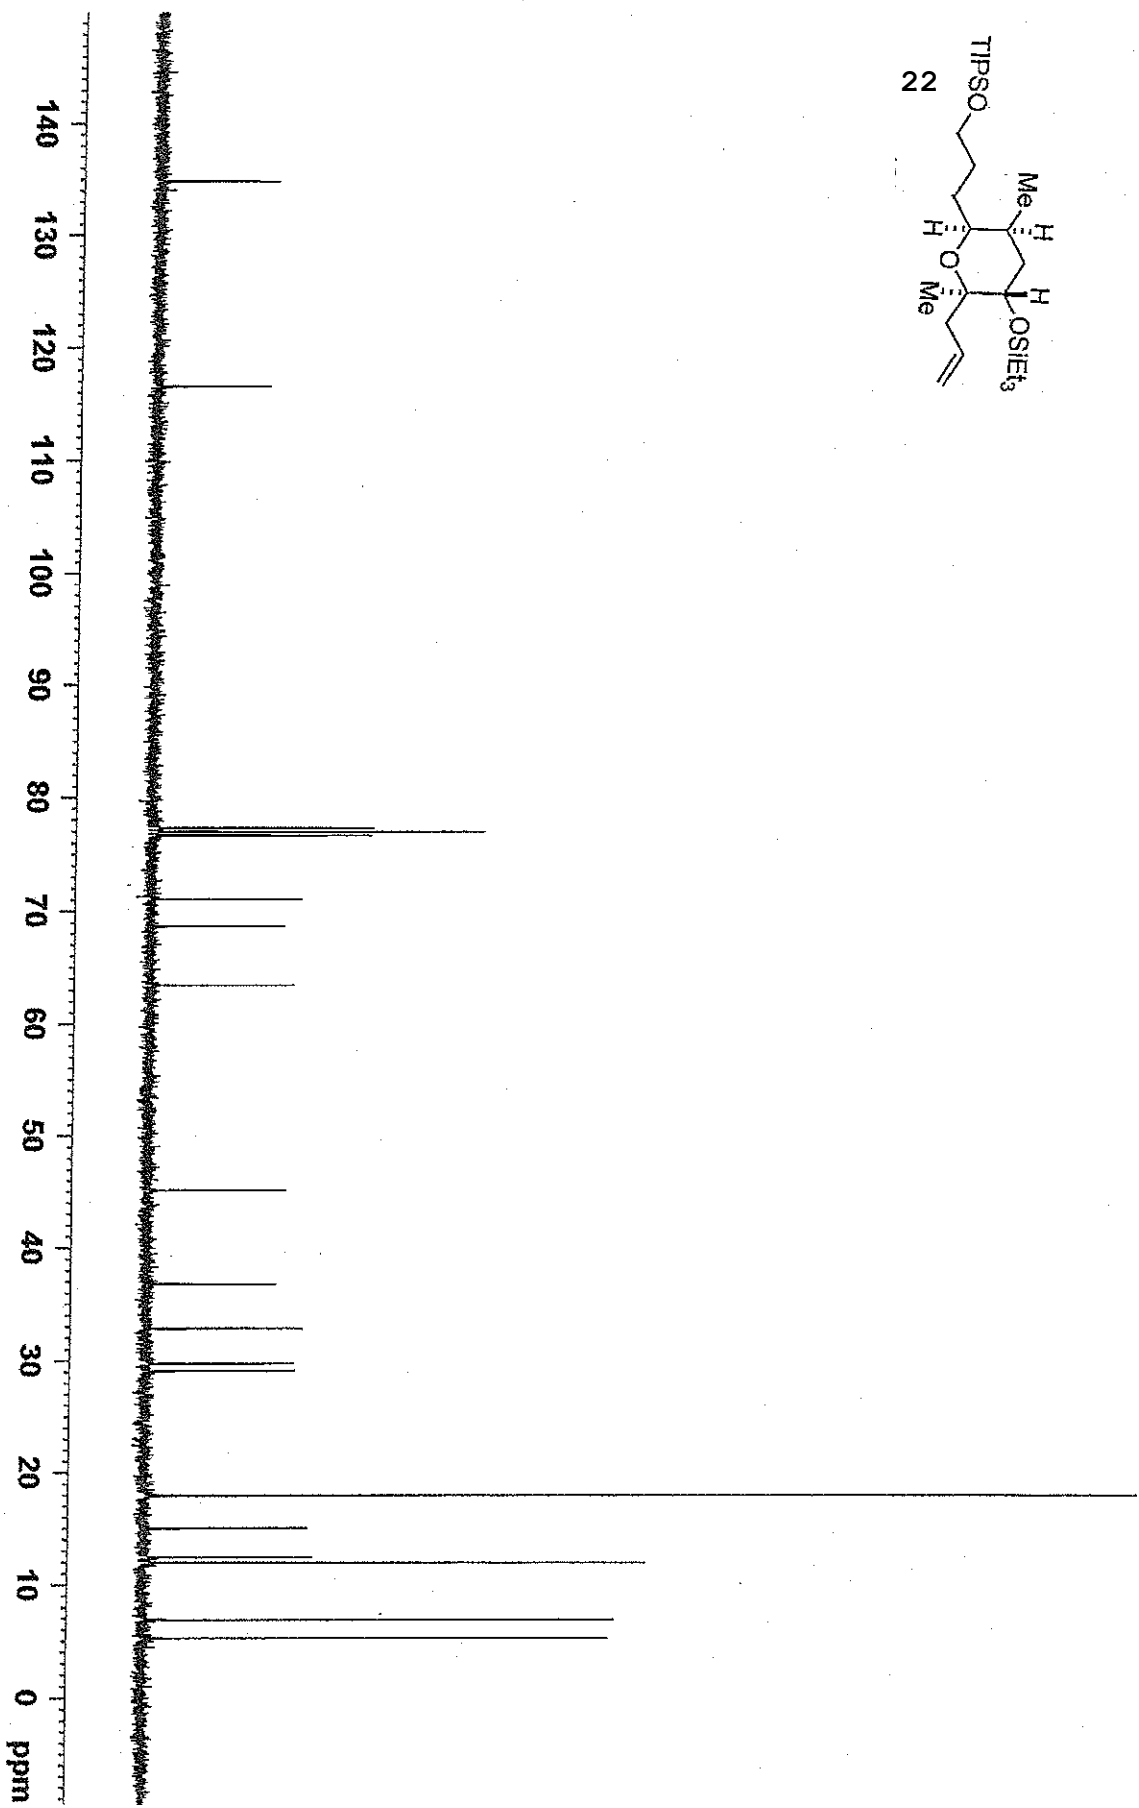

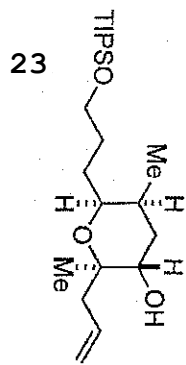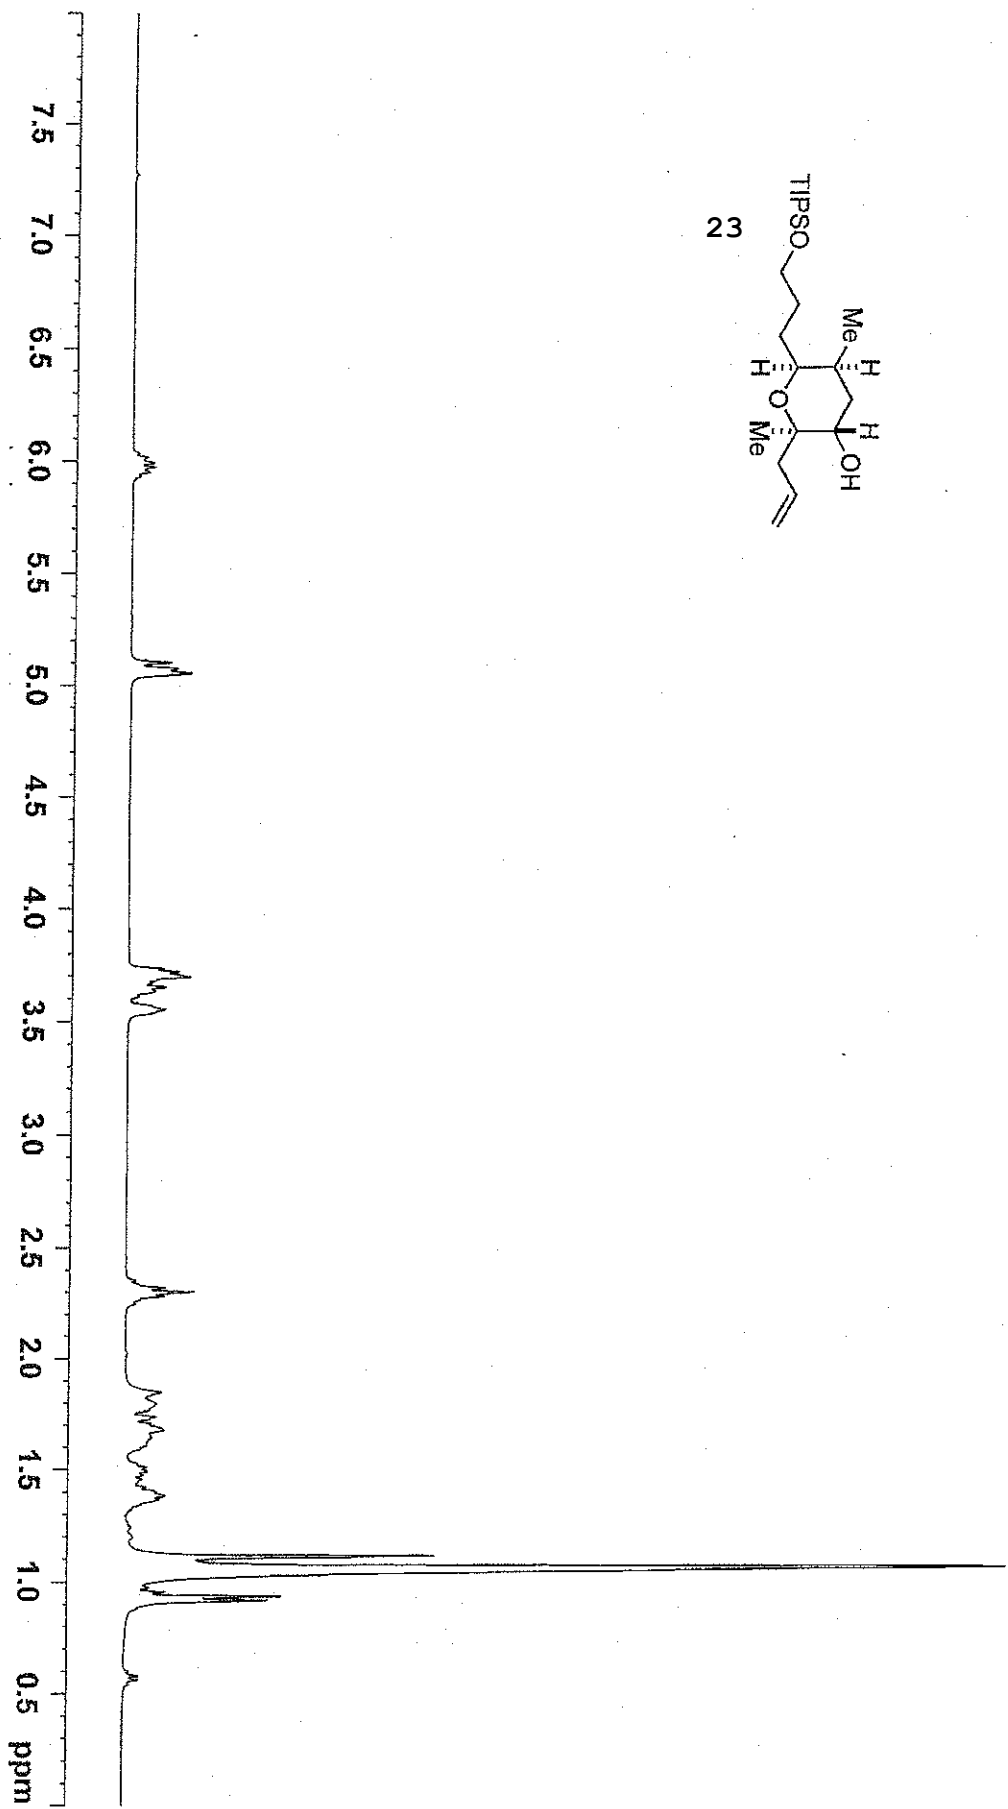

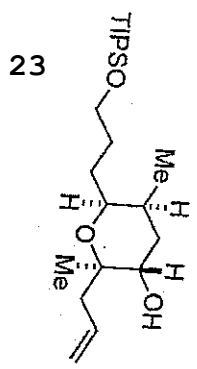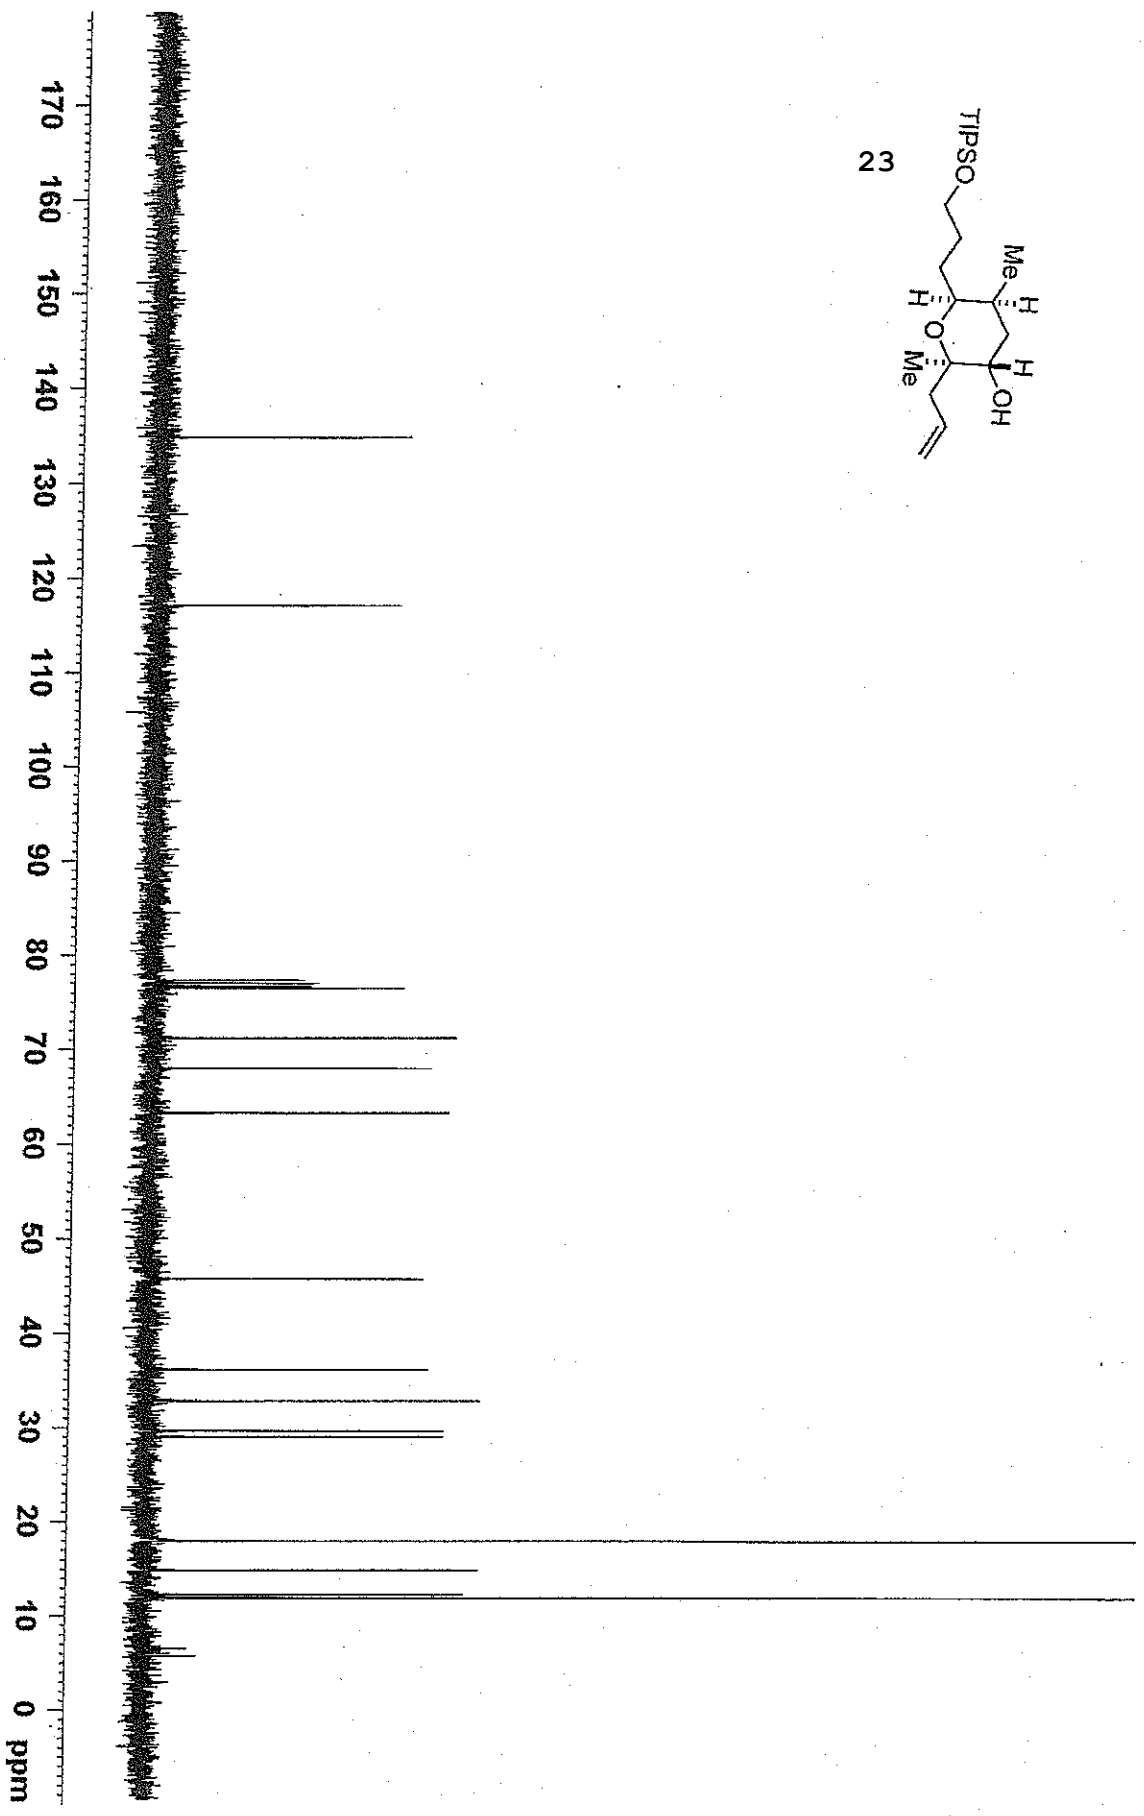

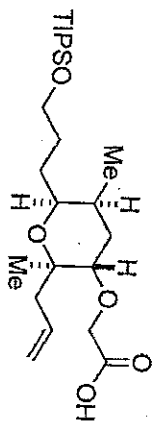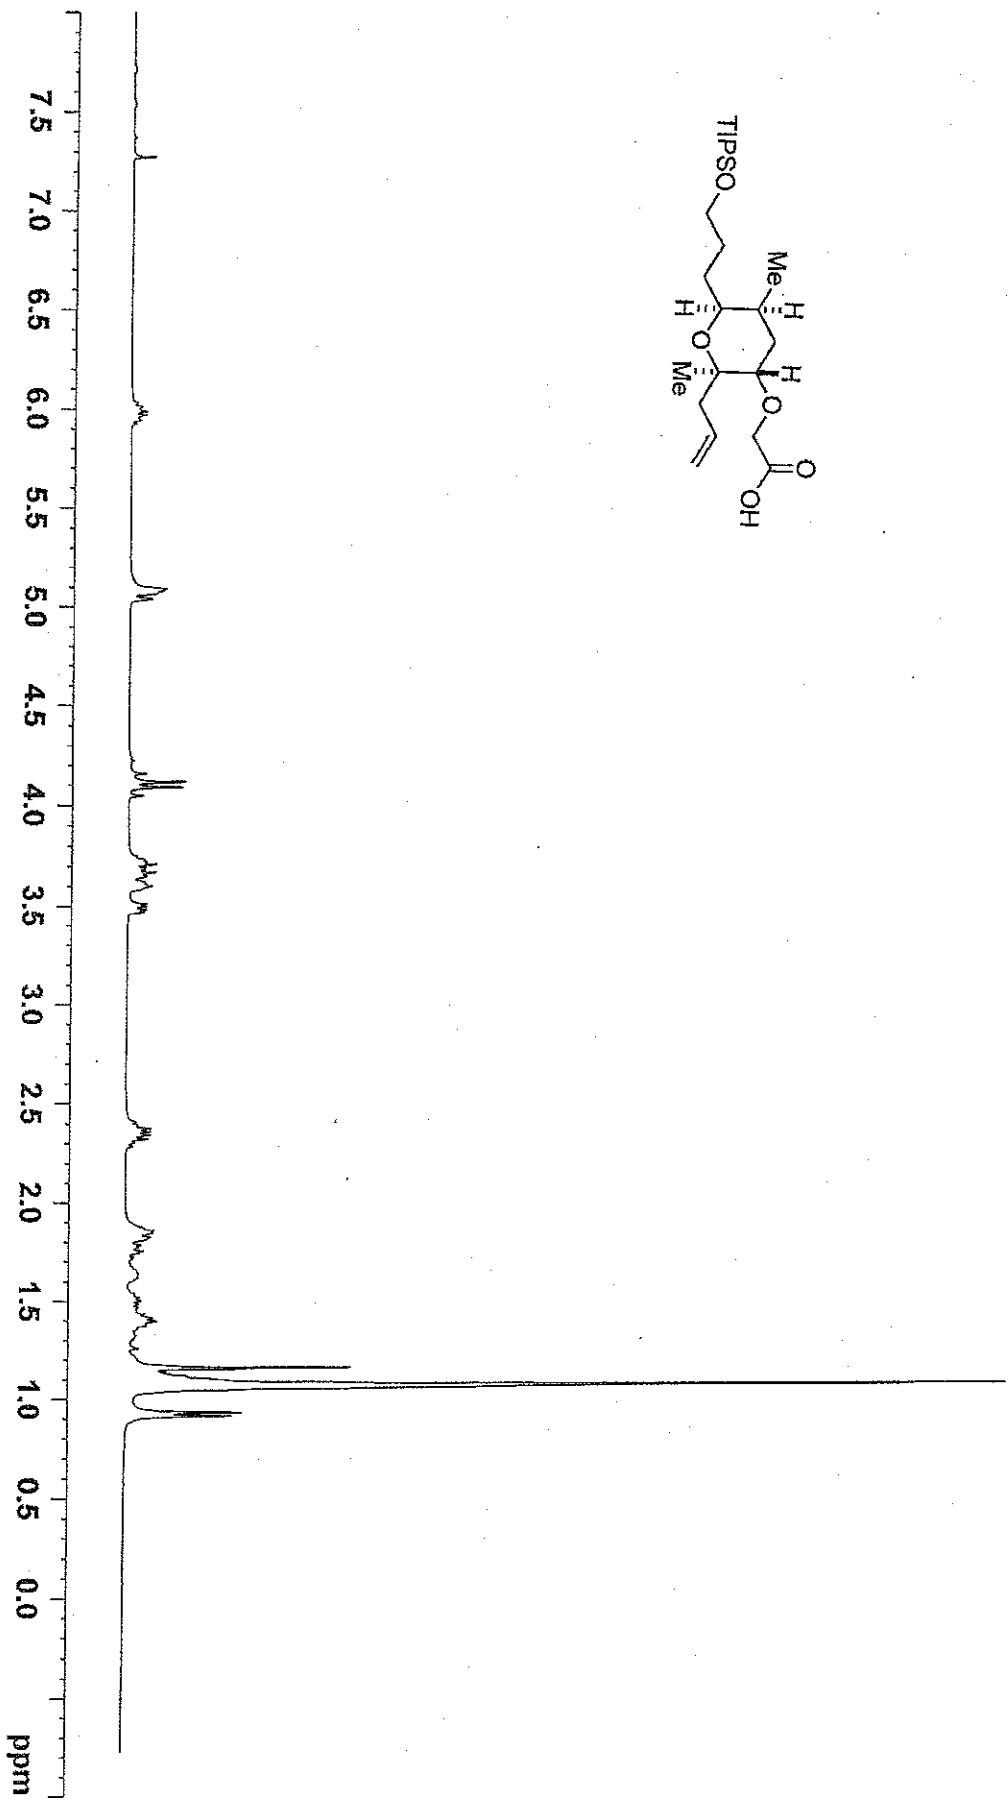

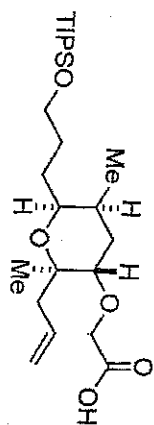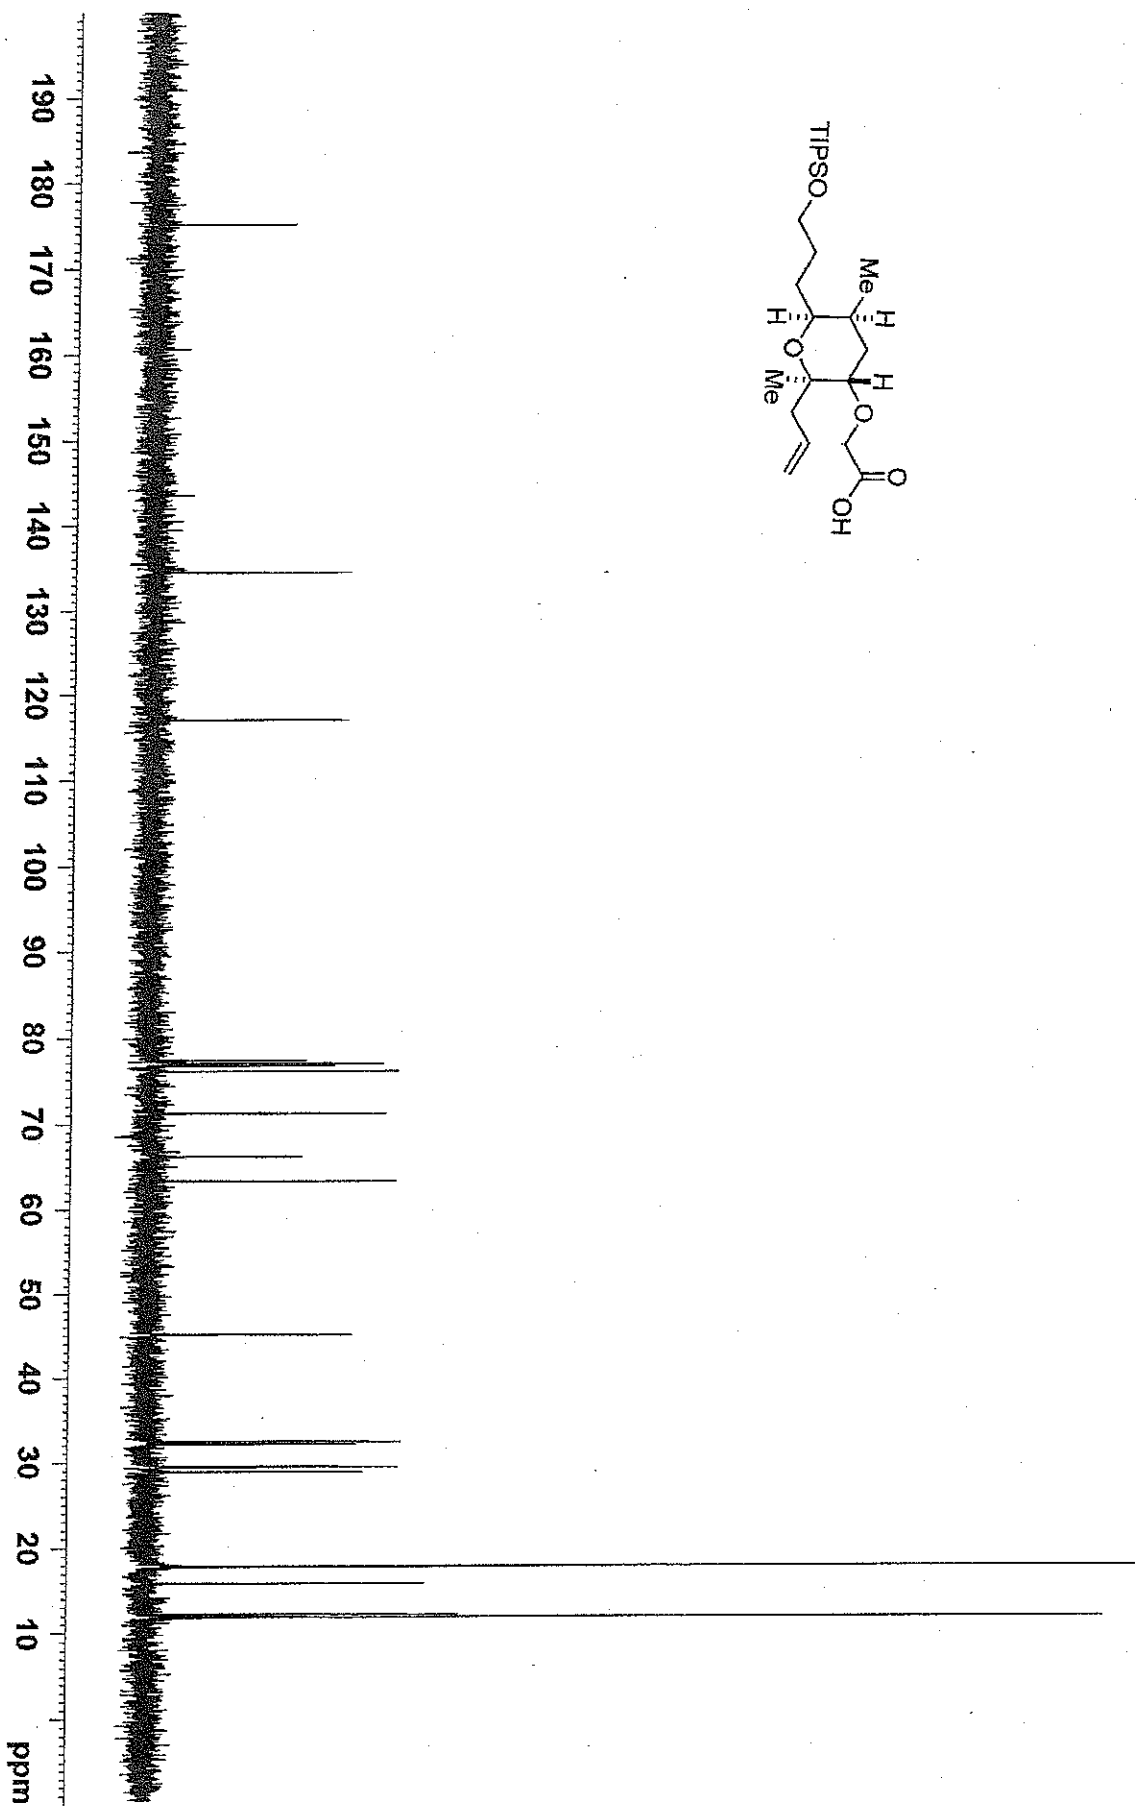



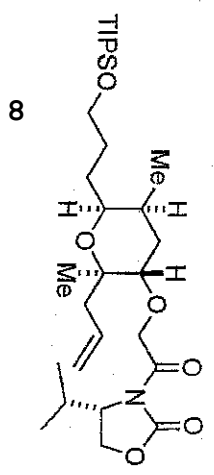

8

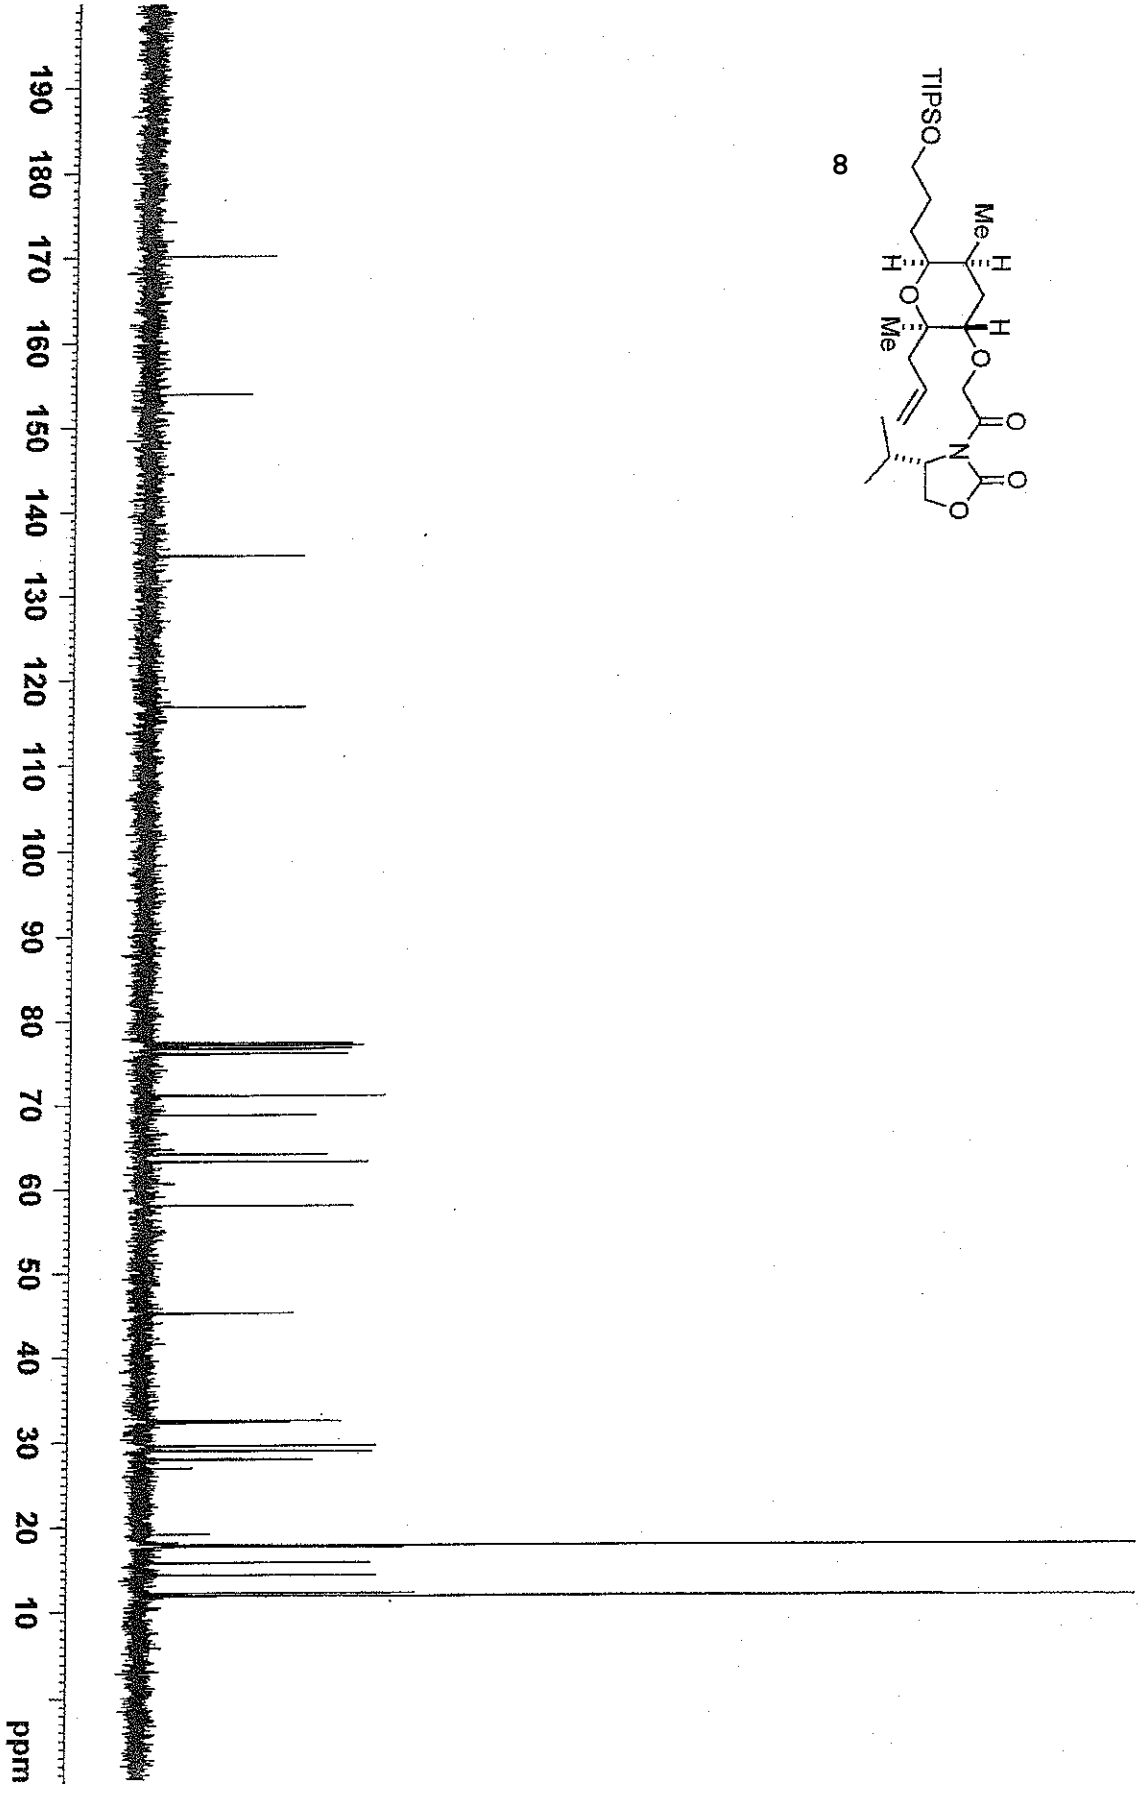

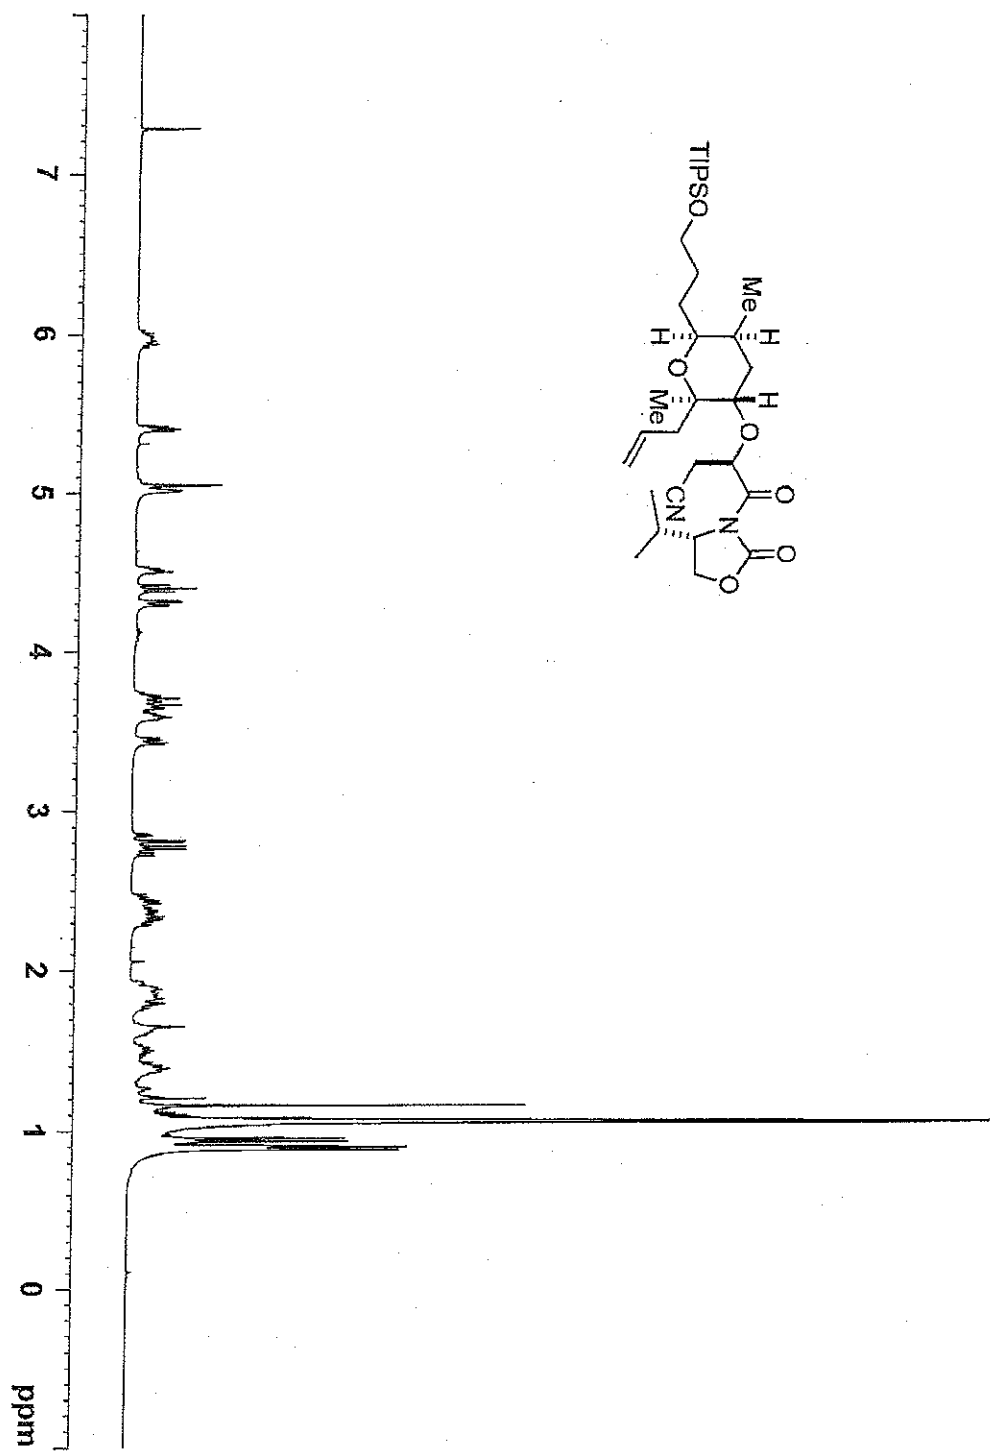



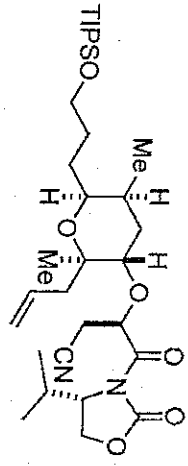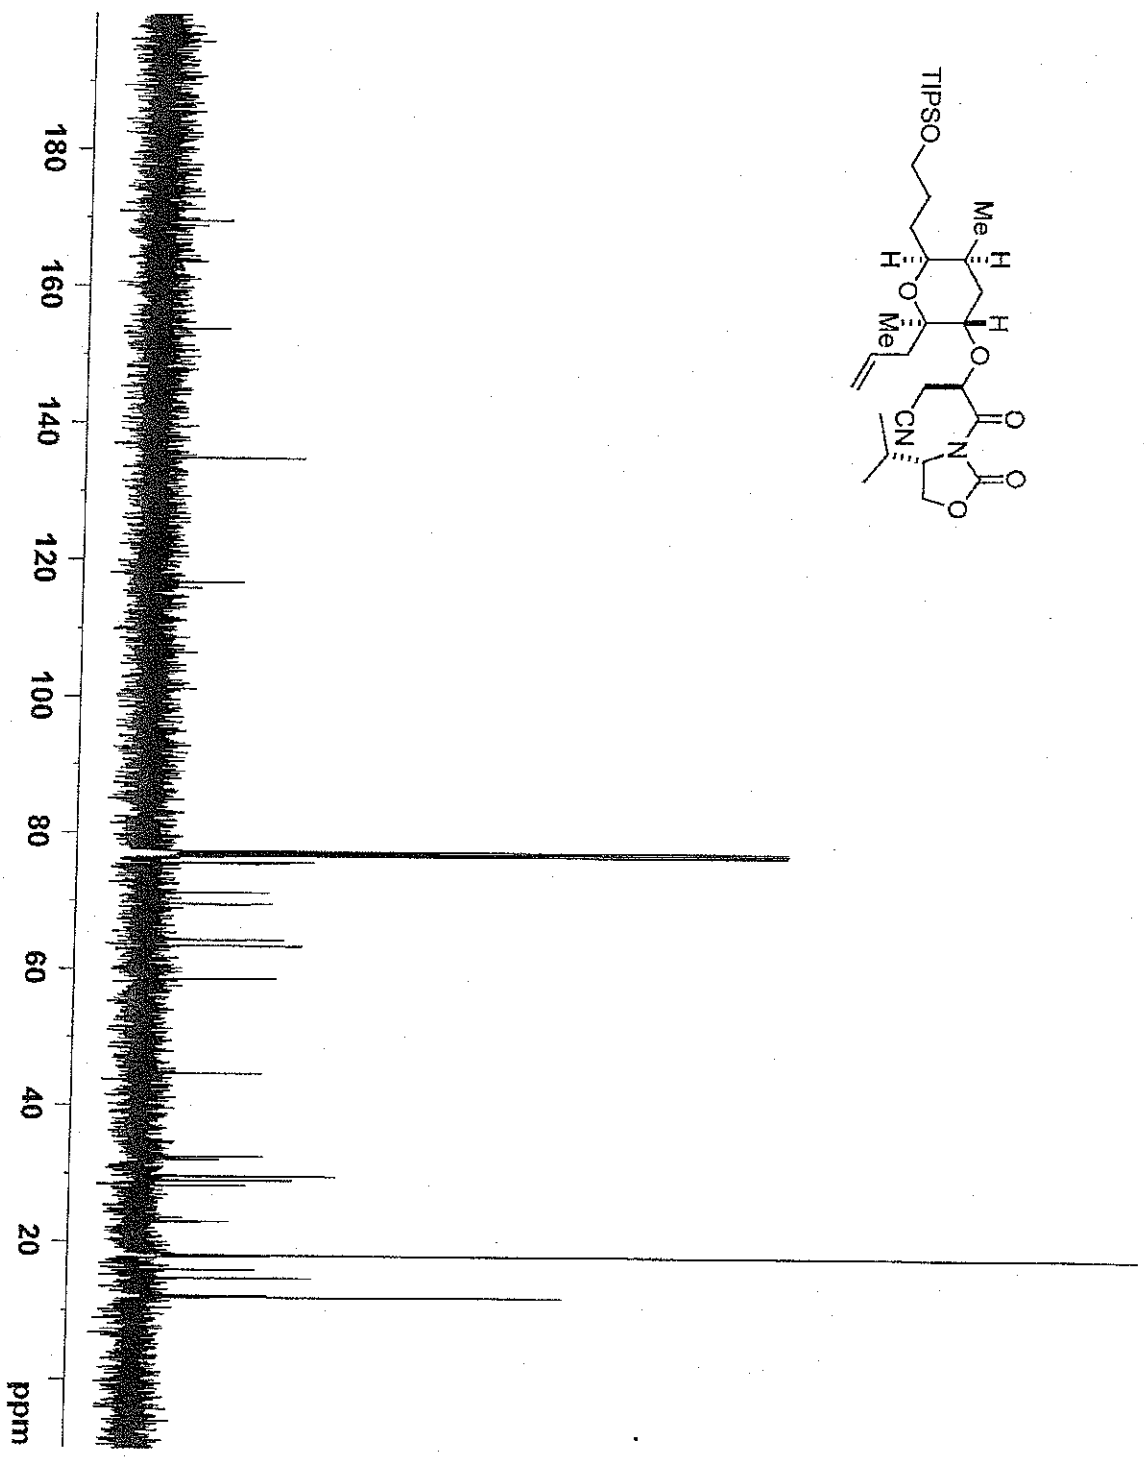

25

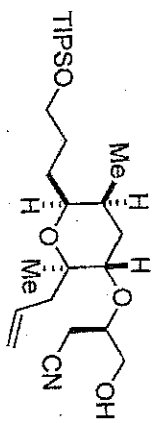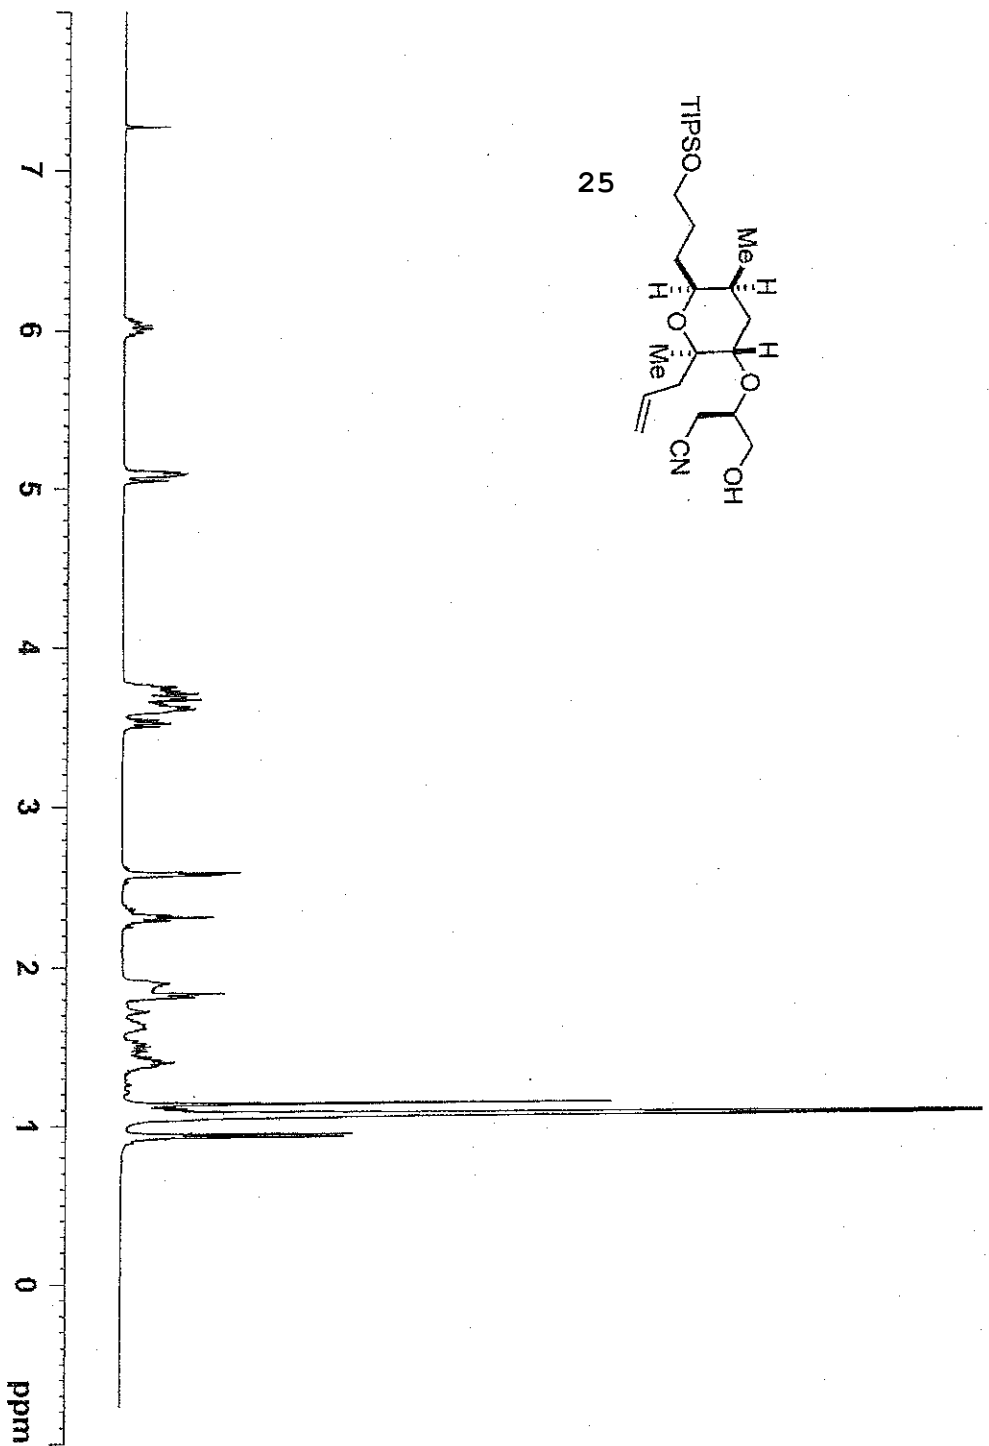

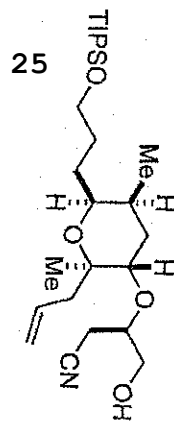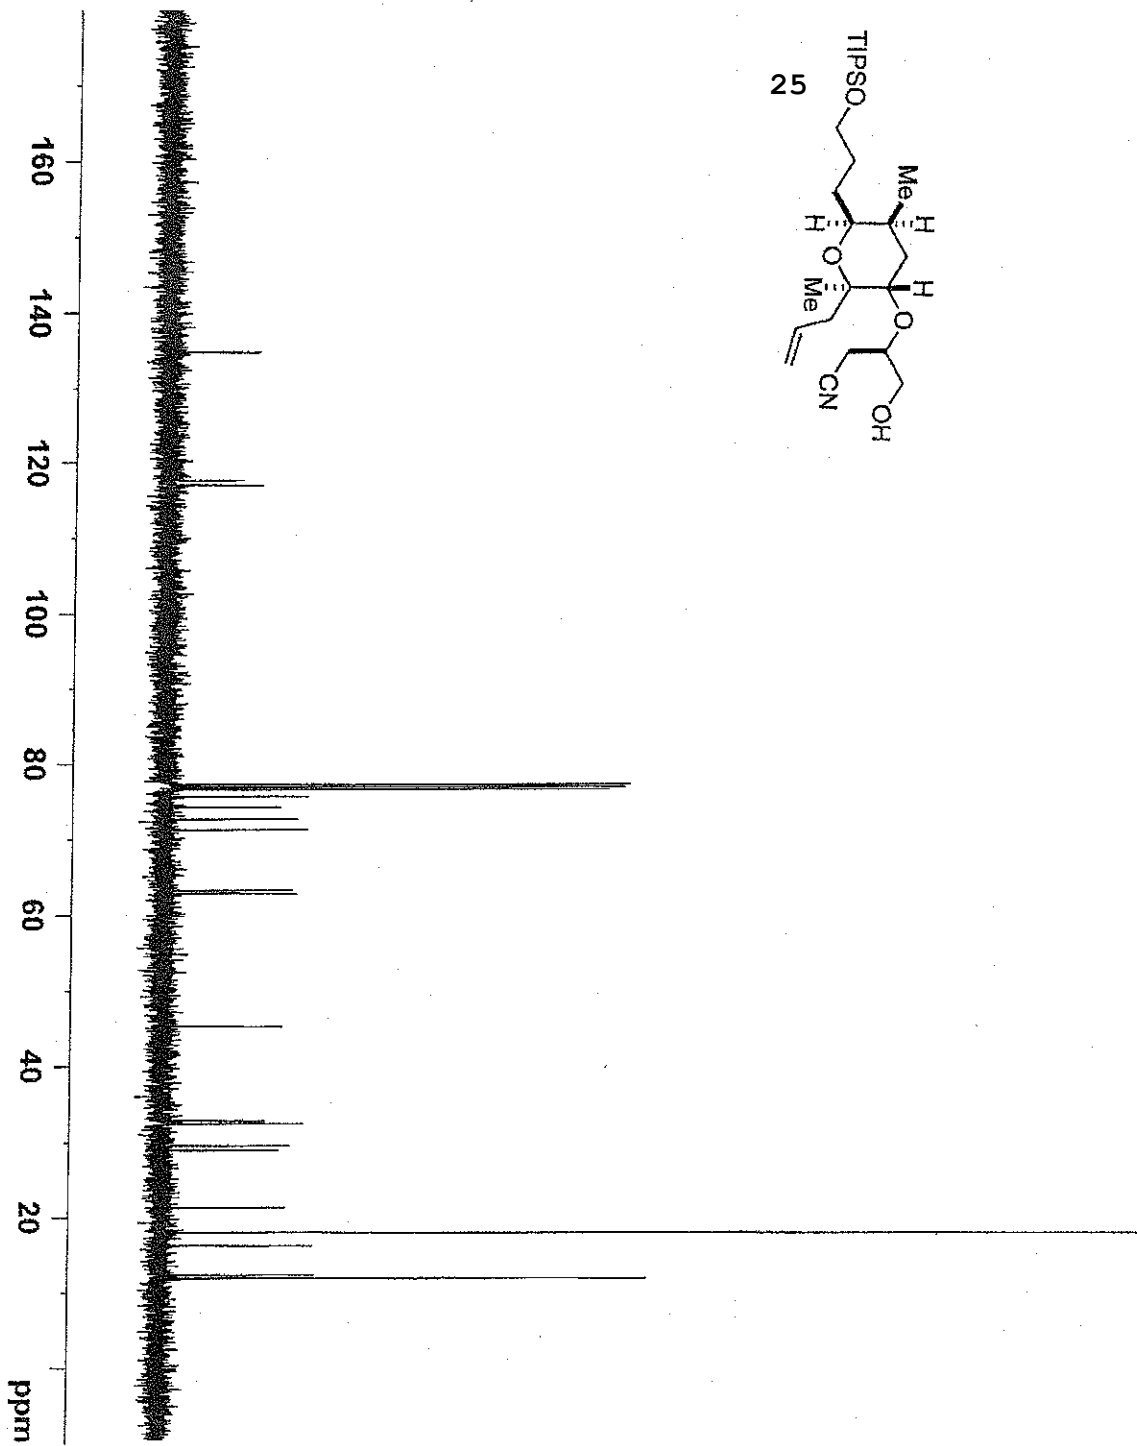

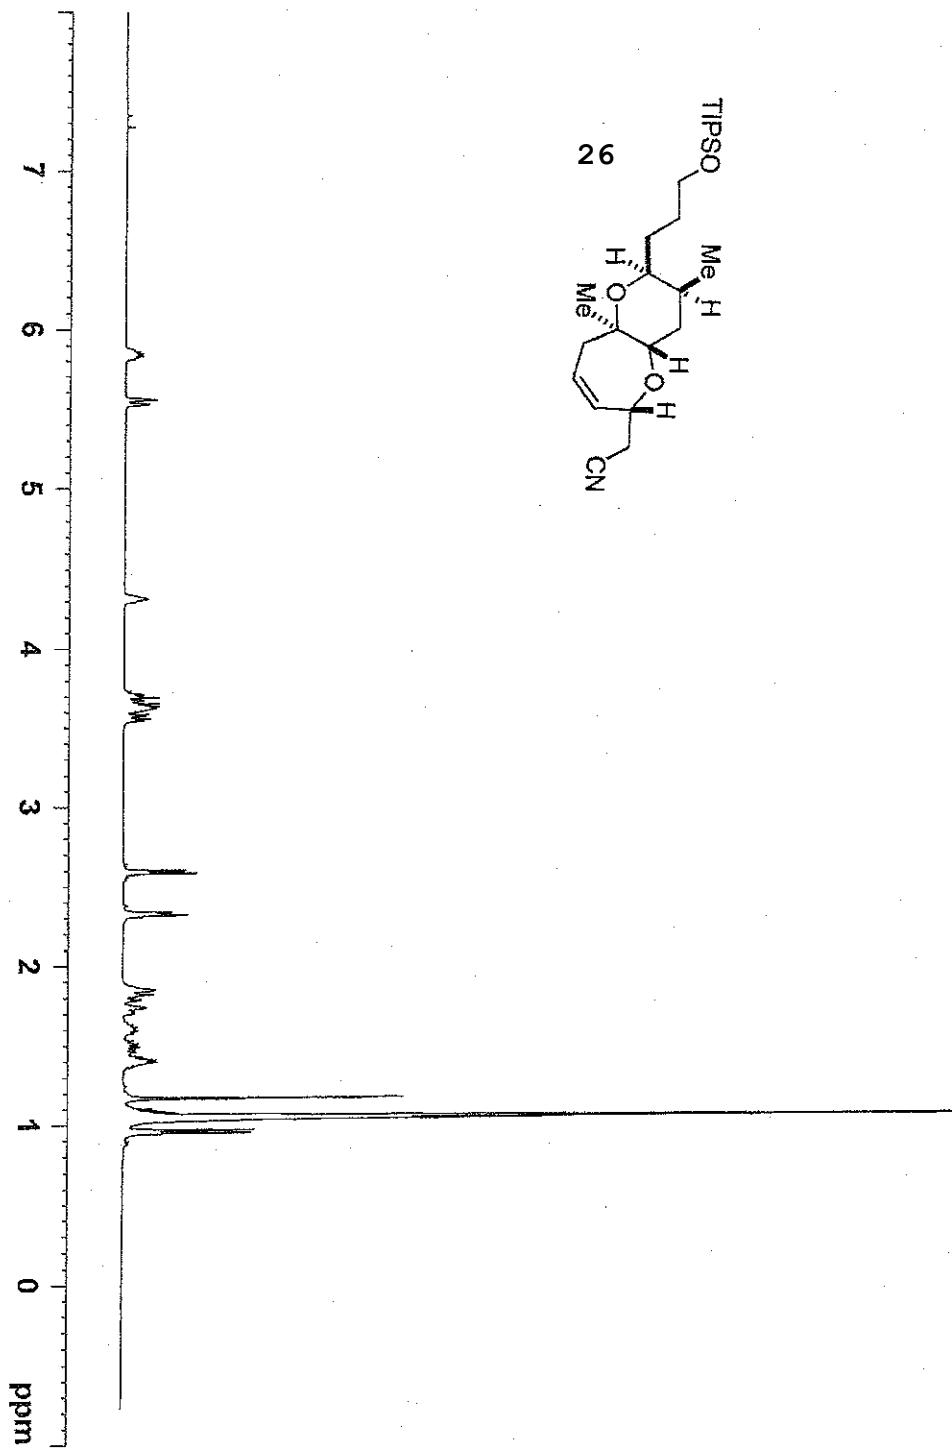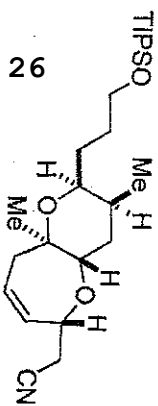

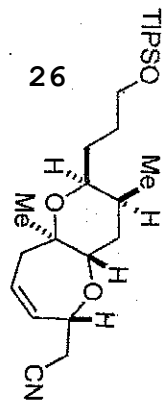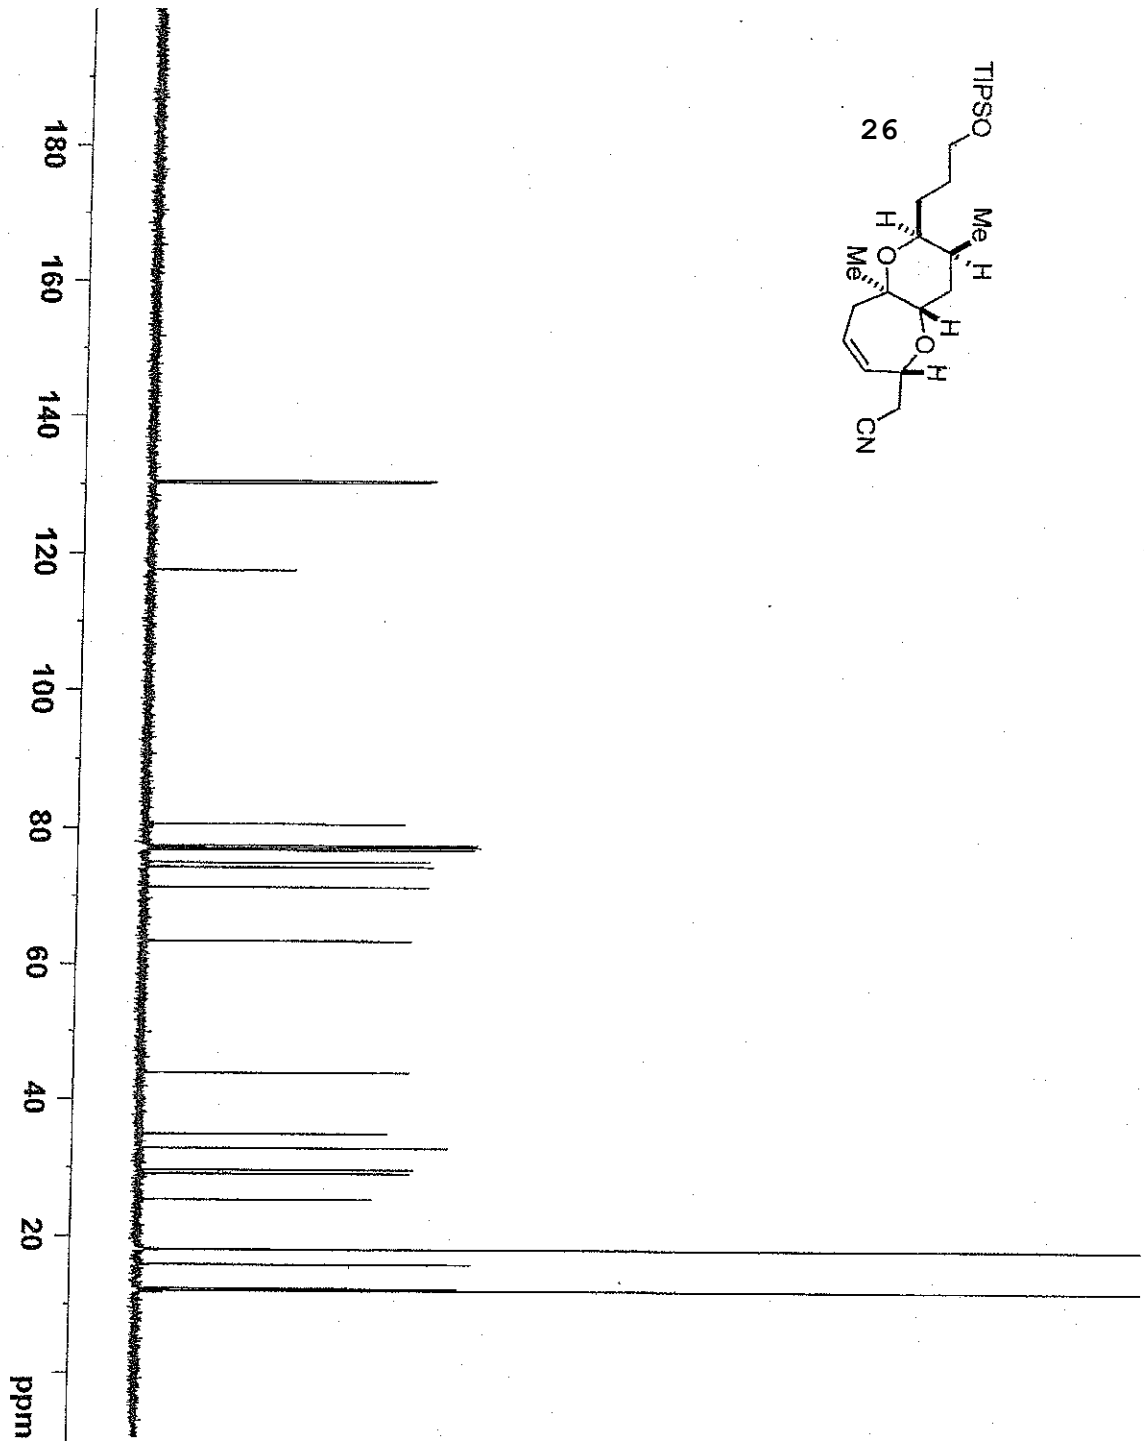

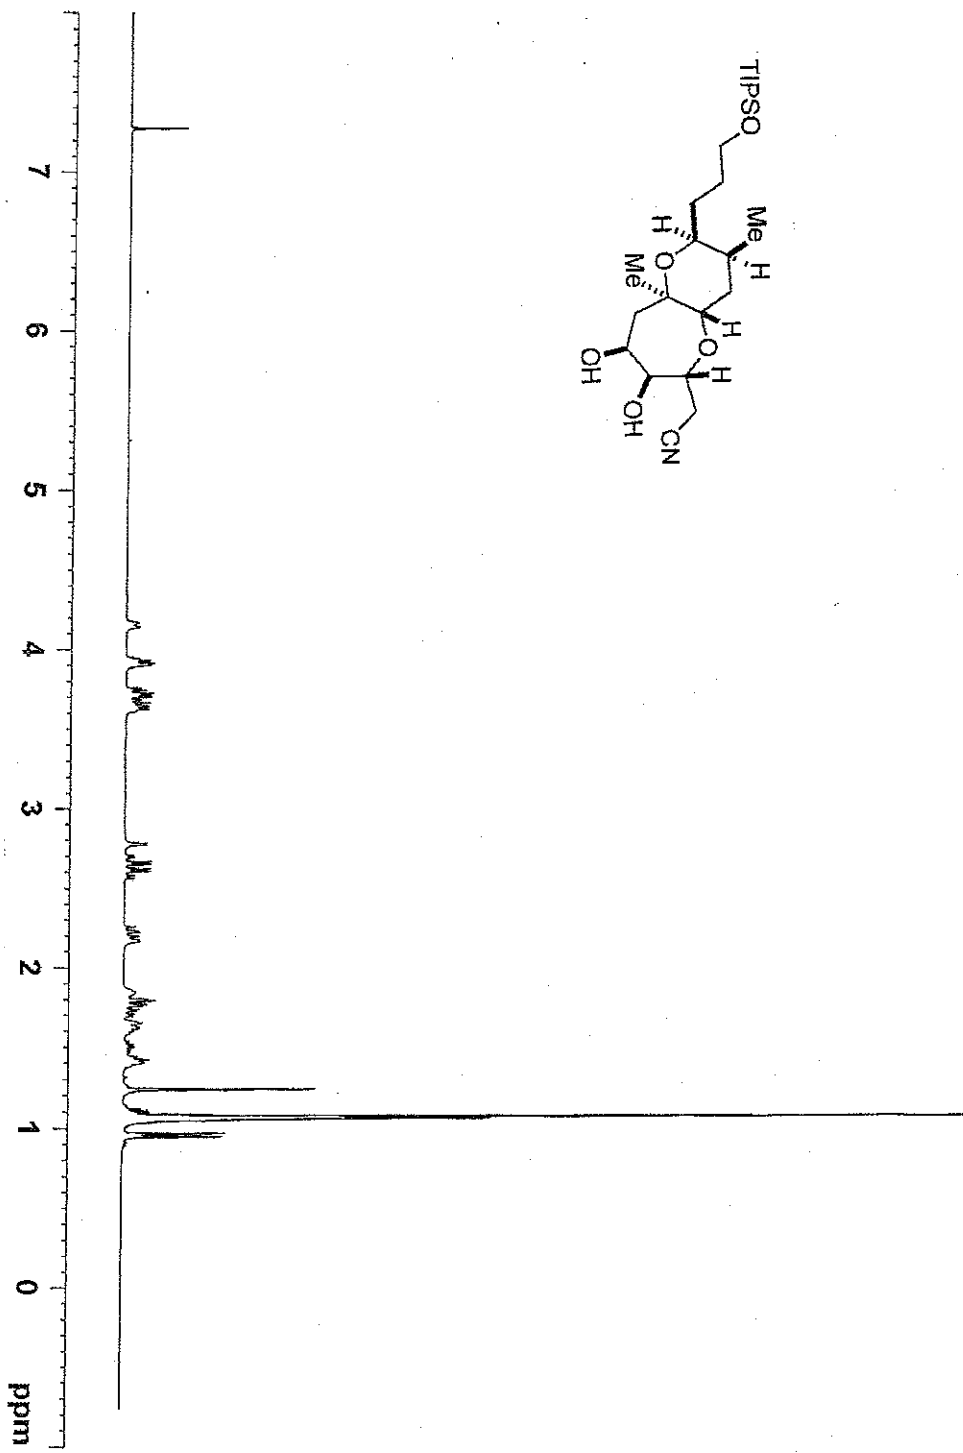

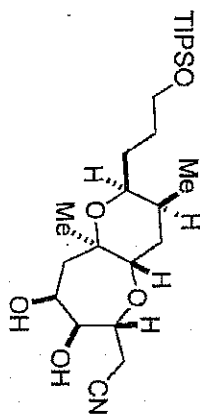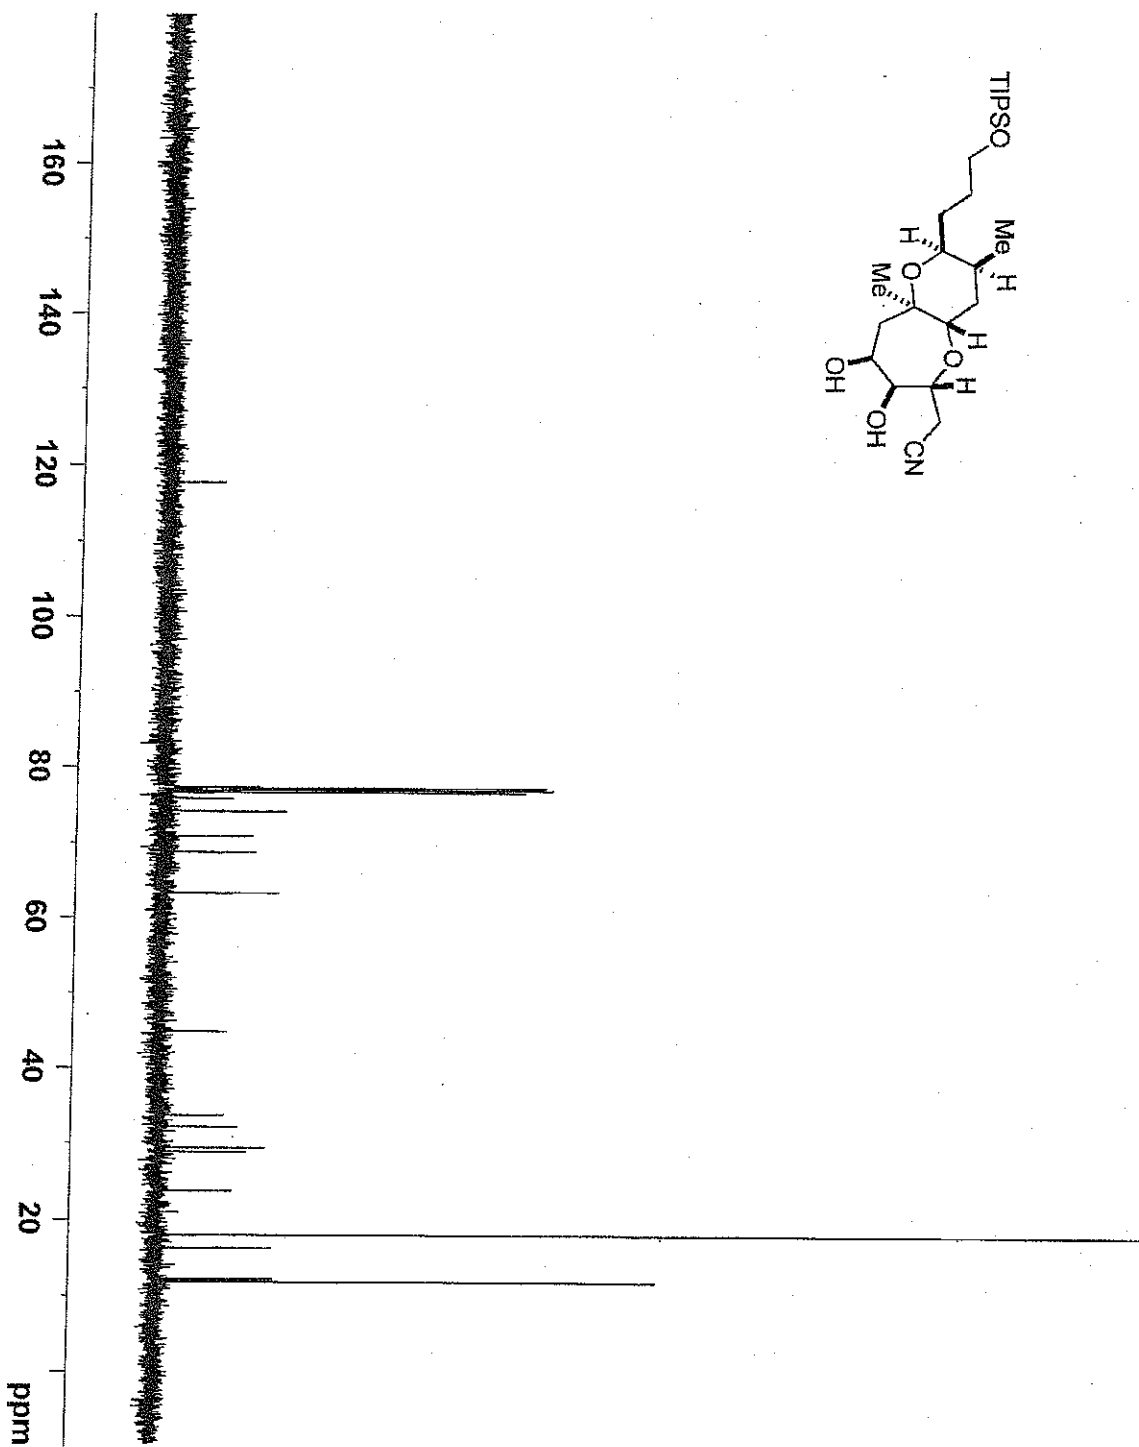

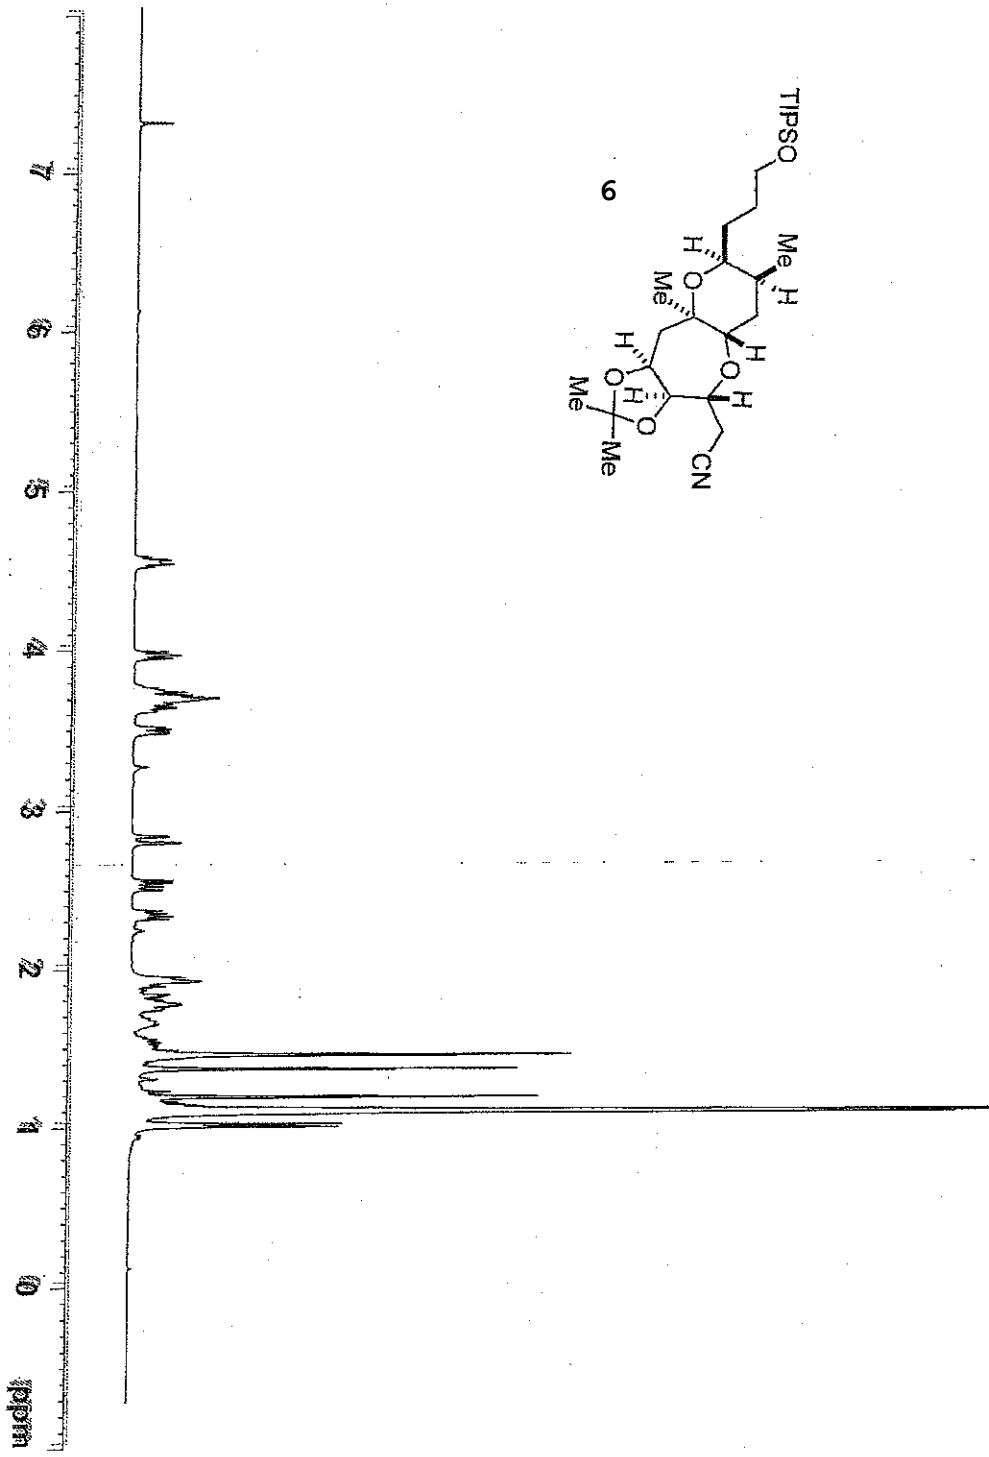



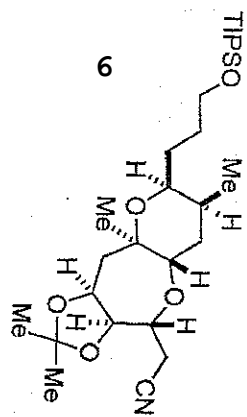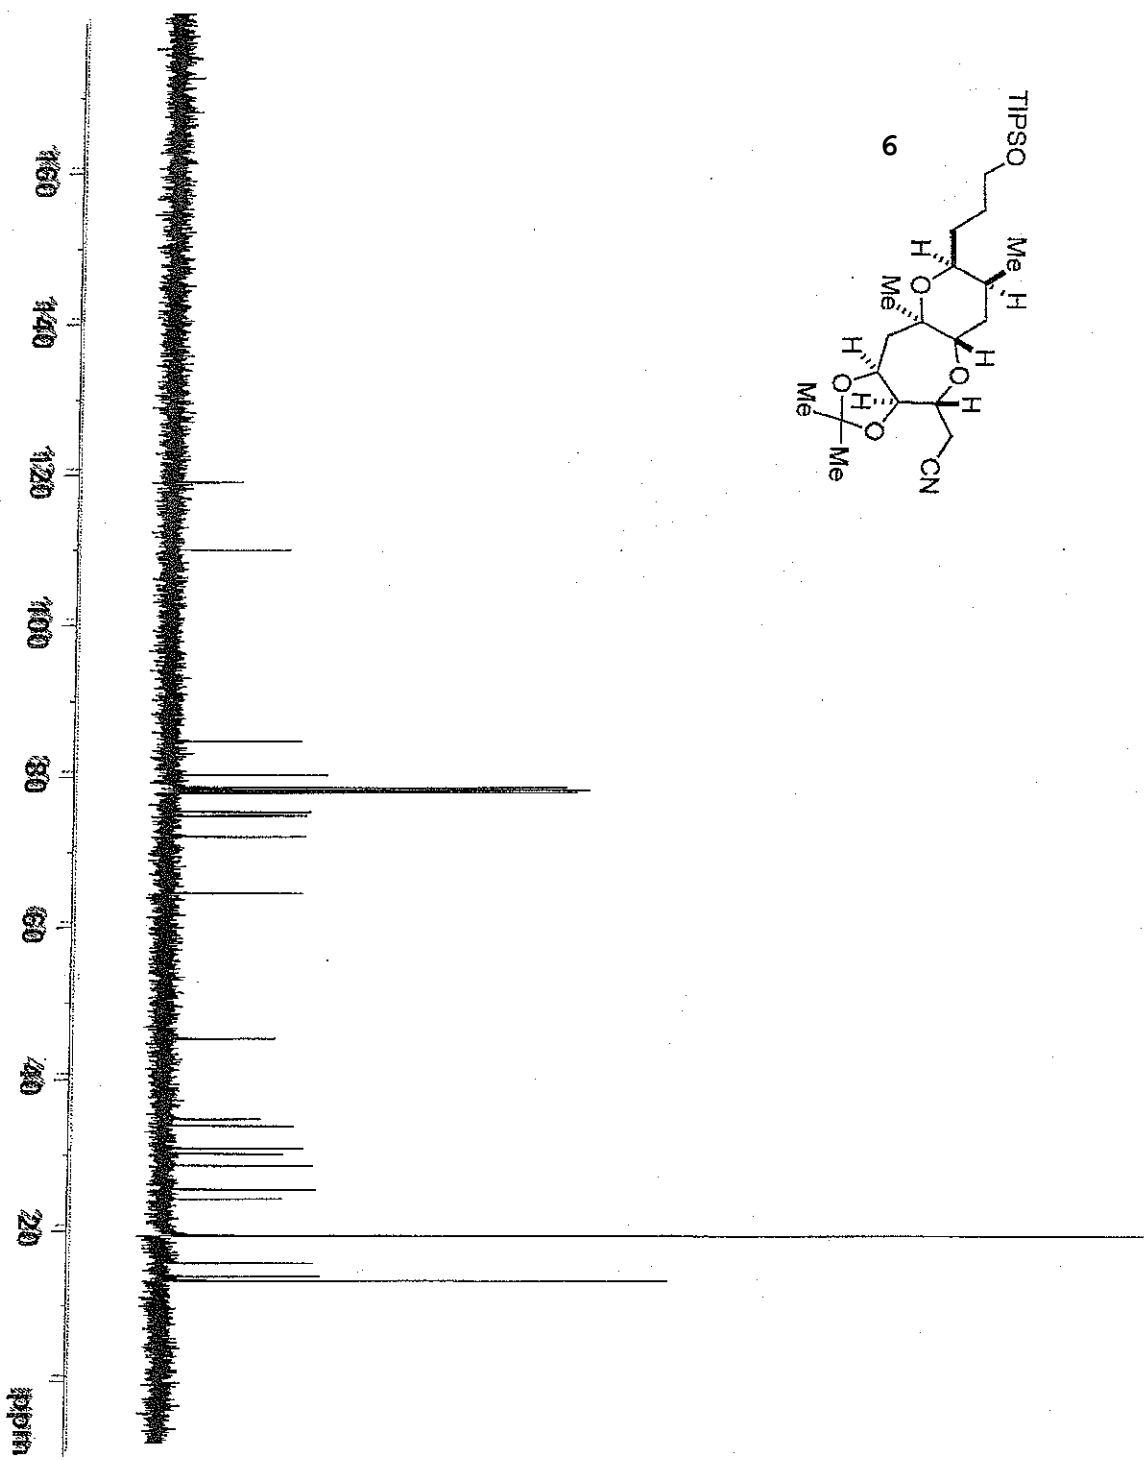

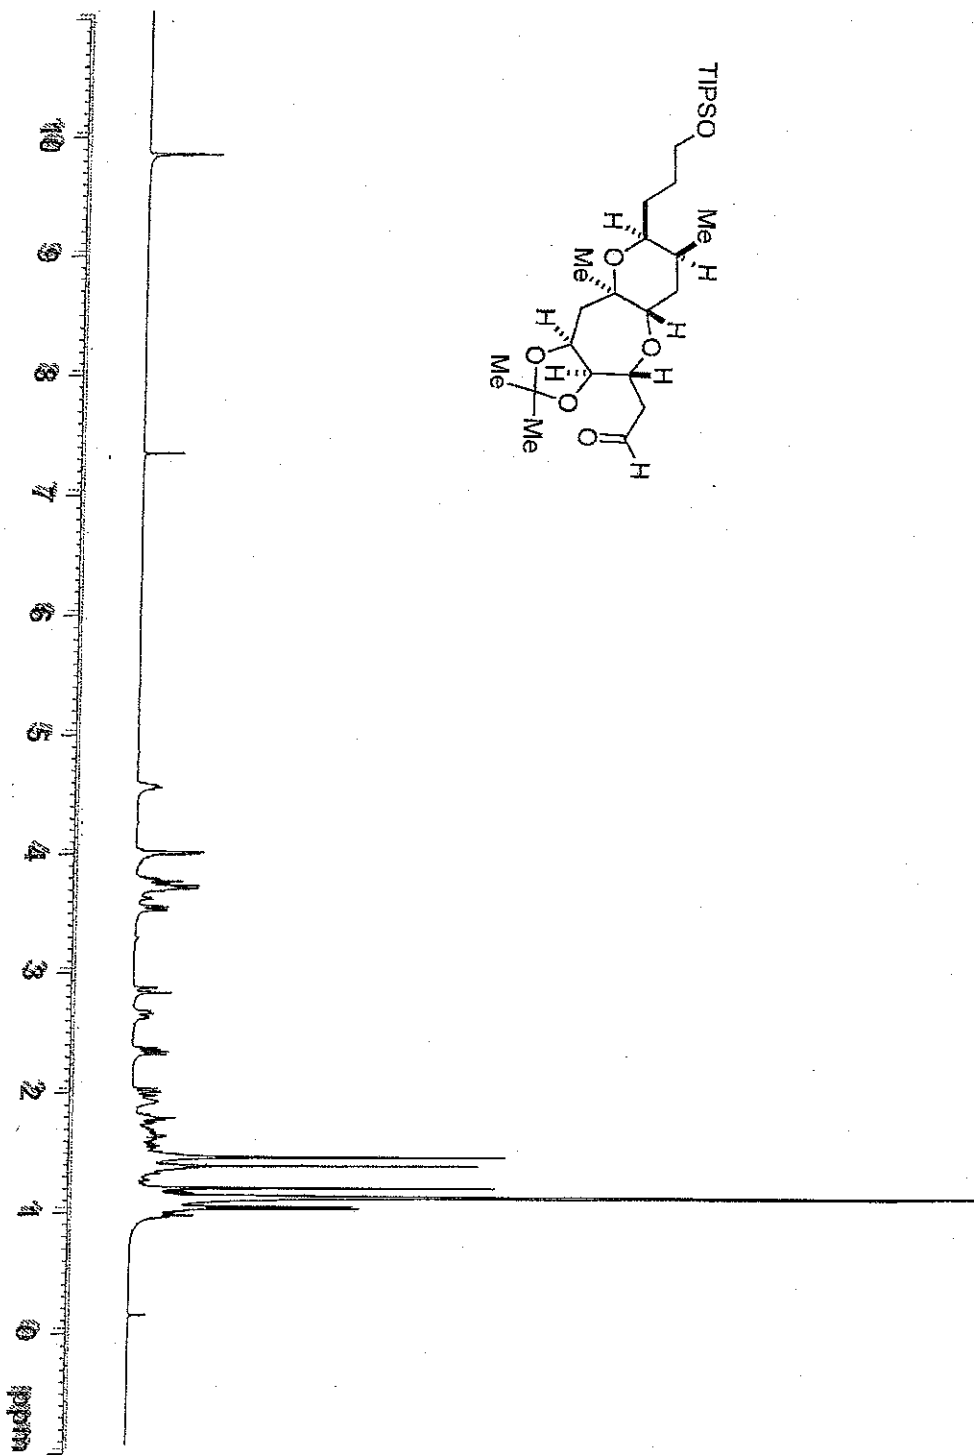

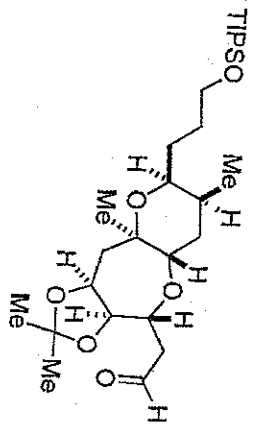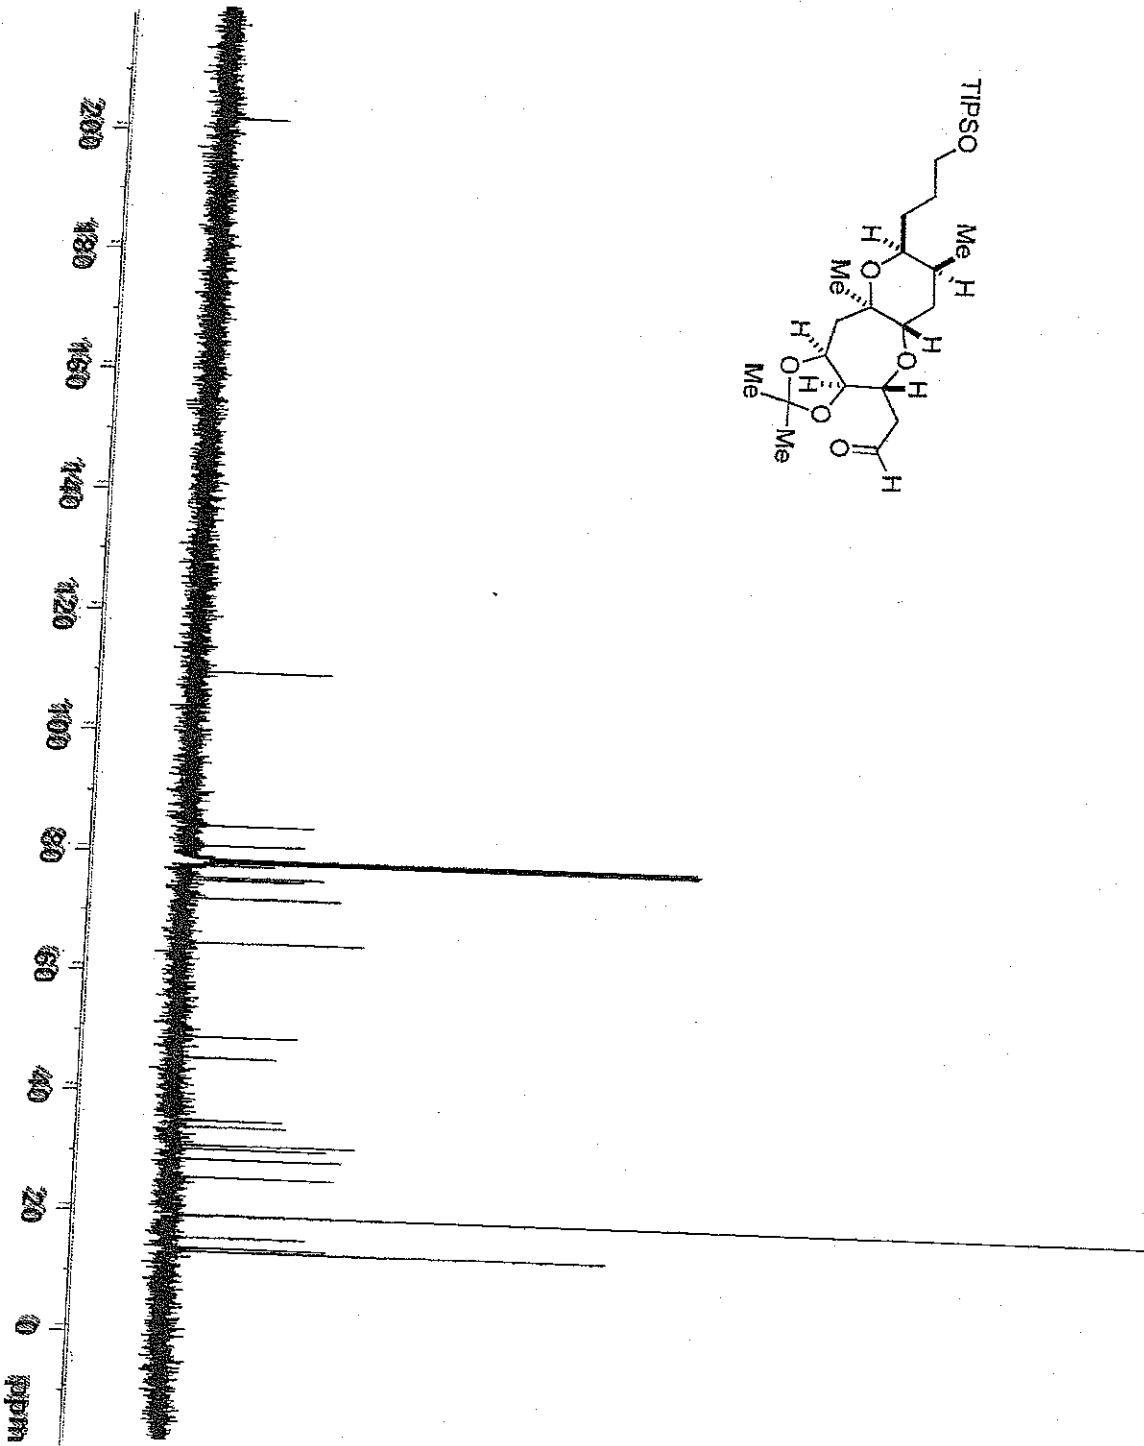

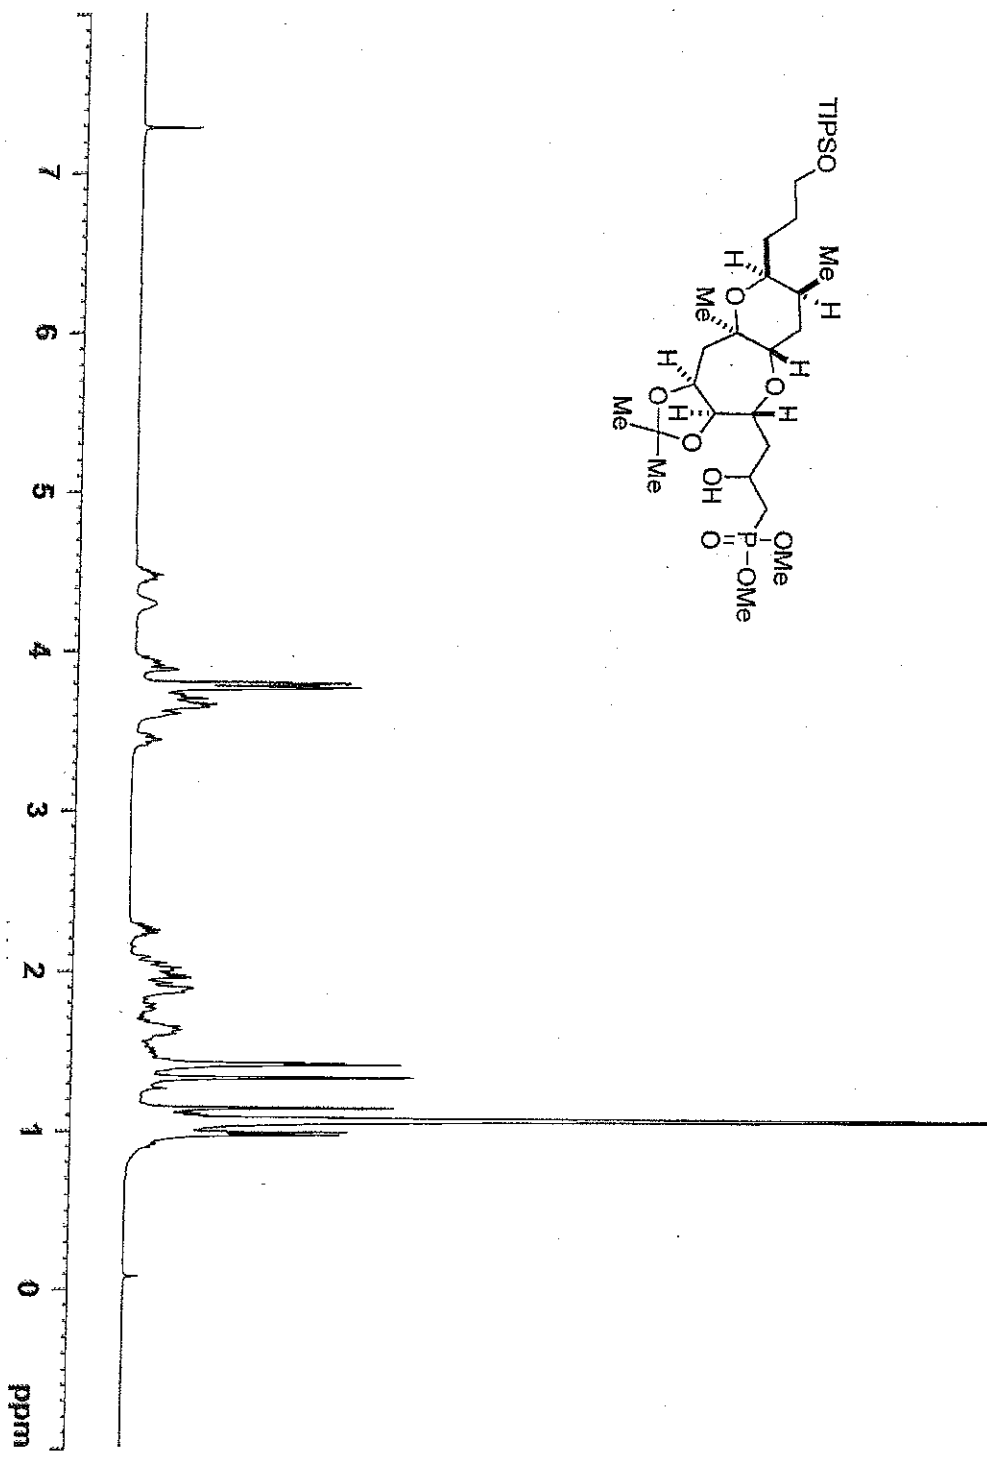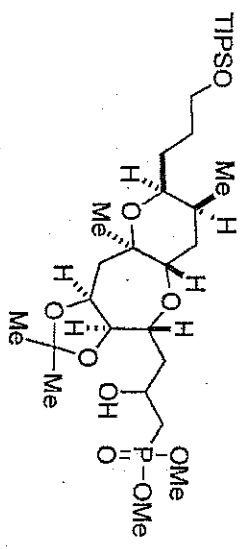



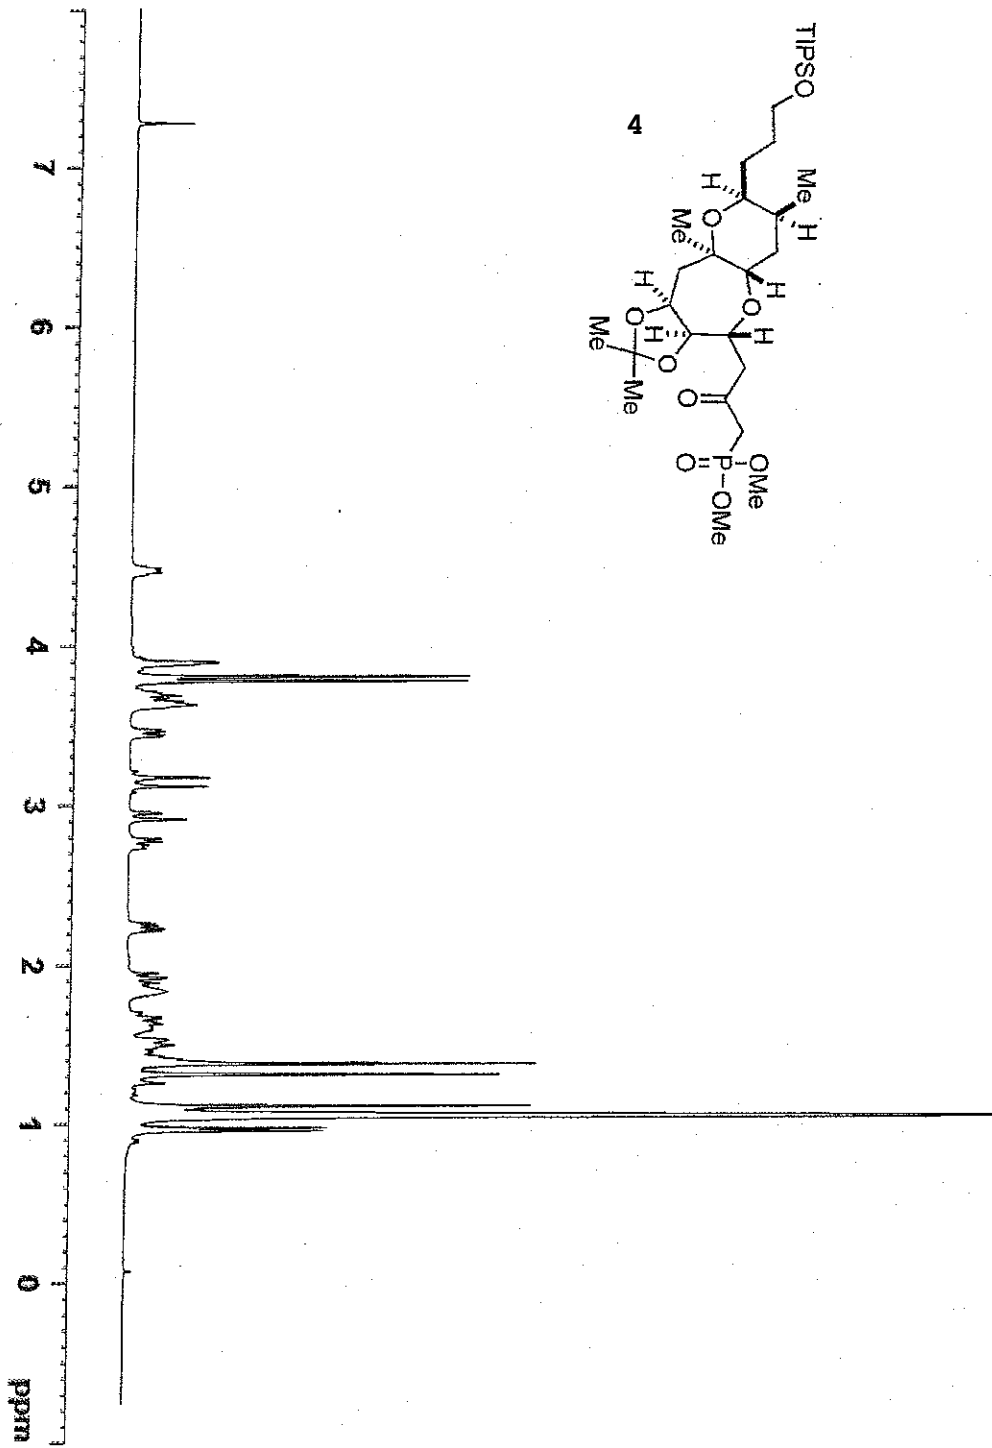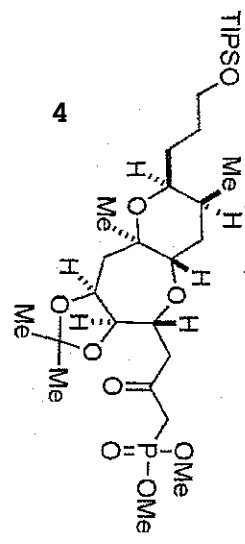

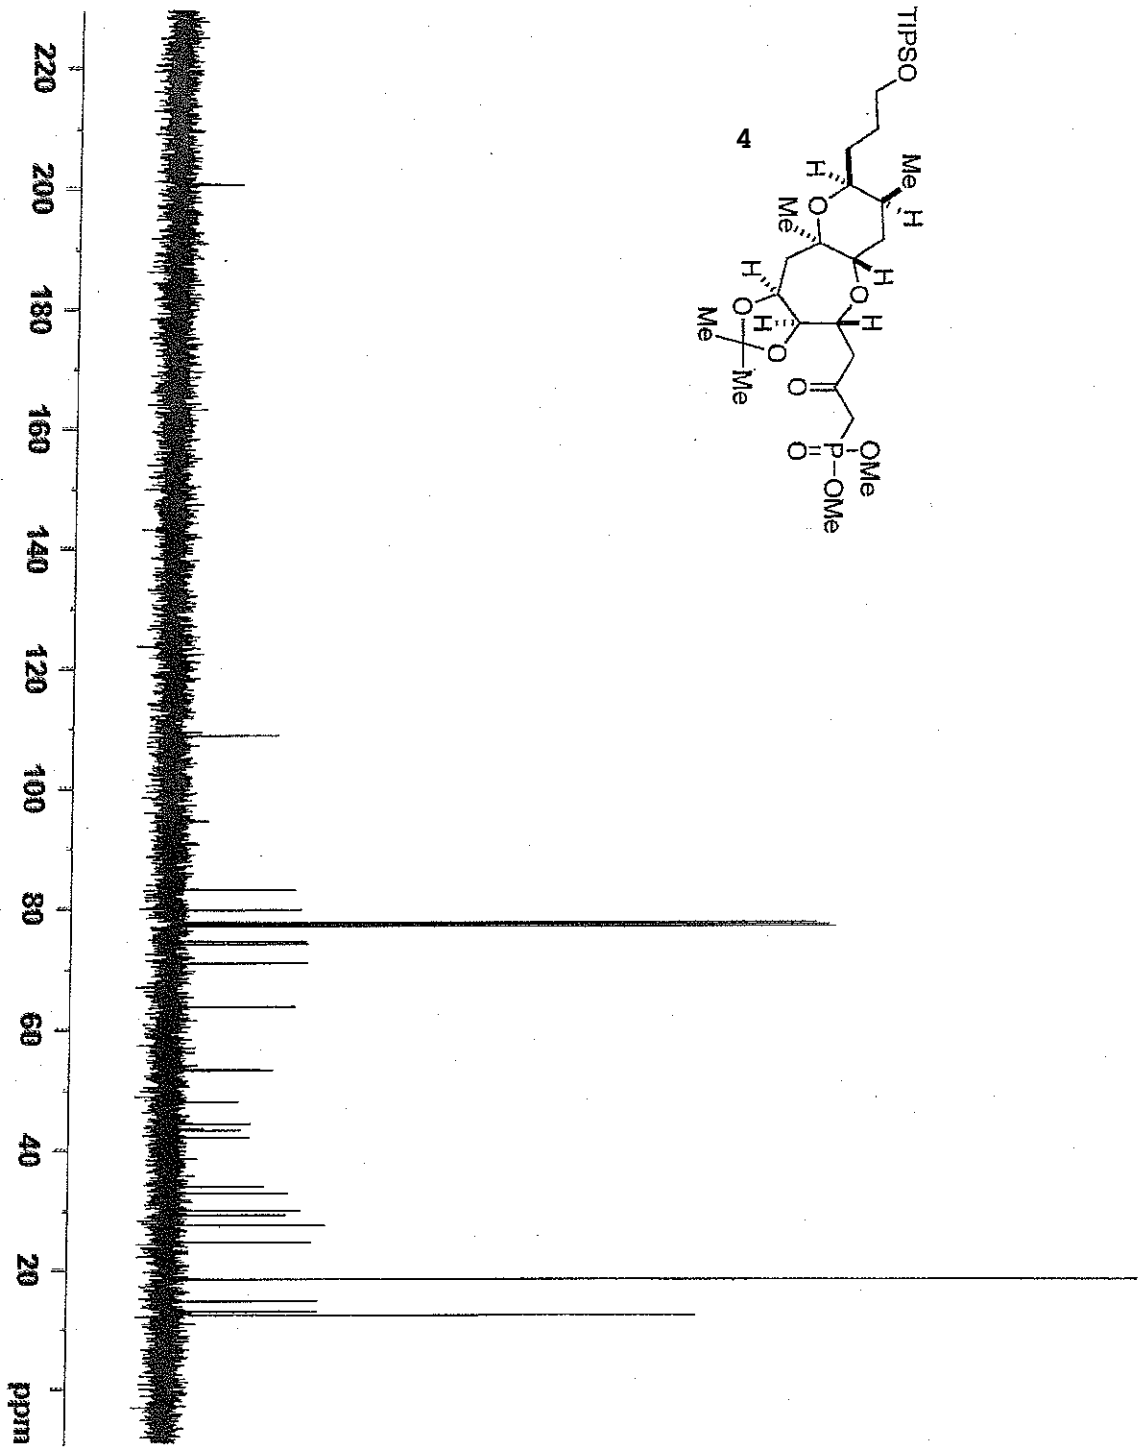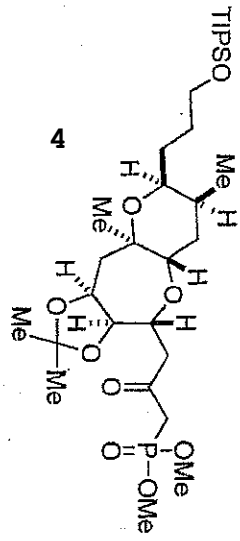

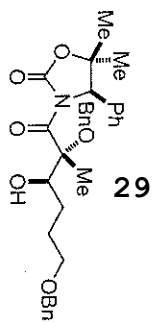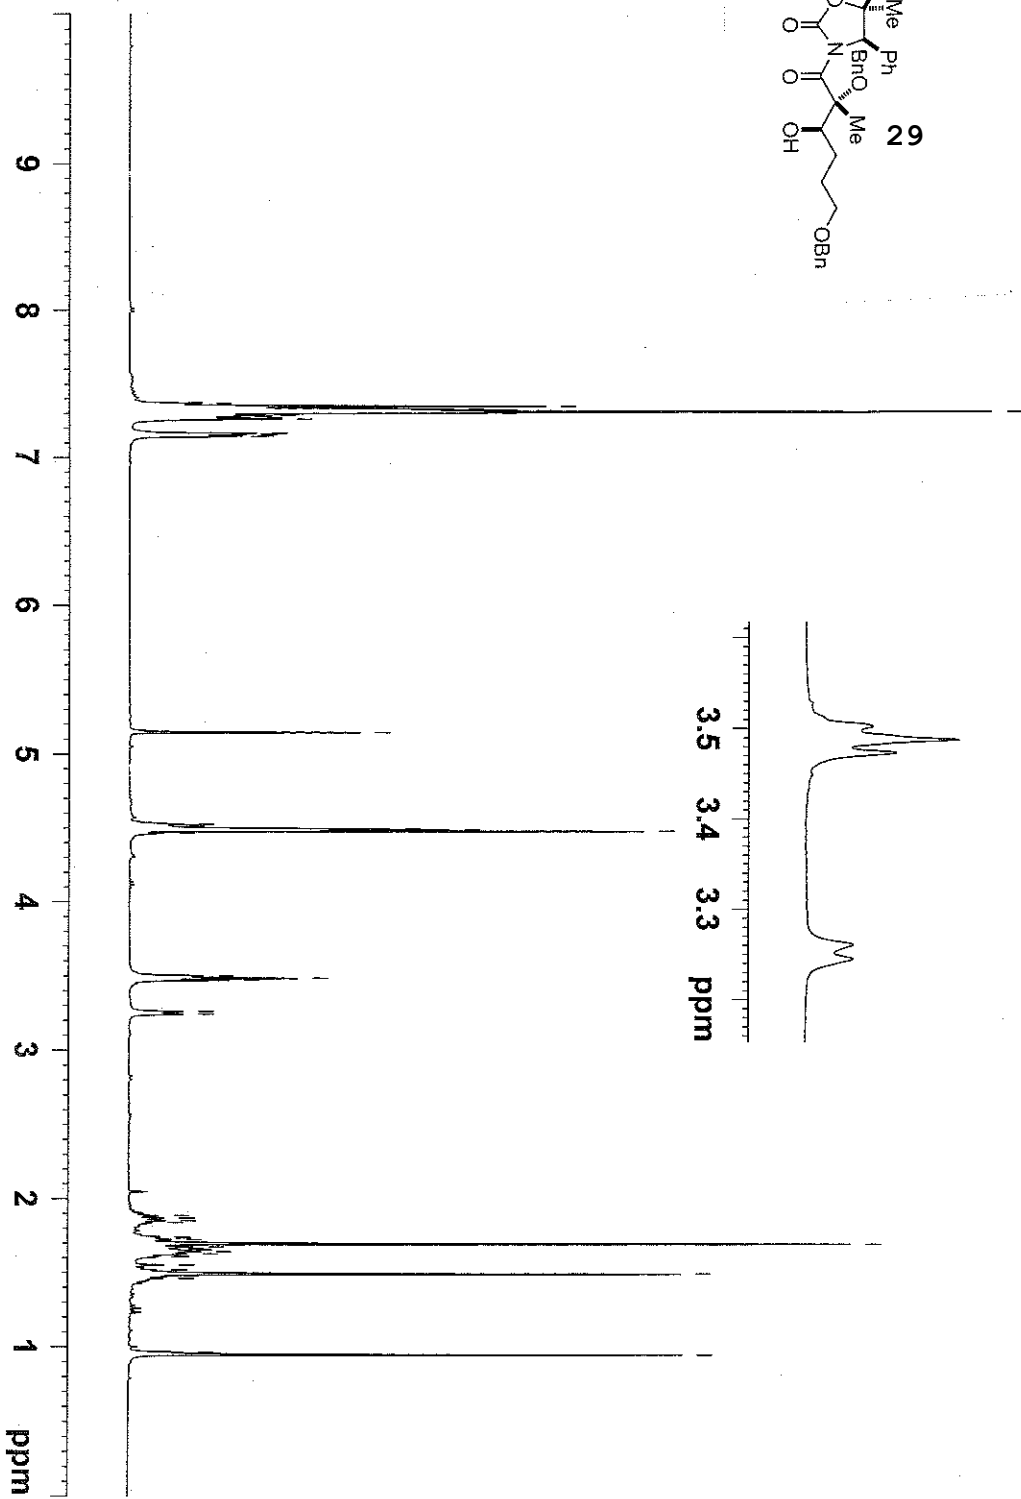



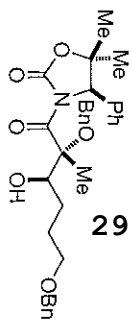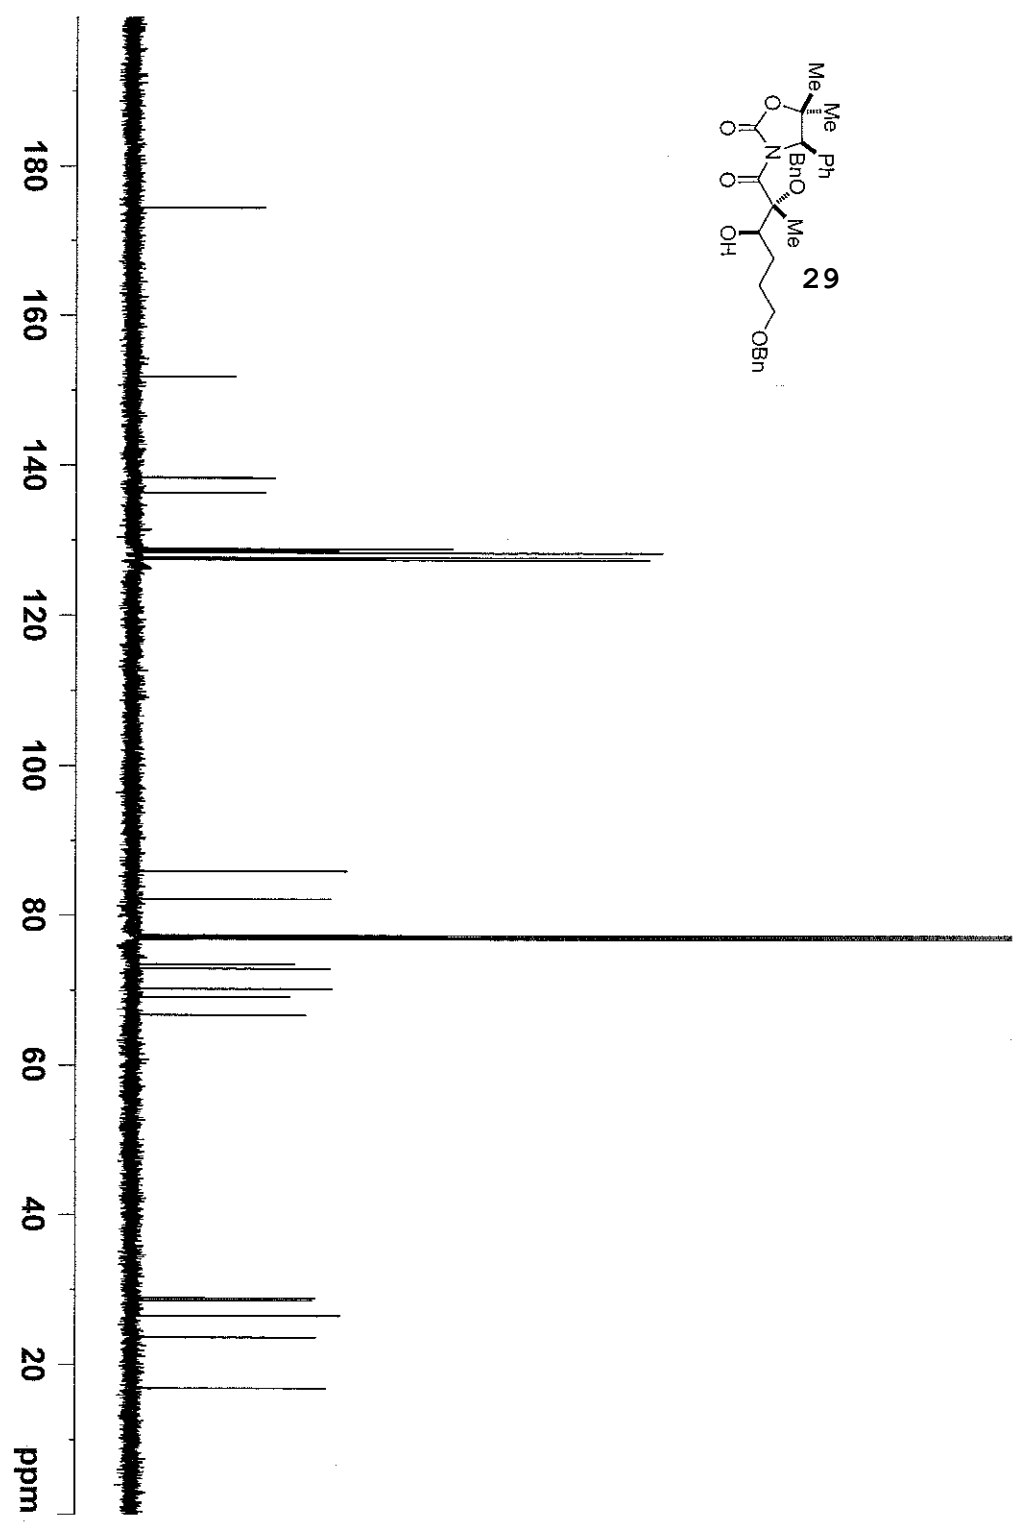

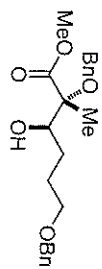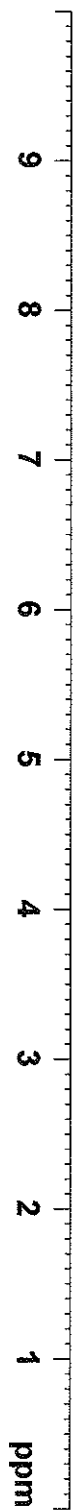

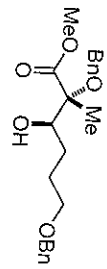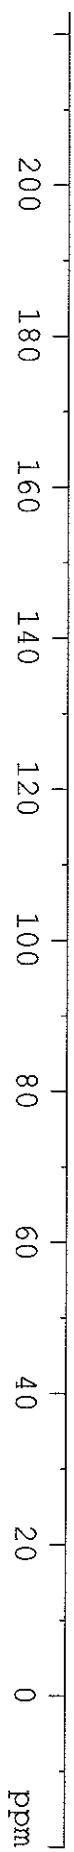

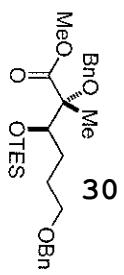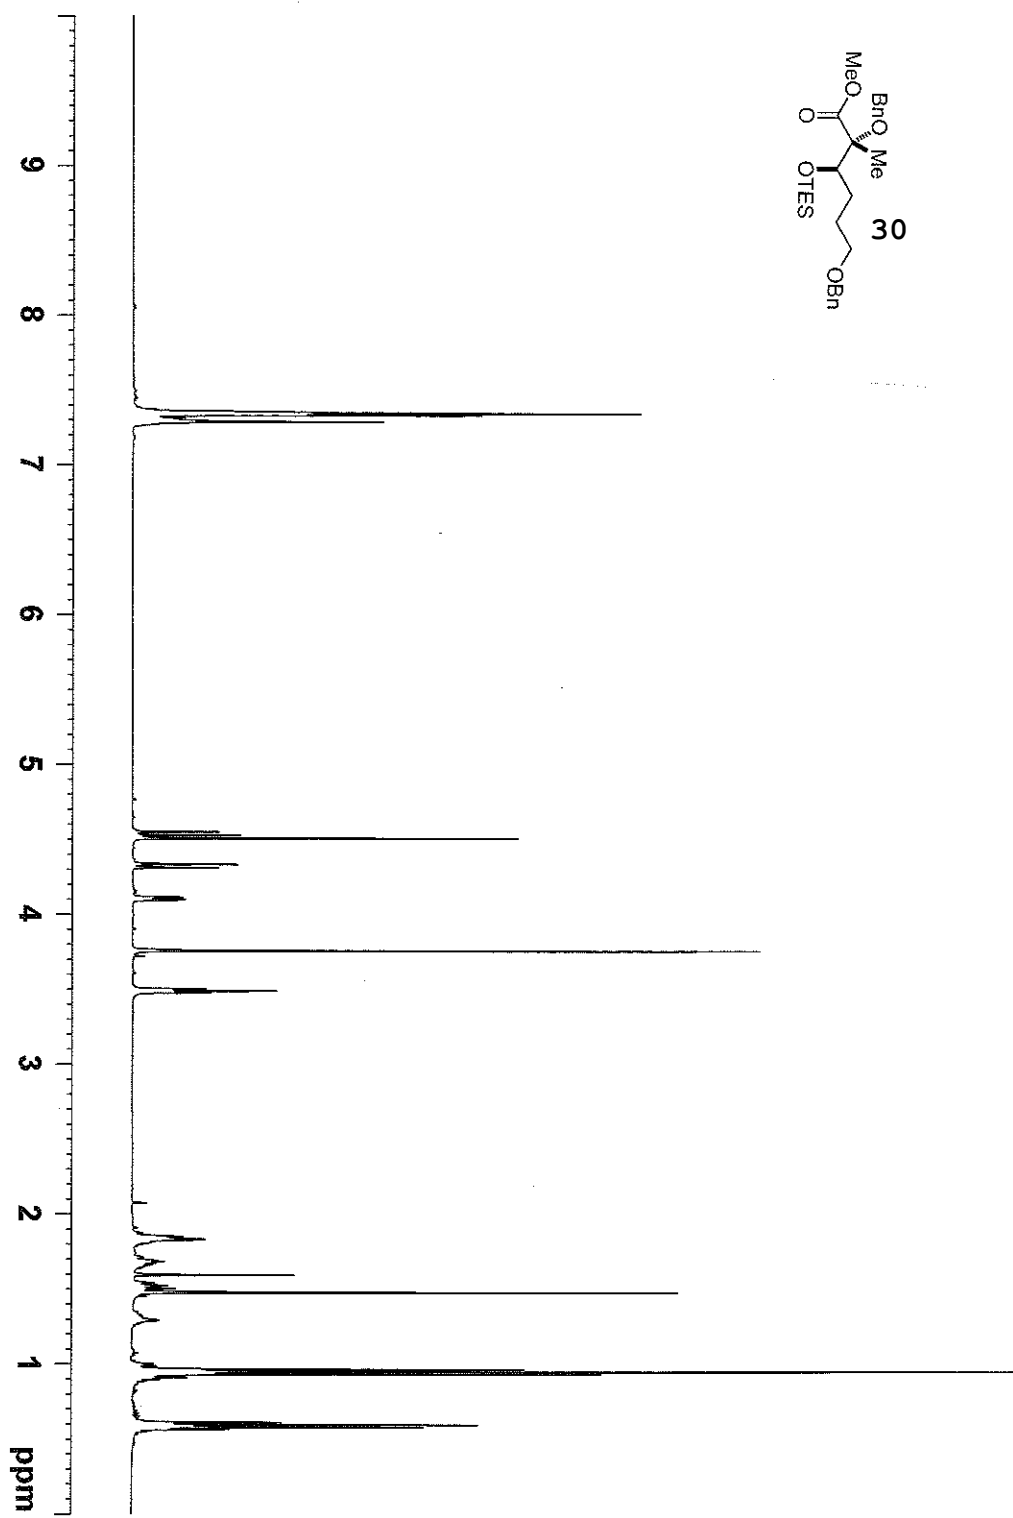

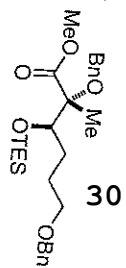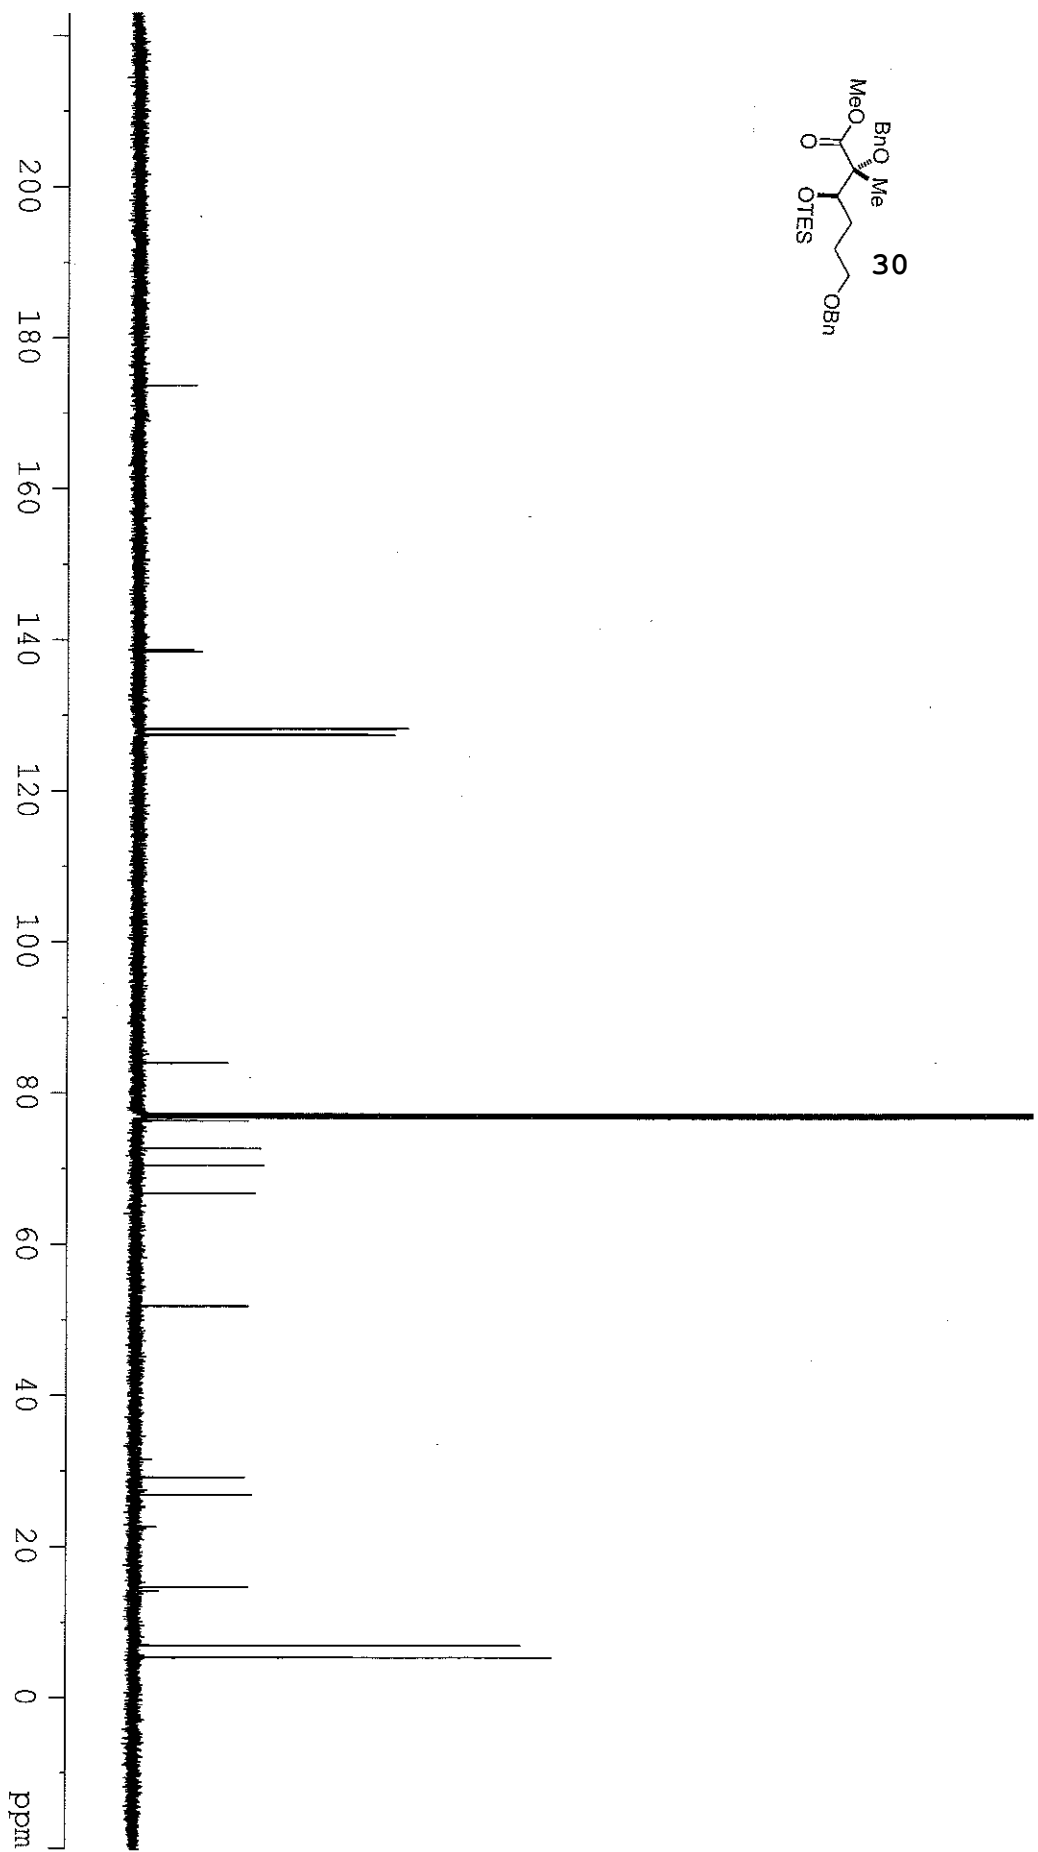



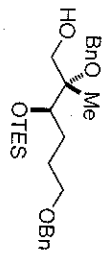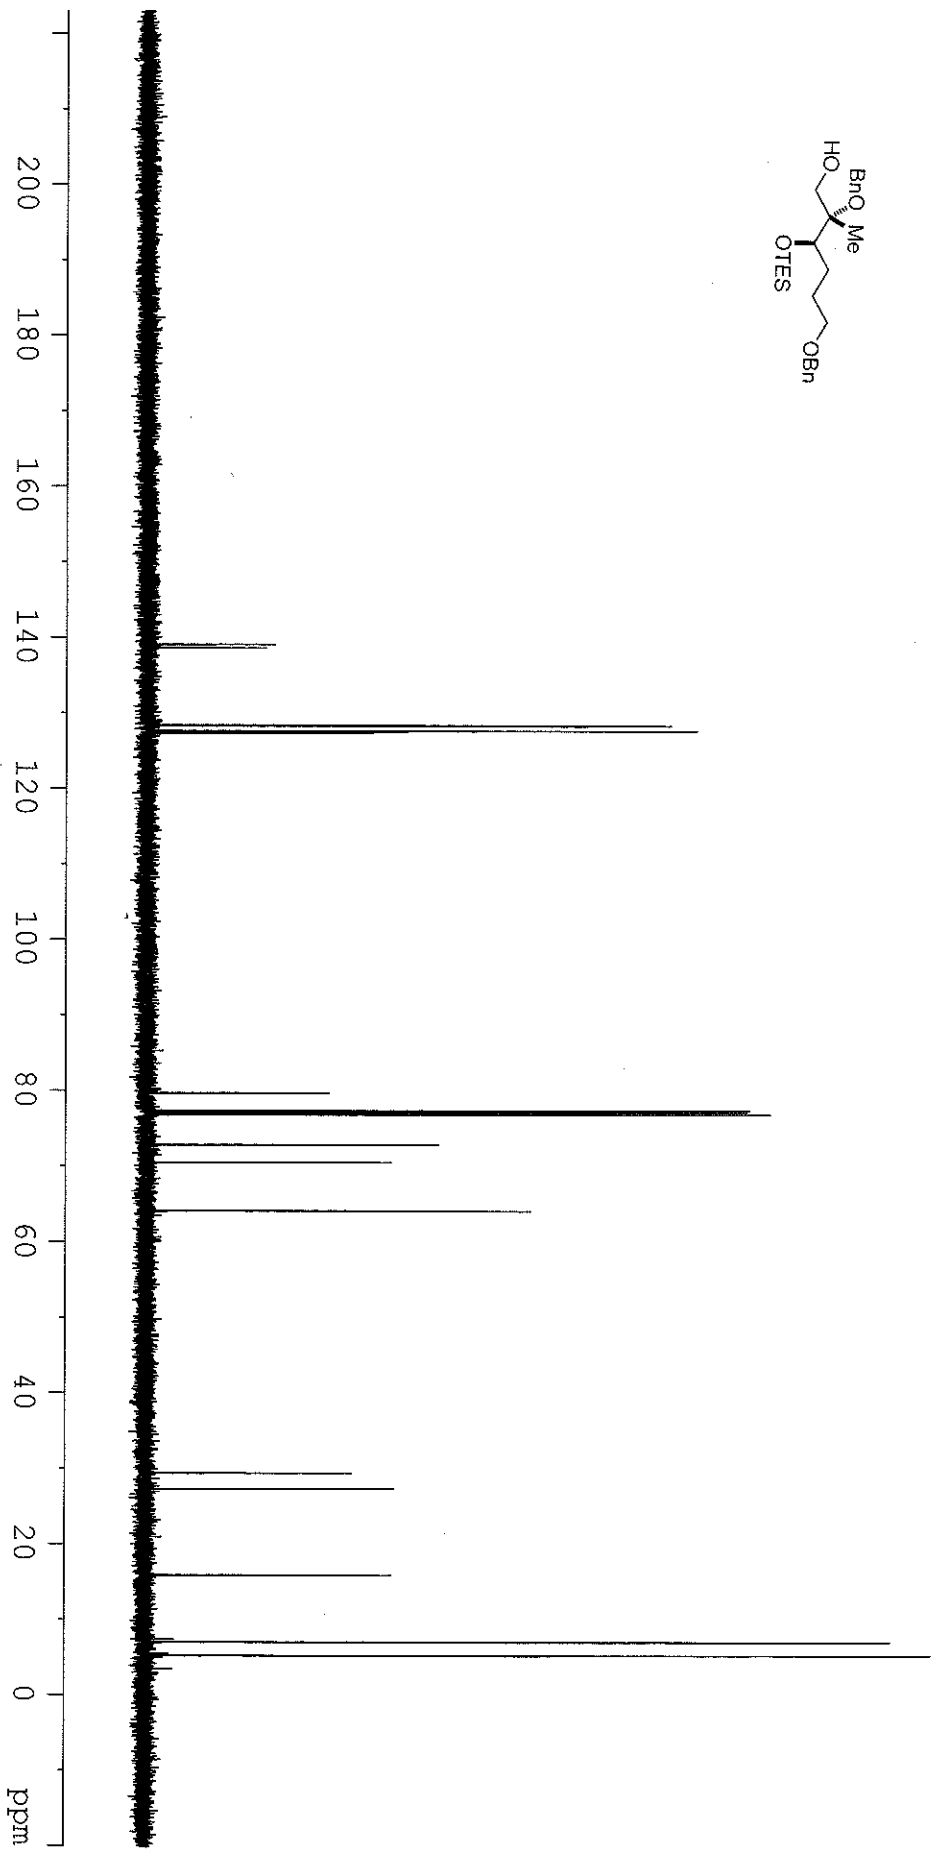

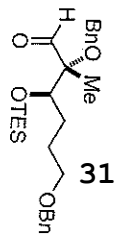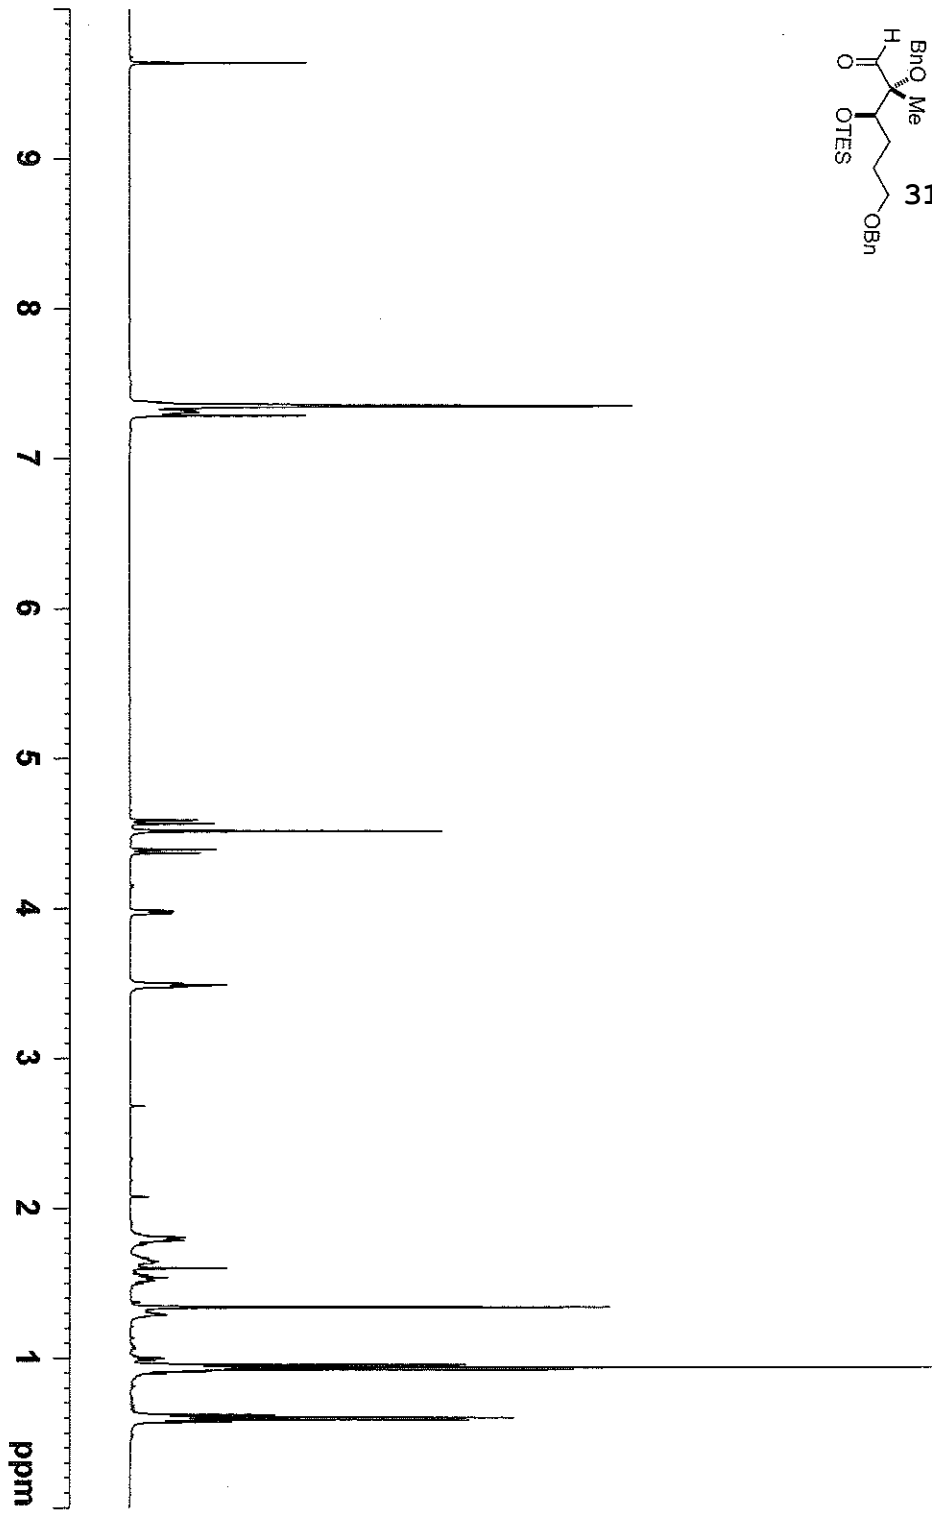



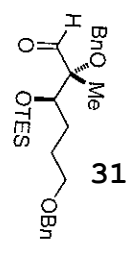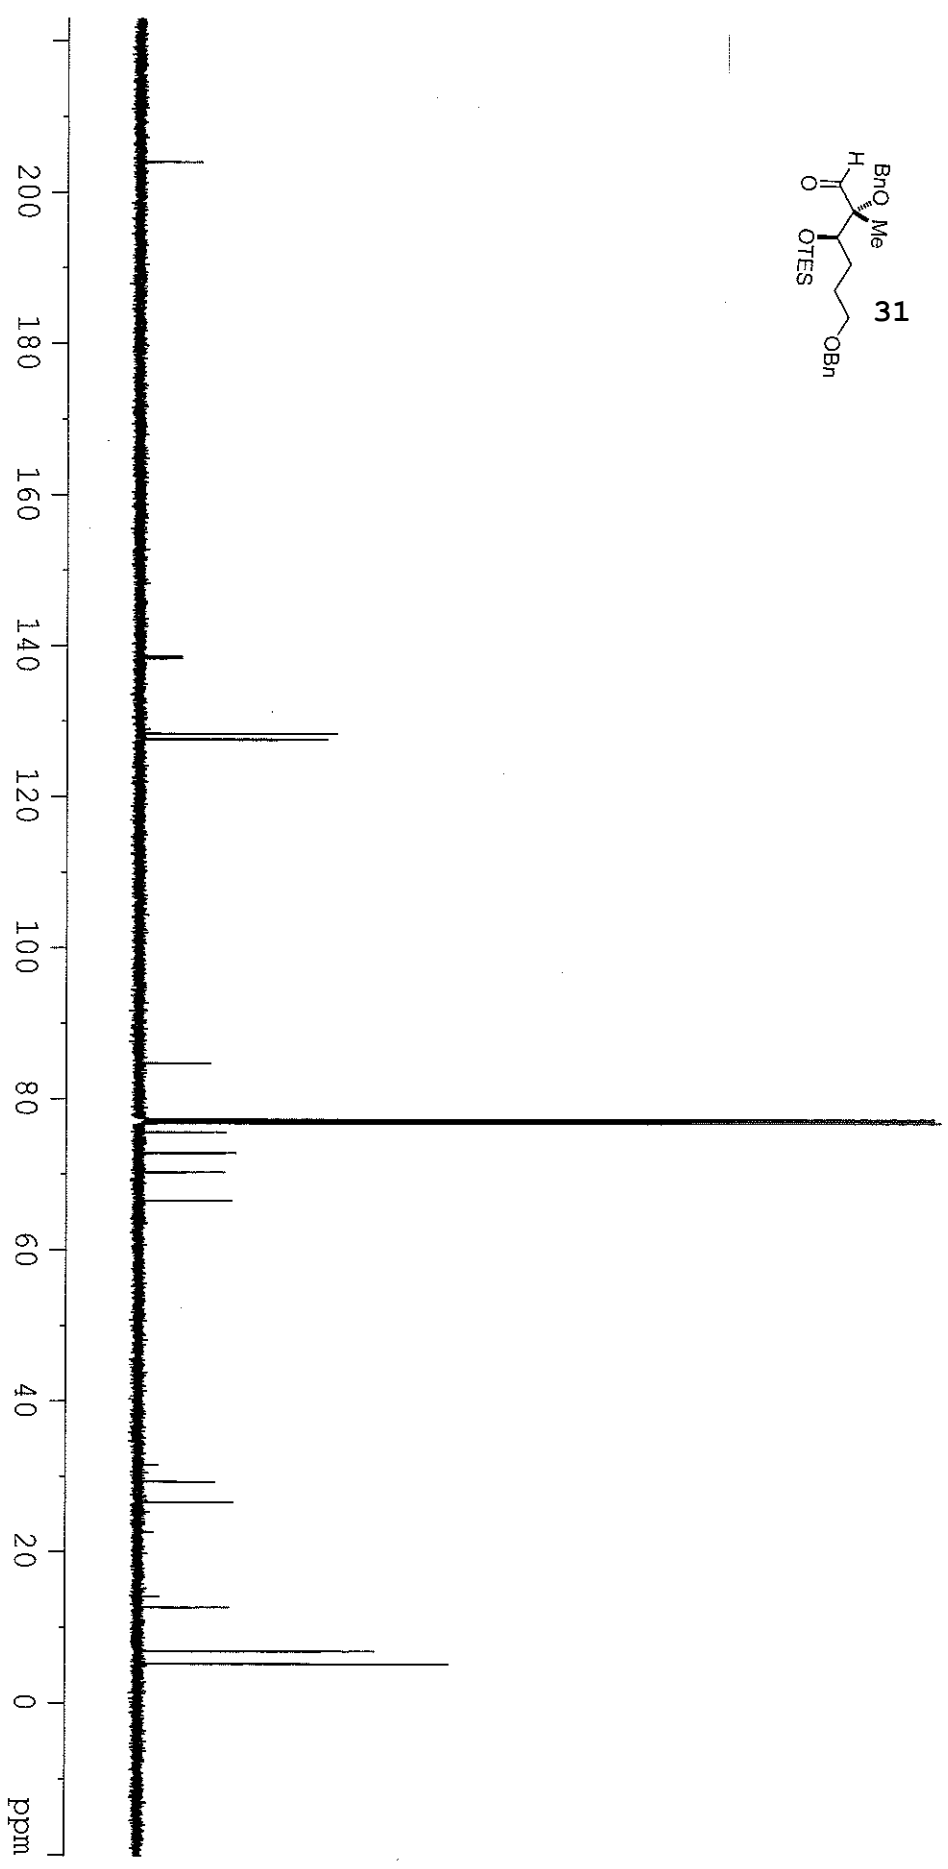

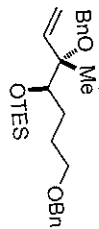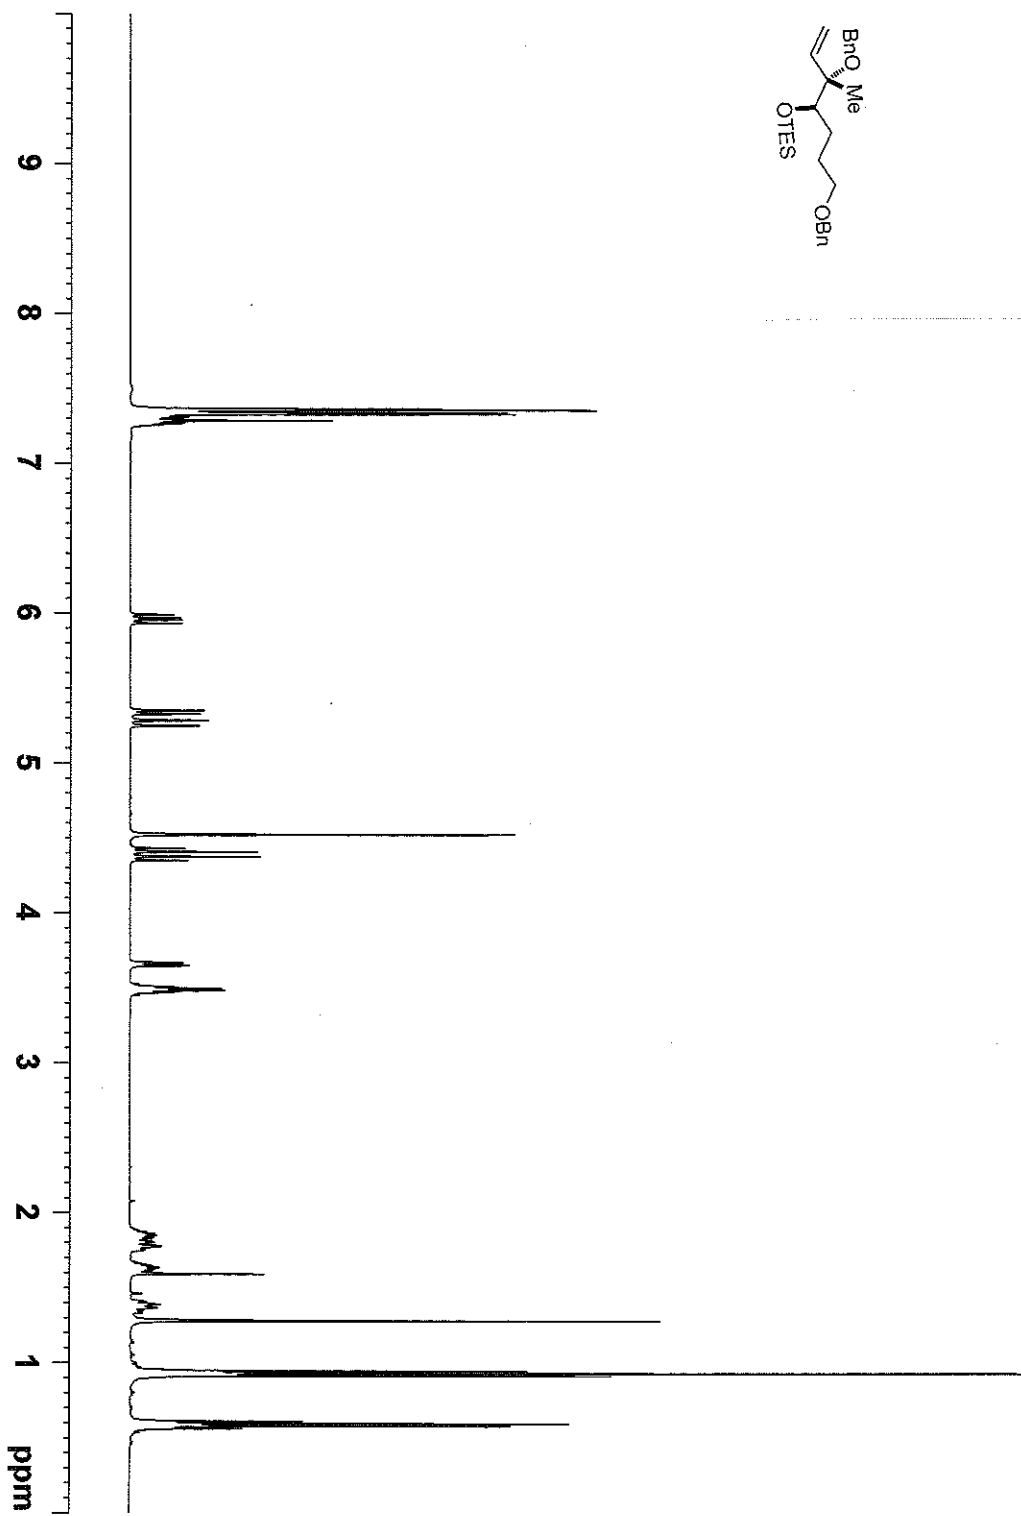

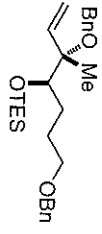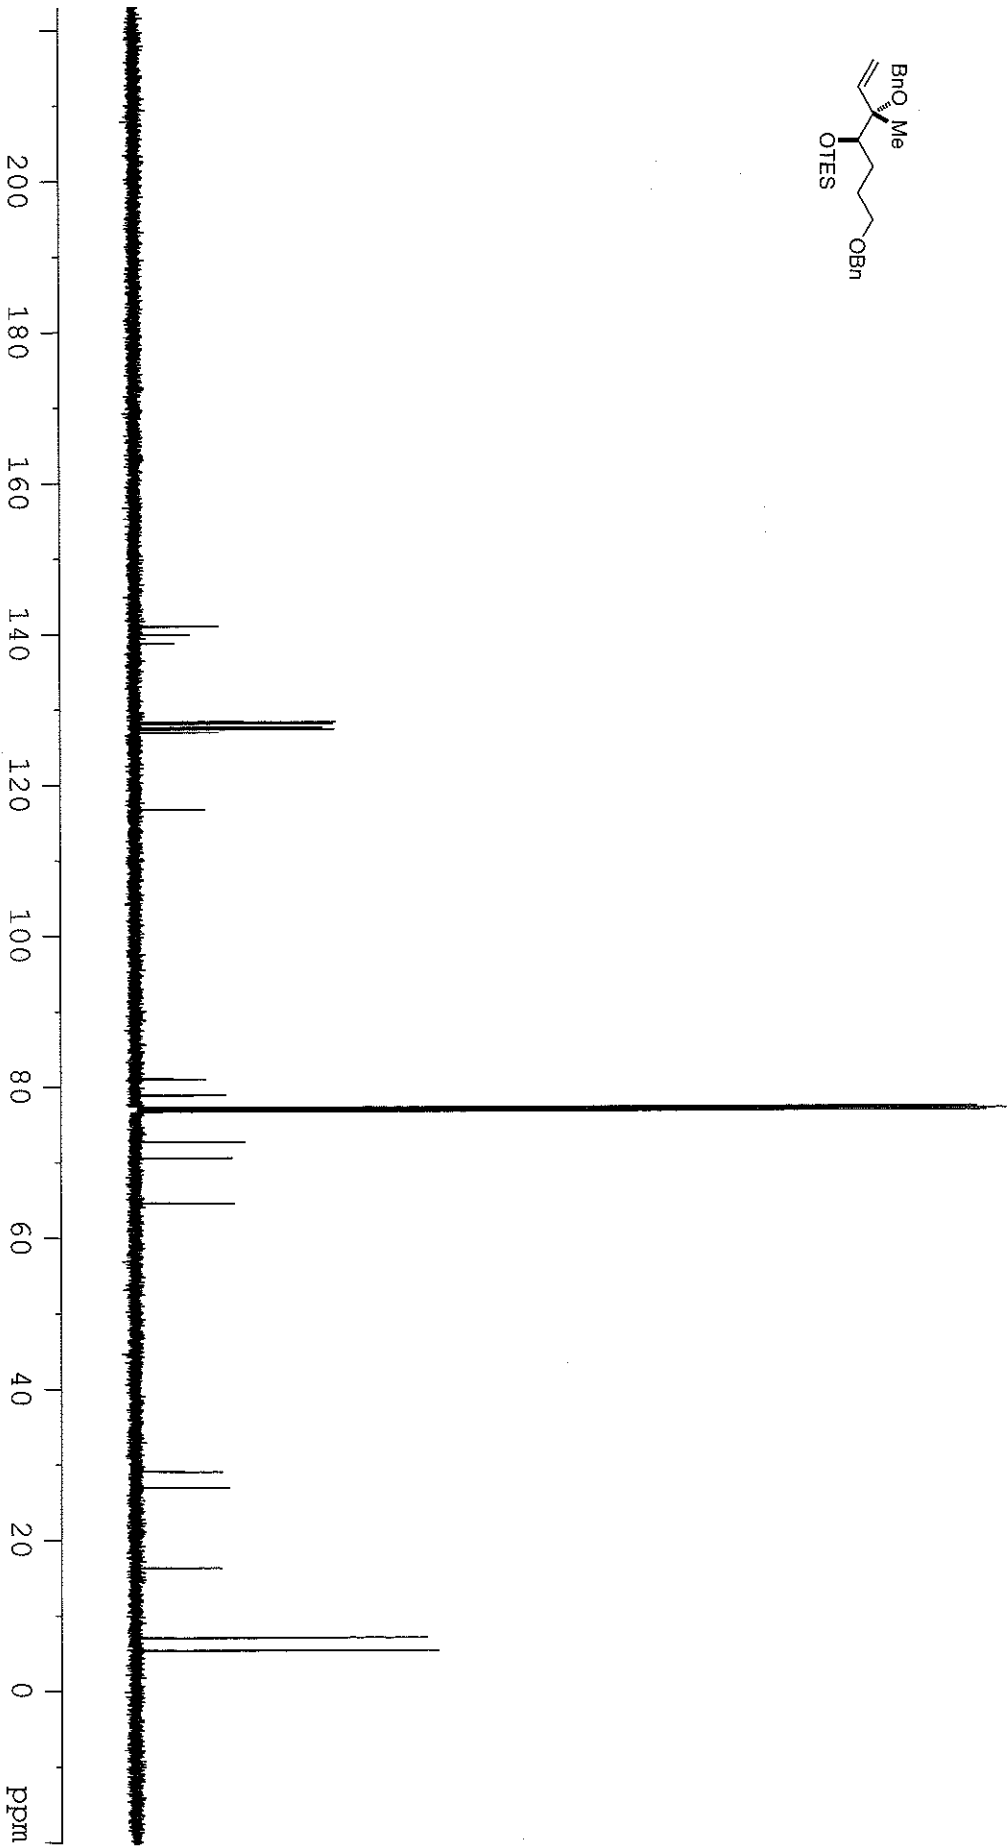

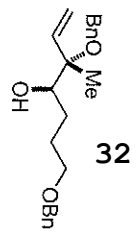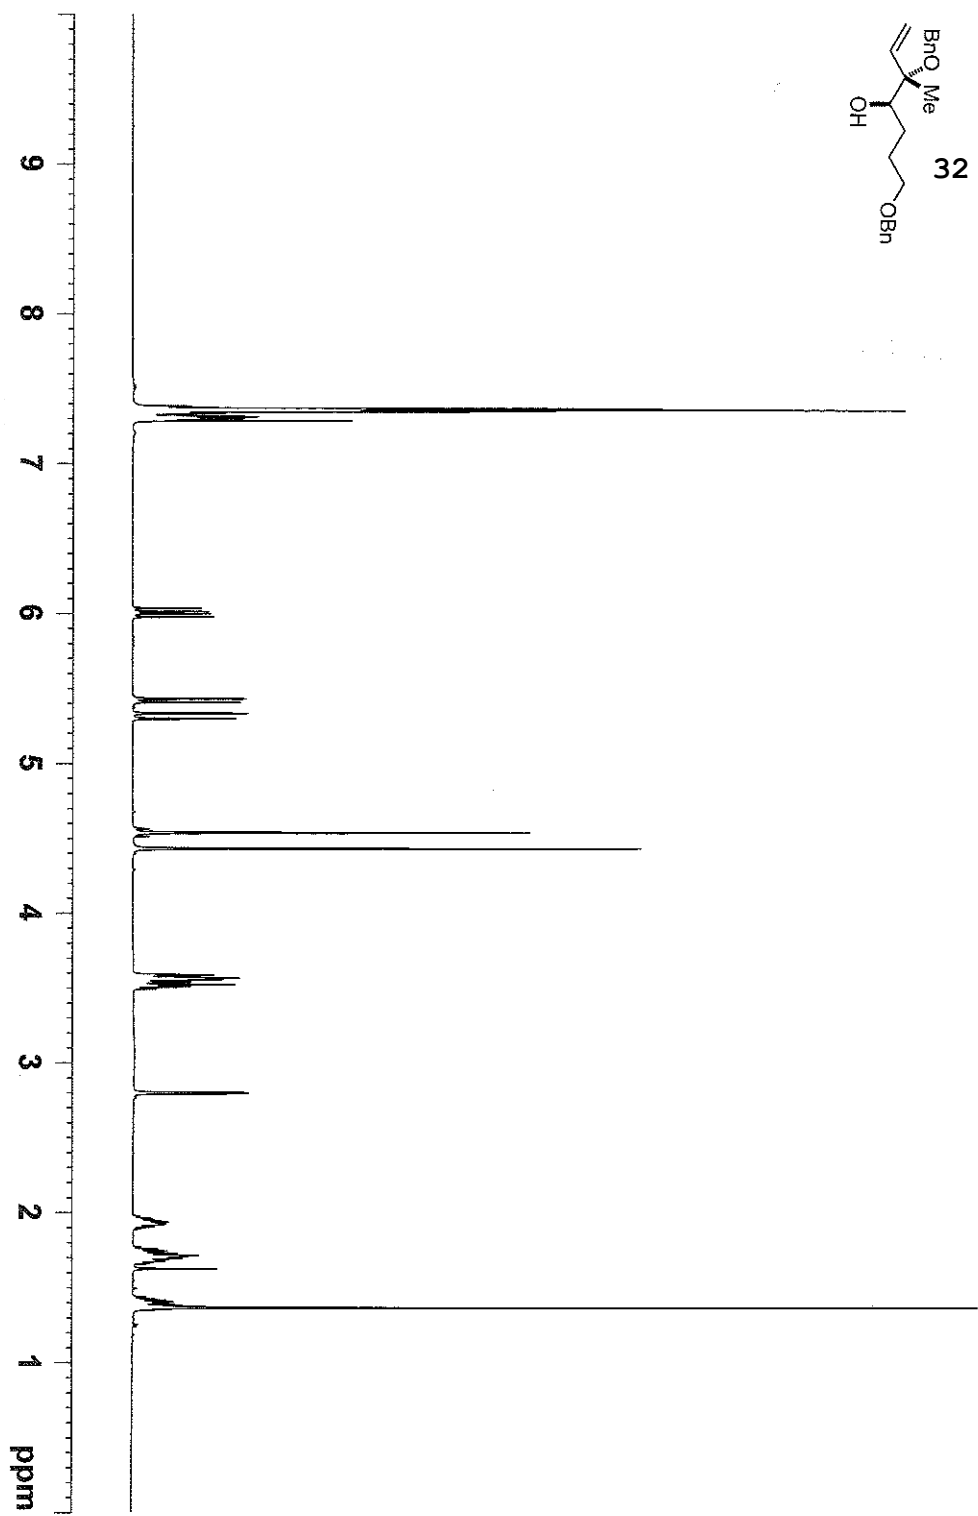

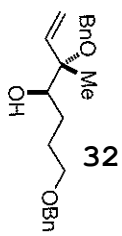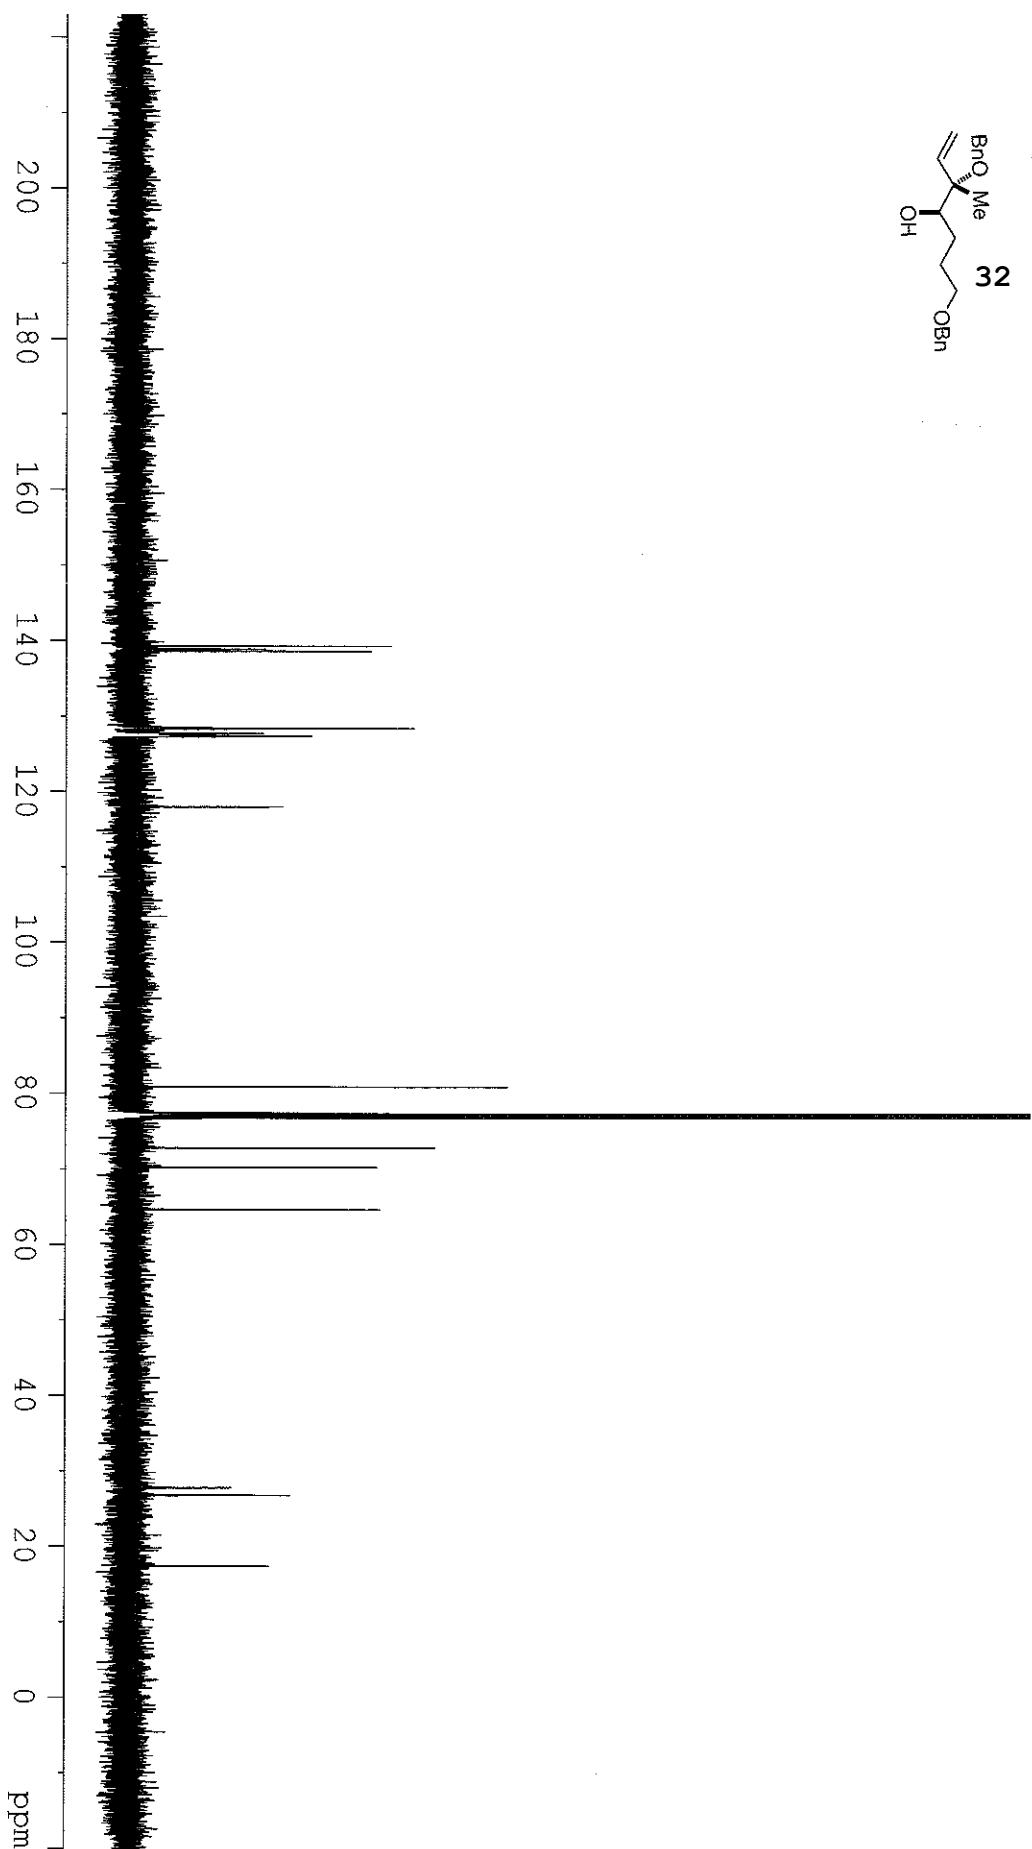

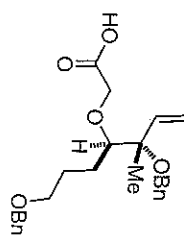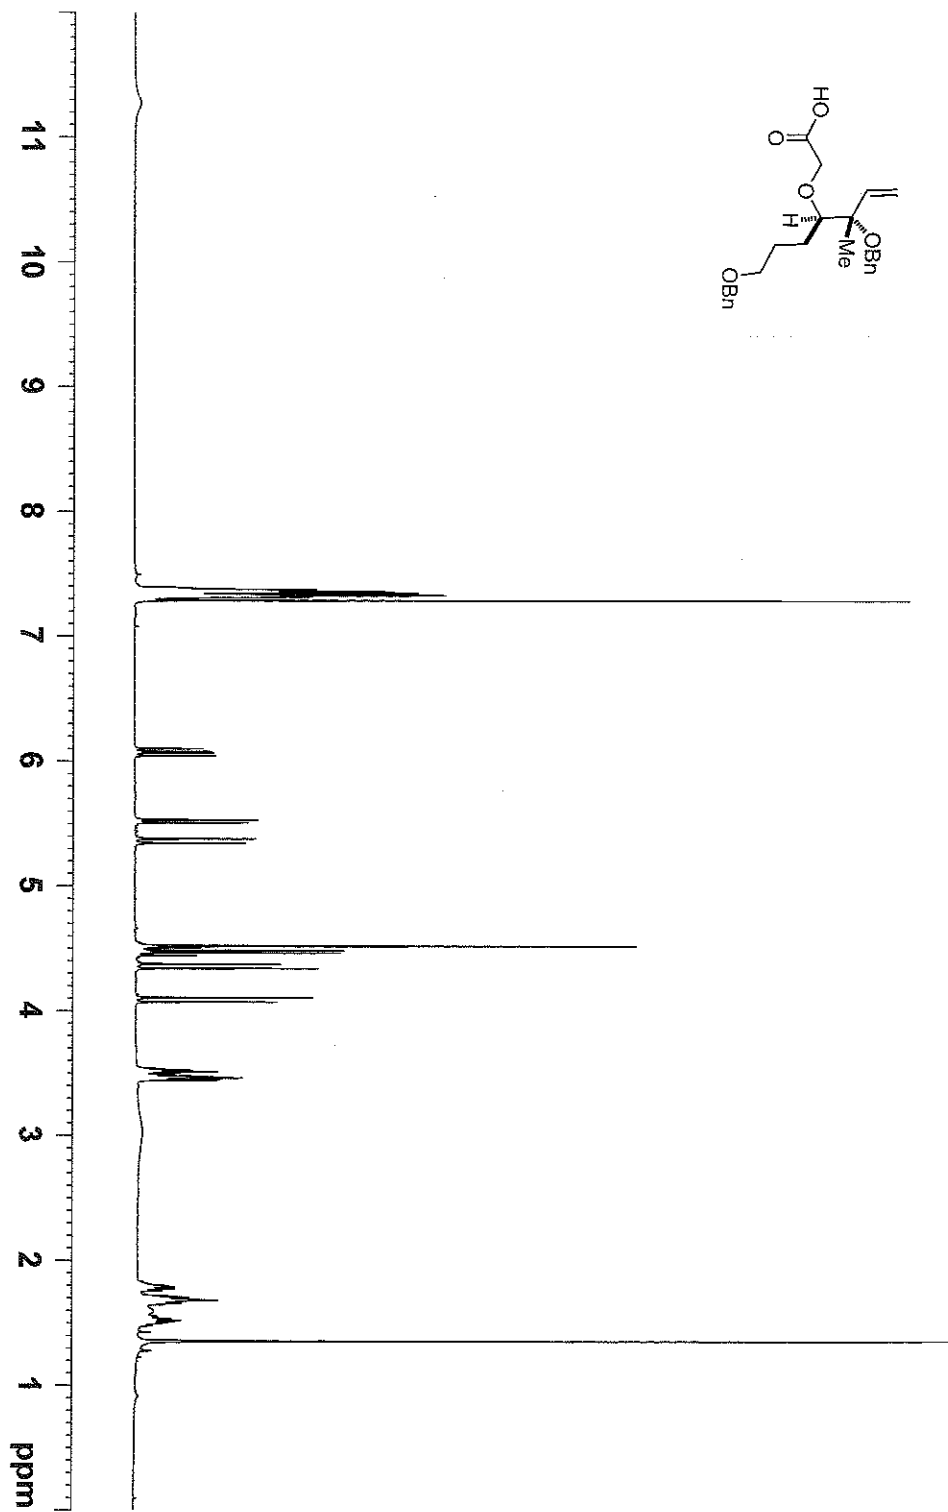

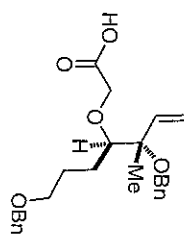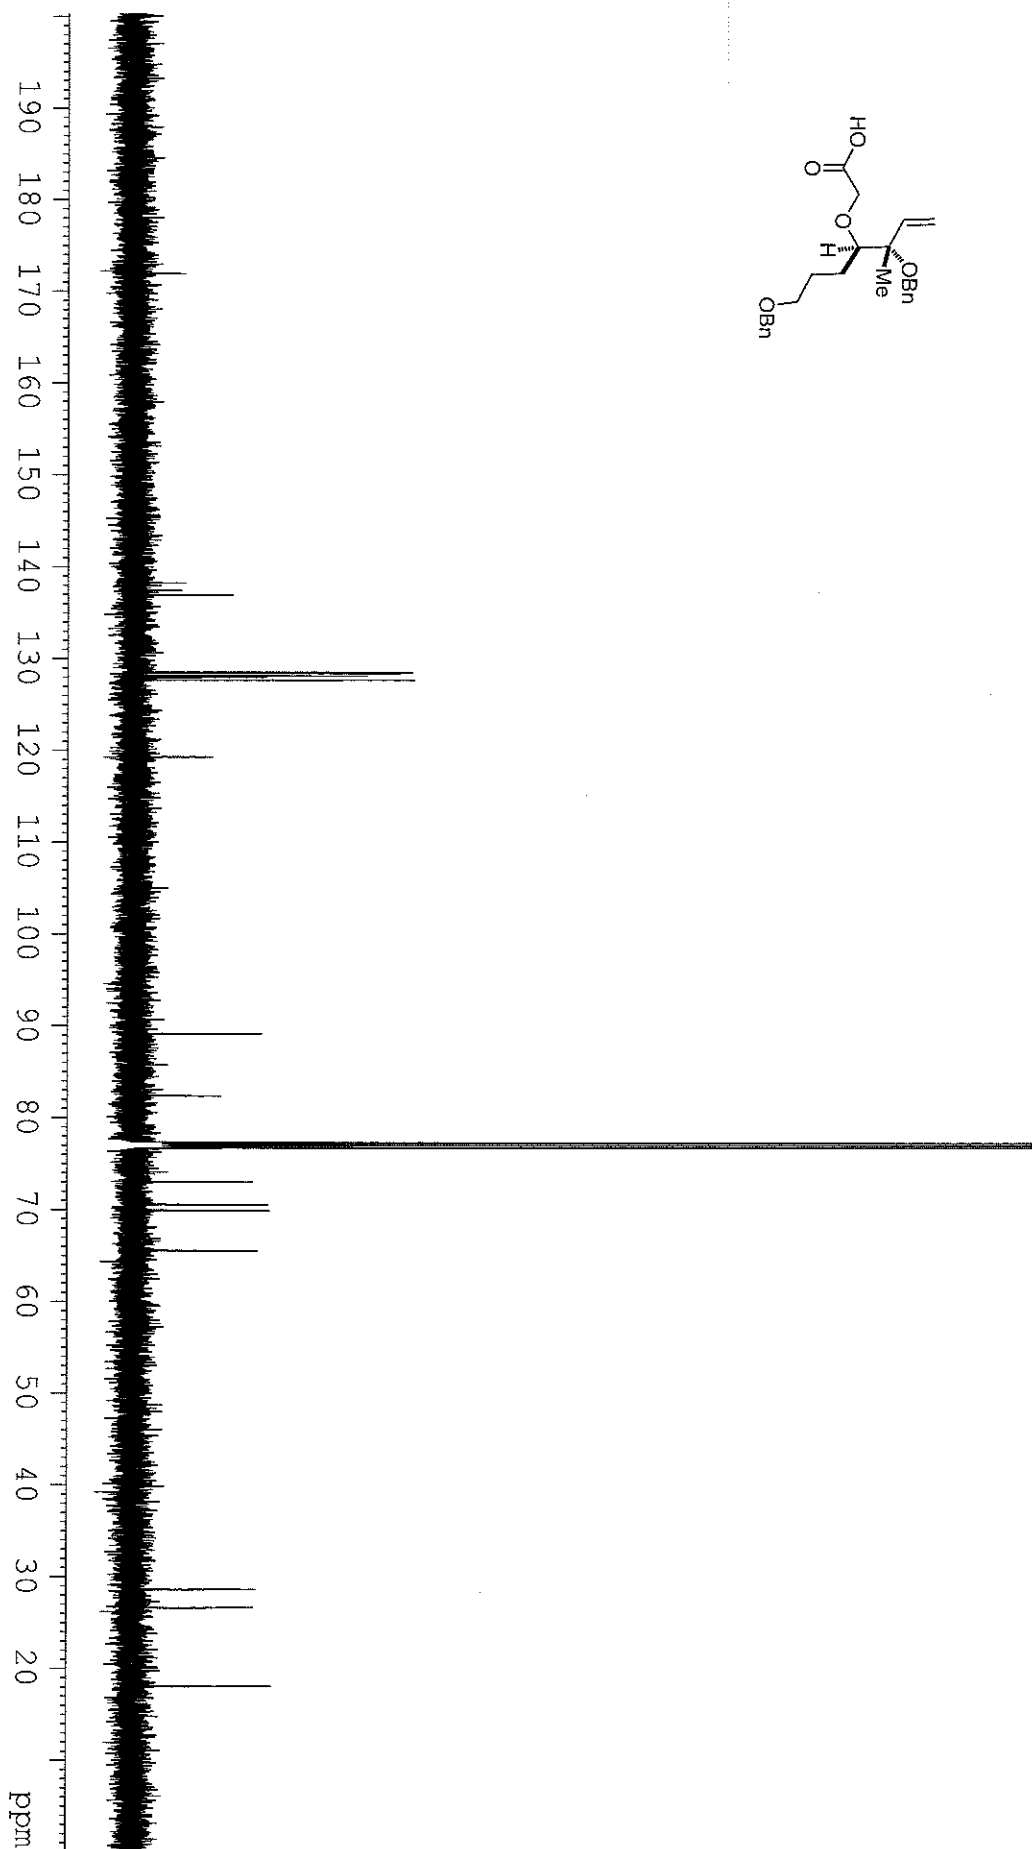

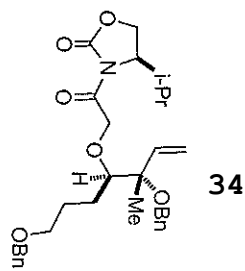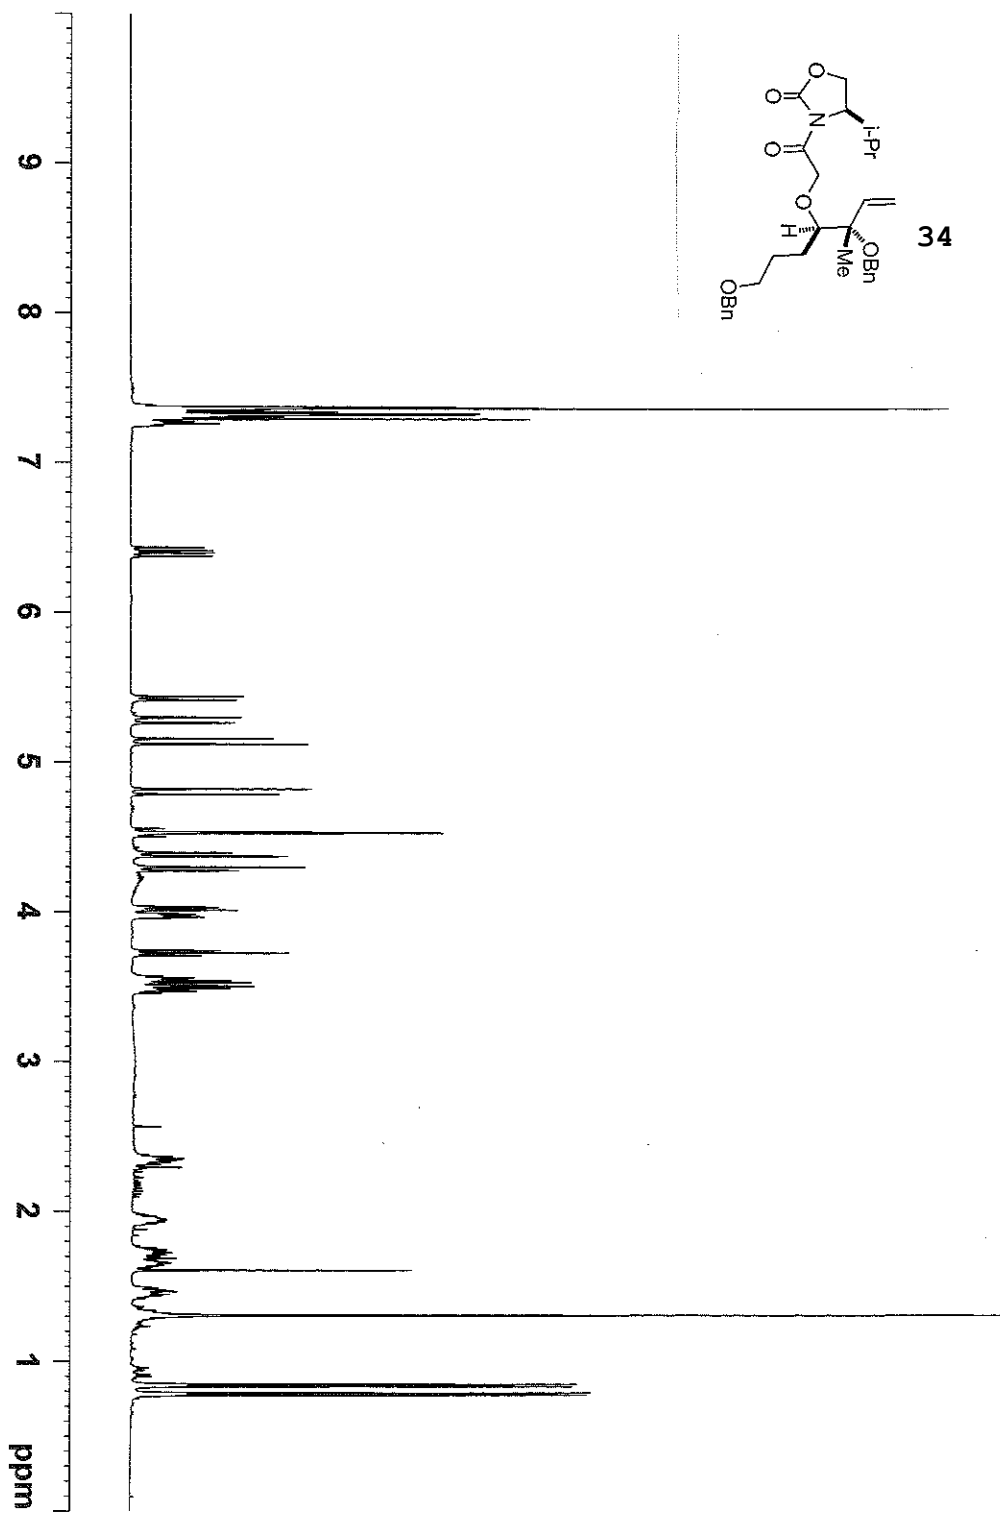



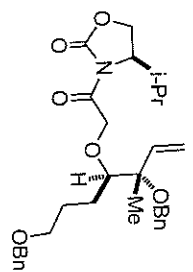

34

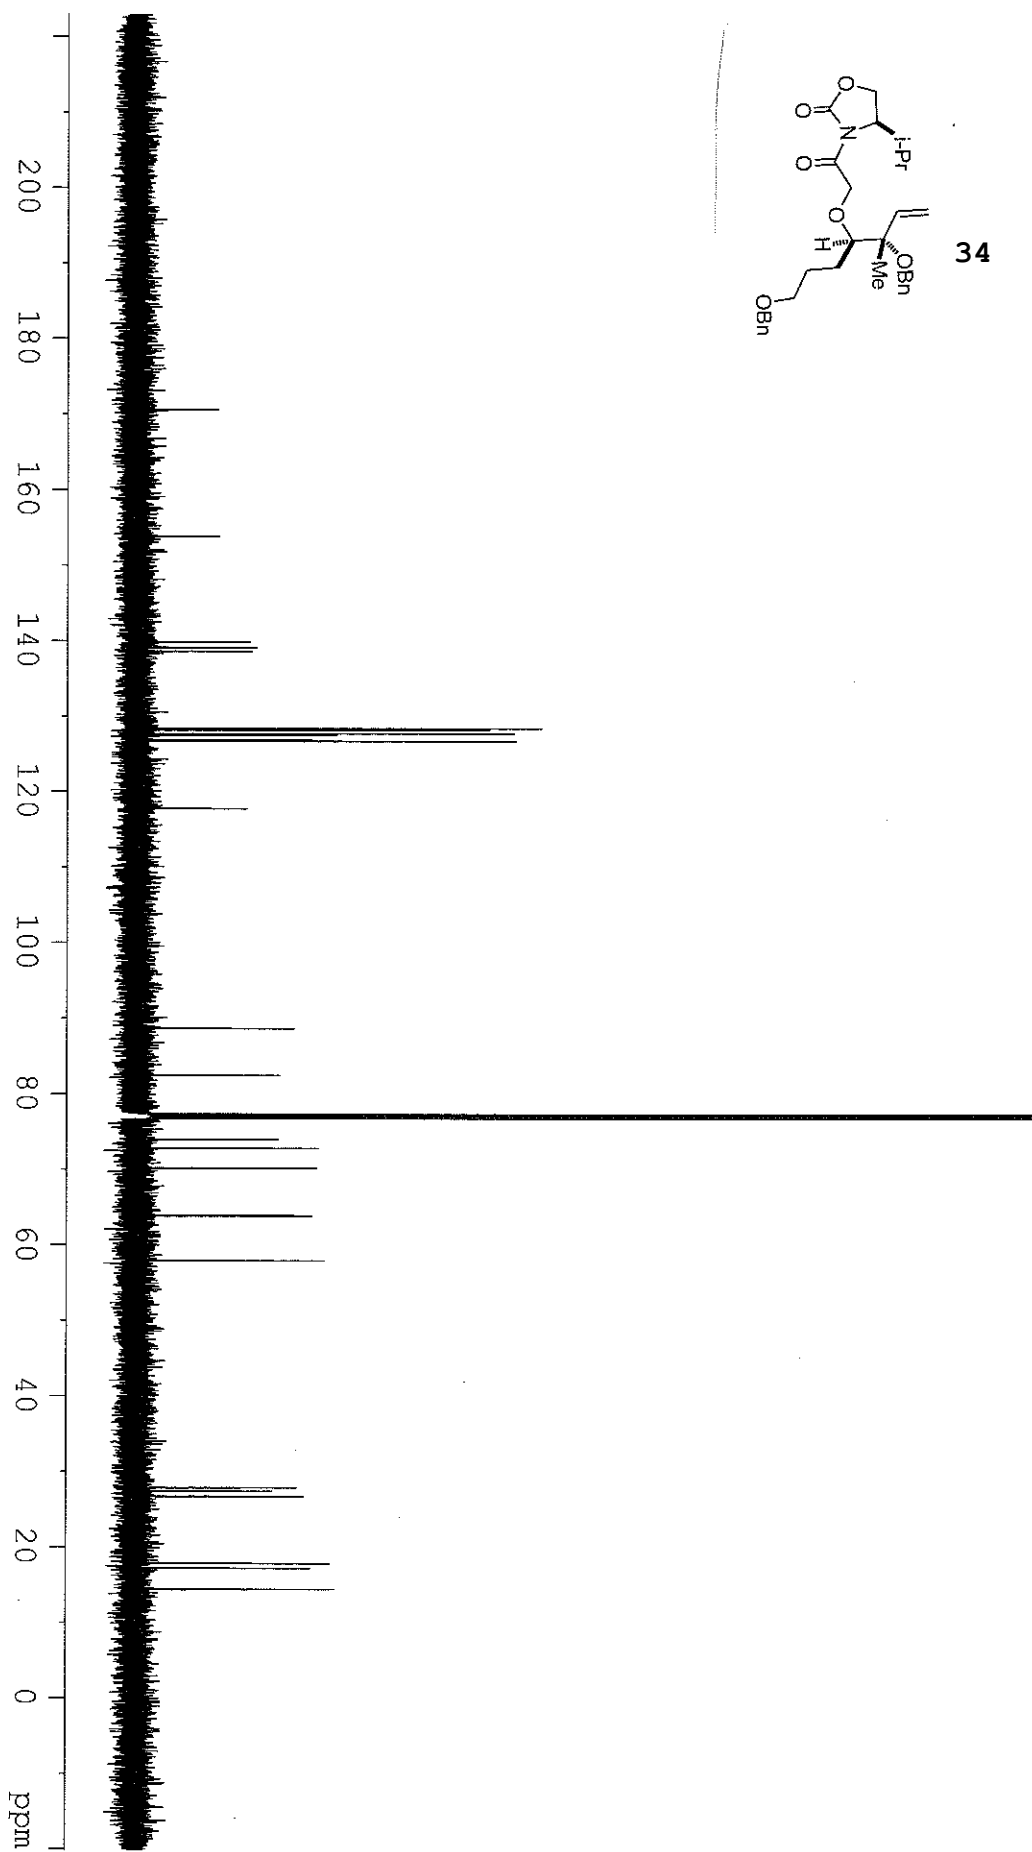

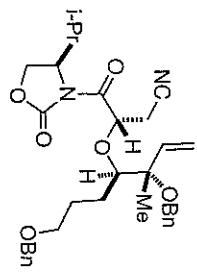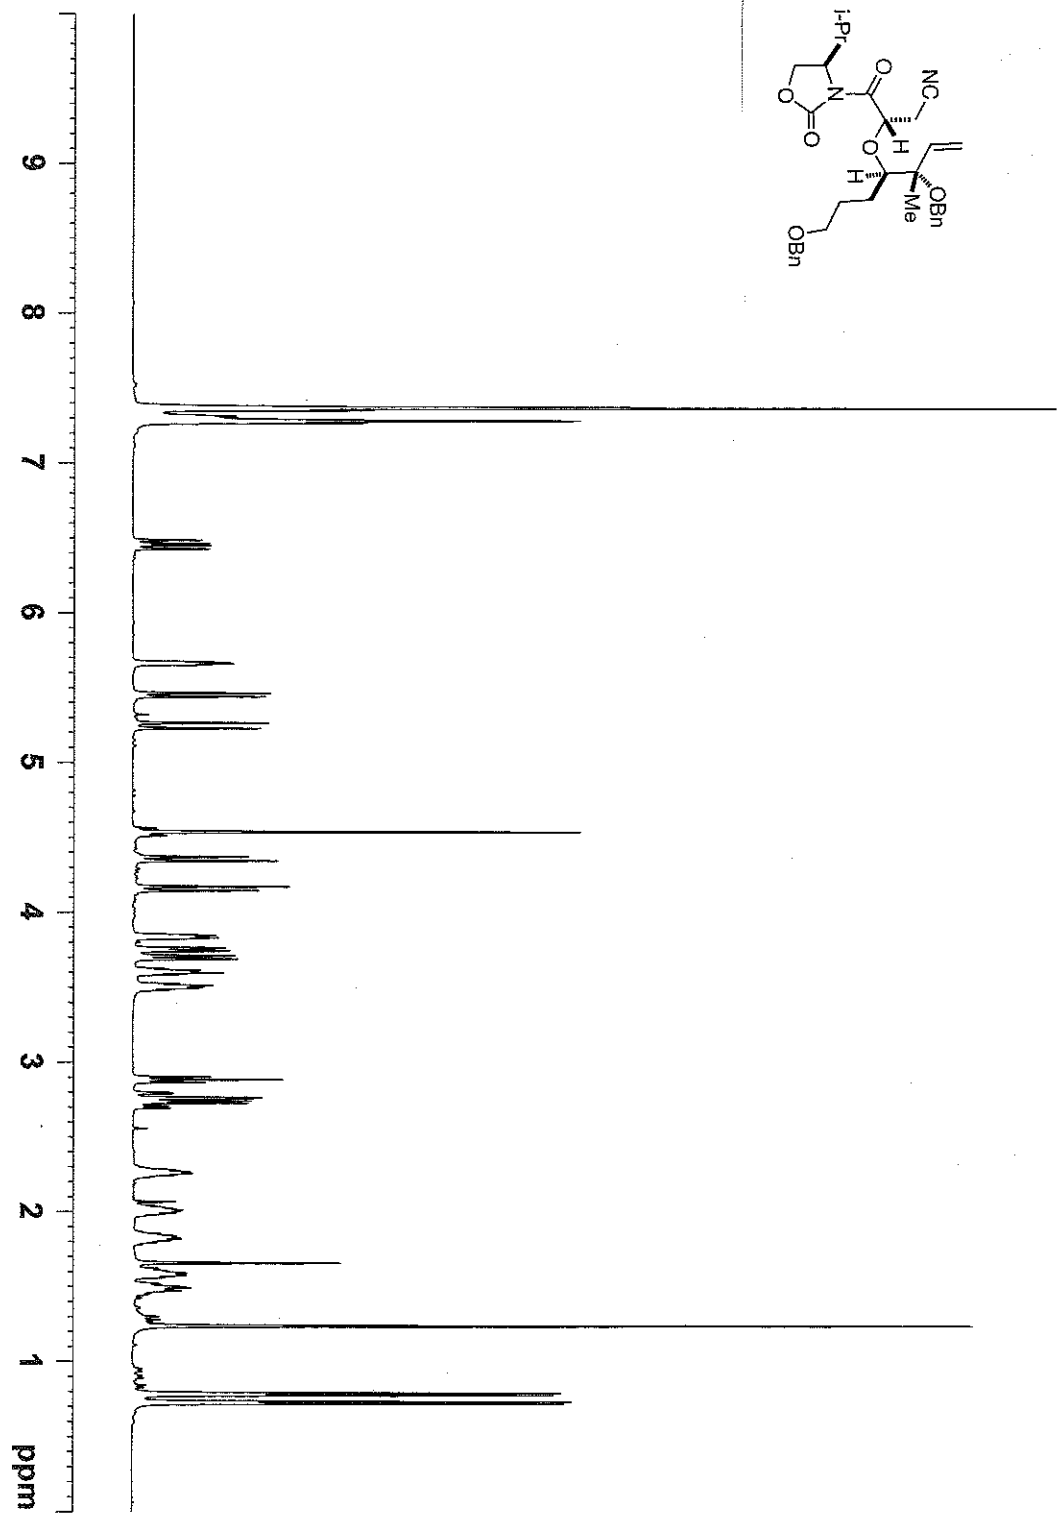

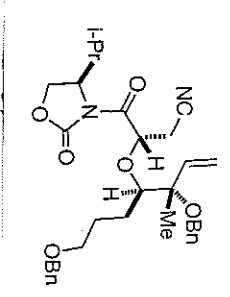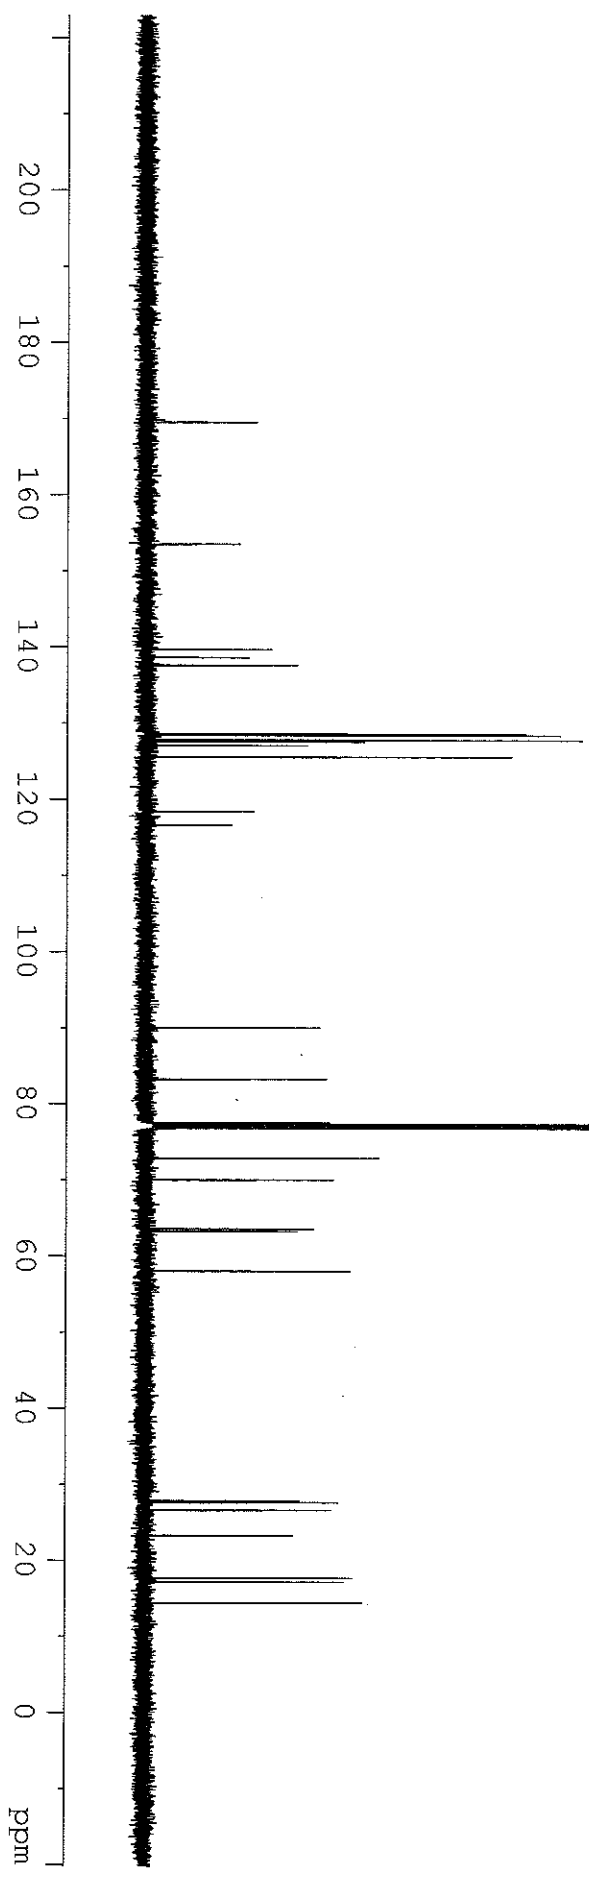

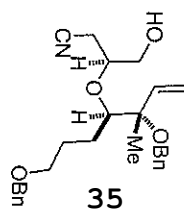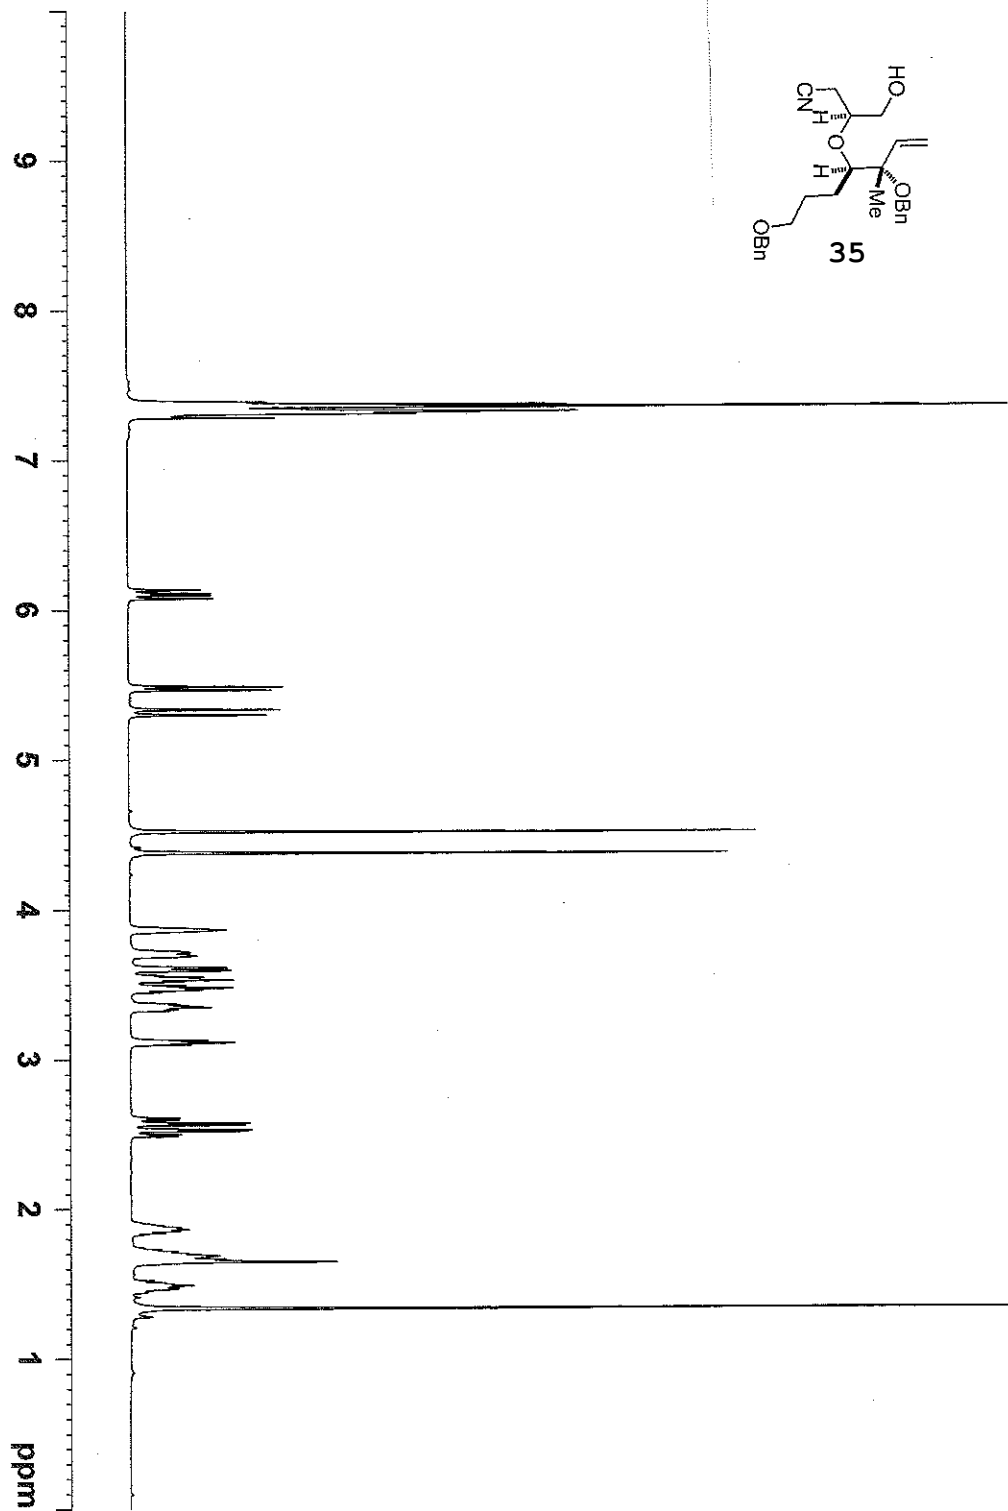

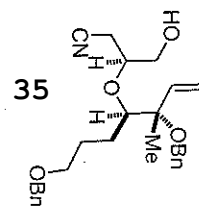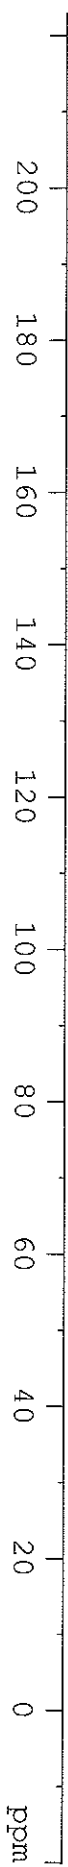

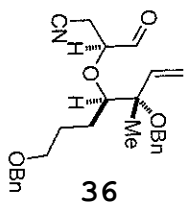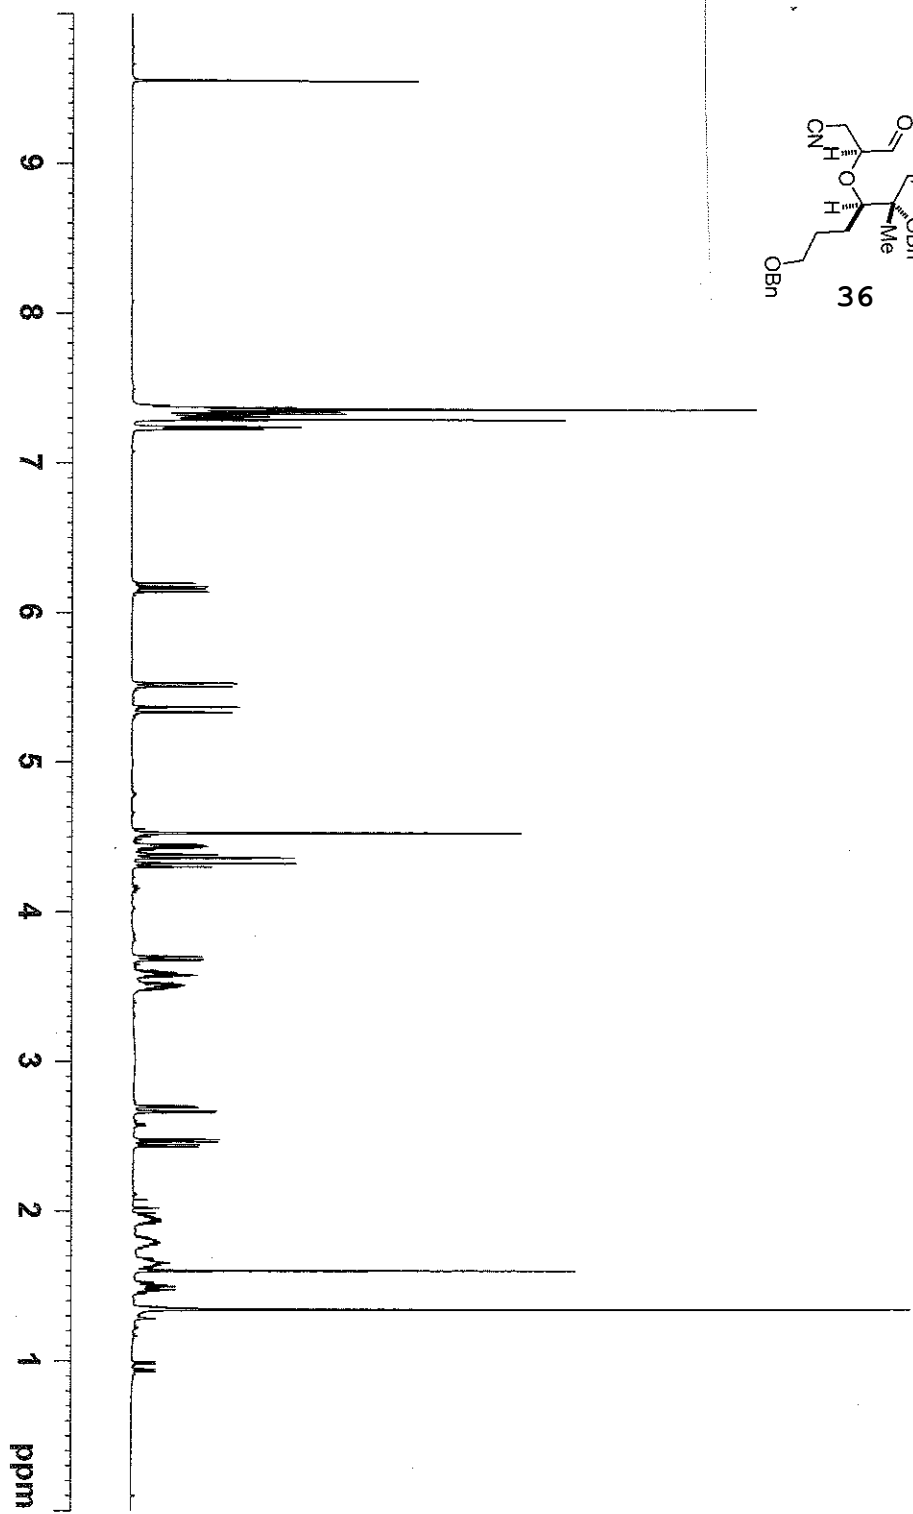

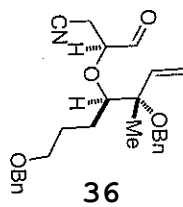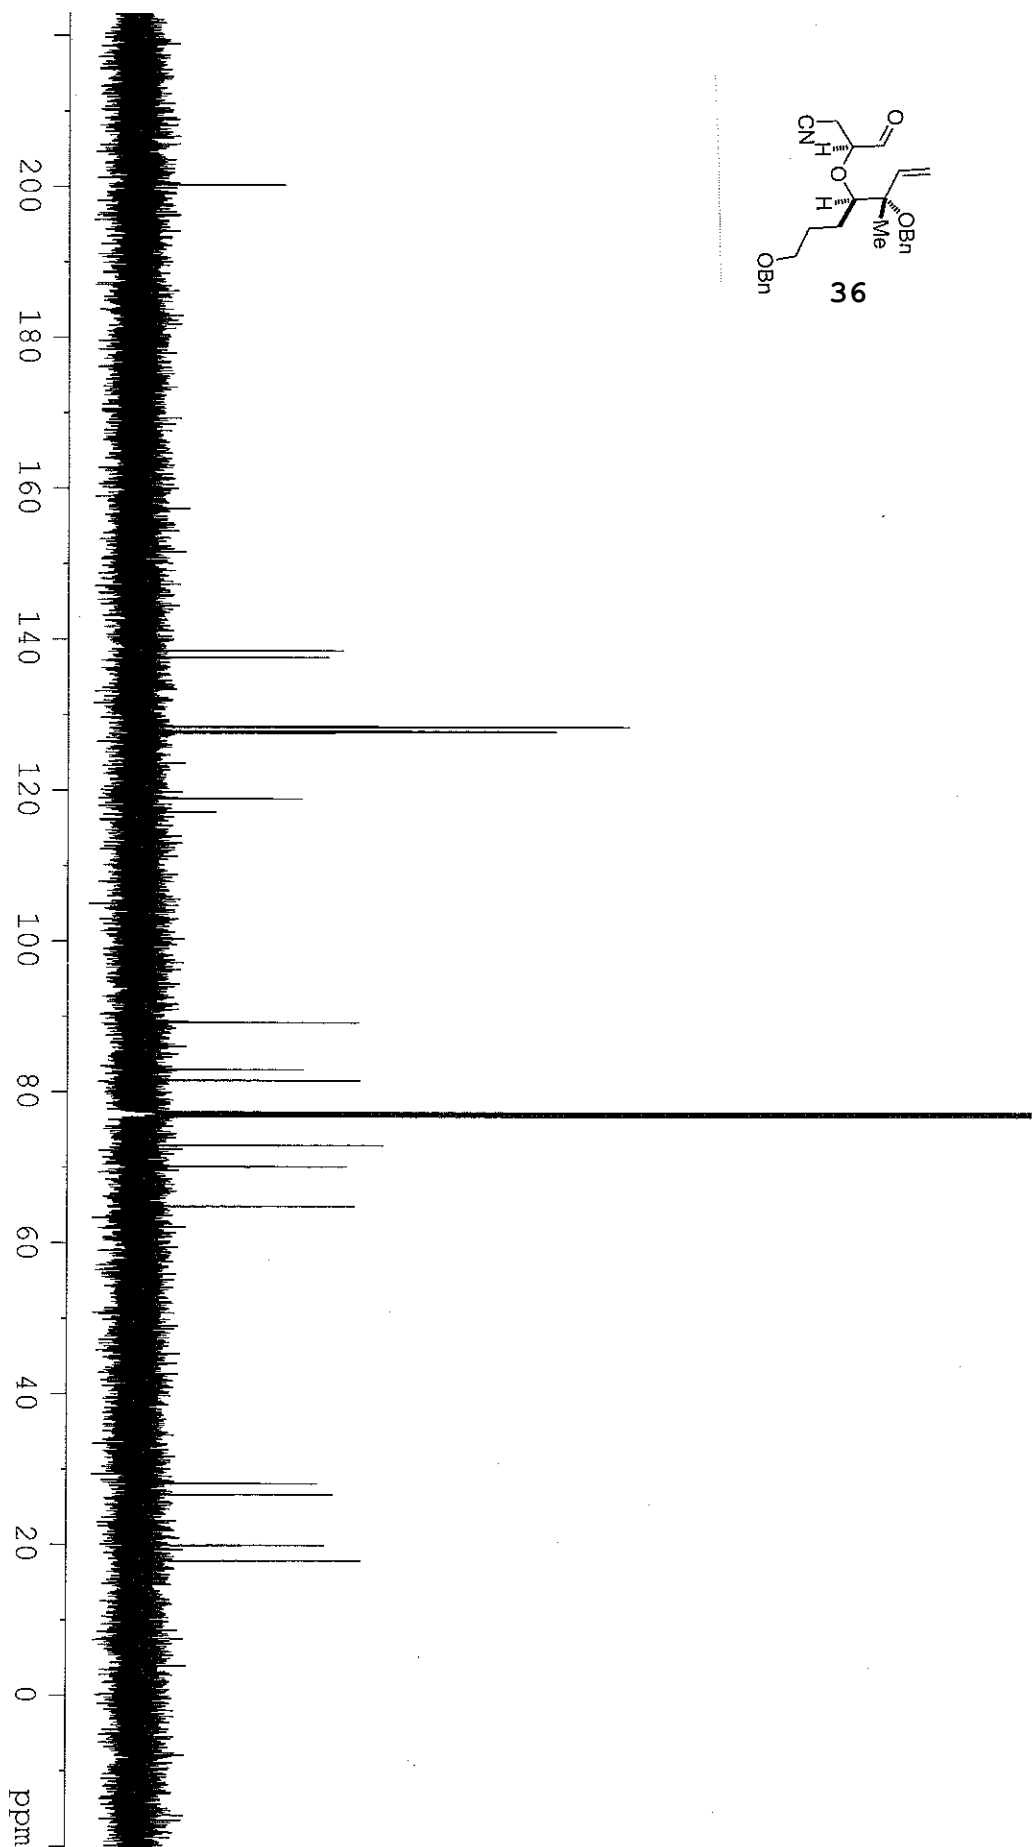

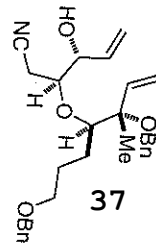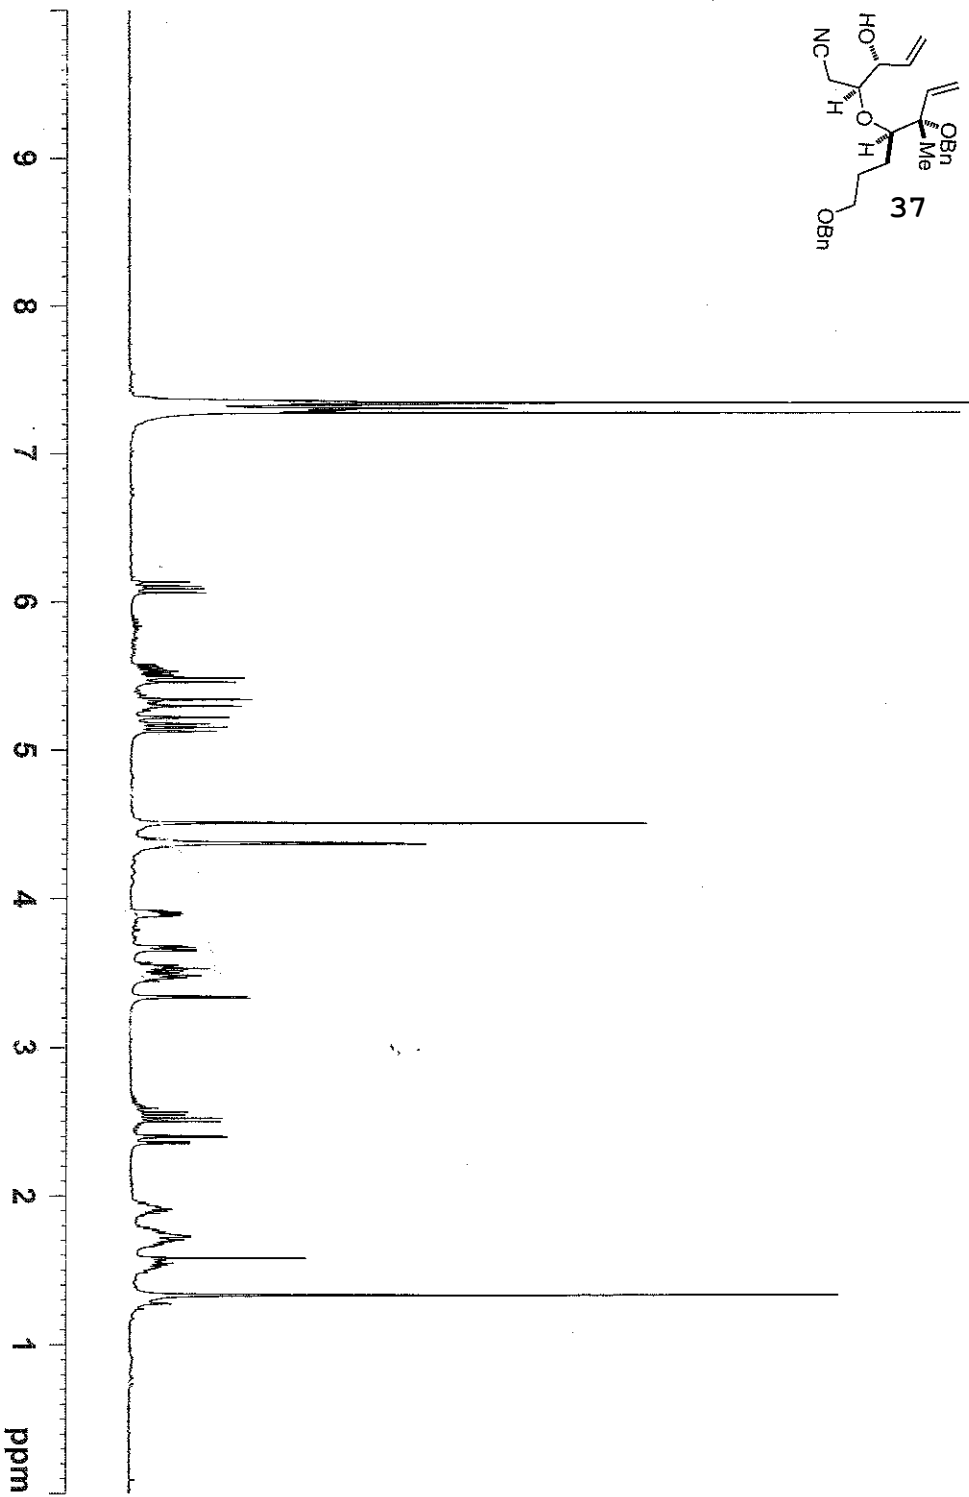



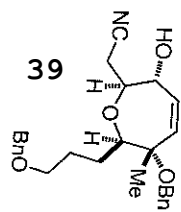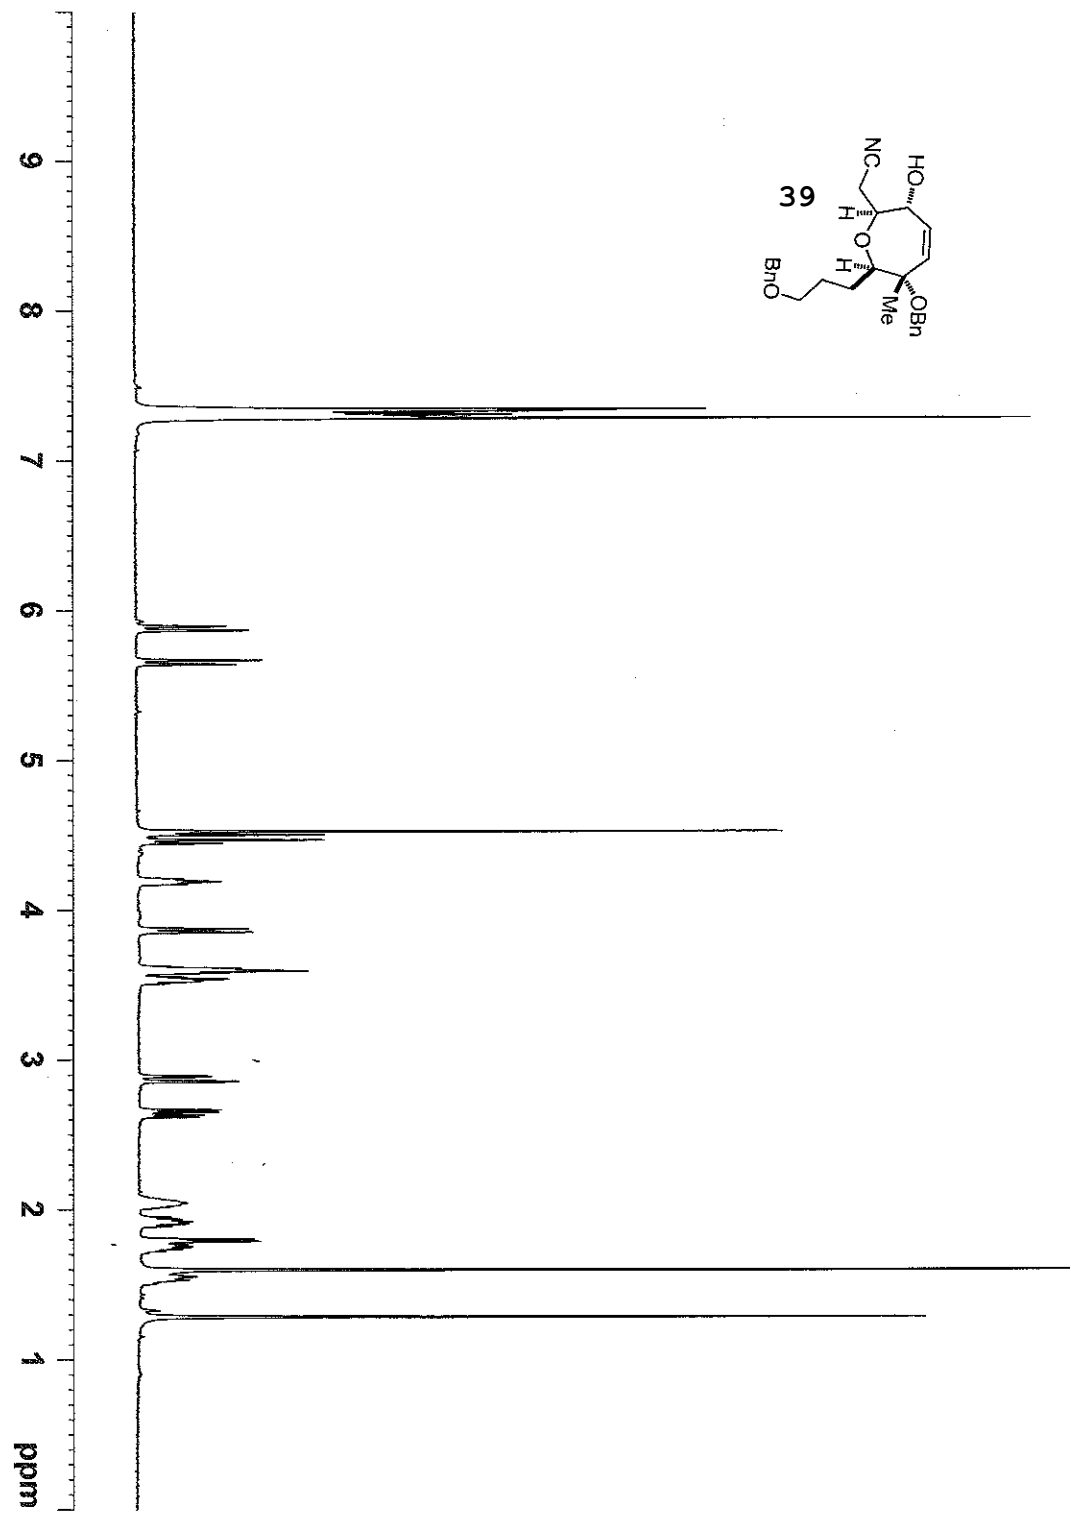

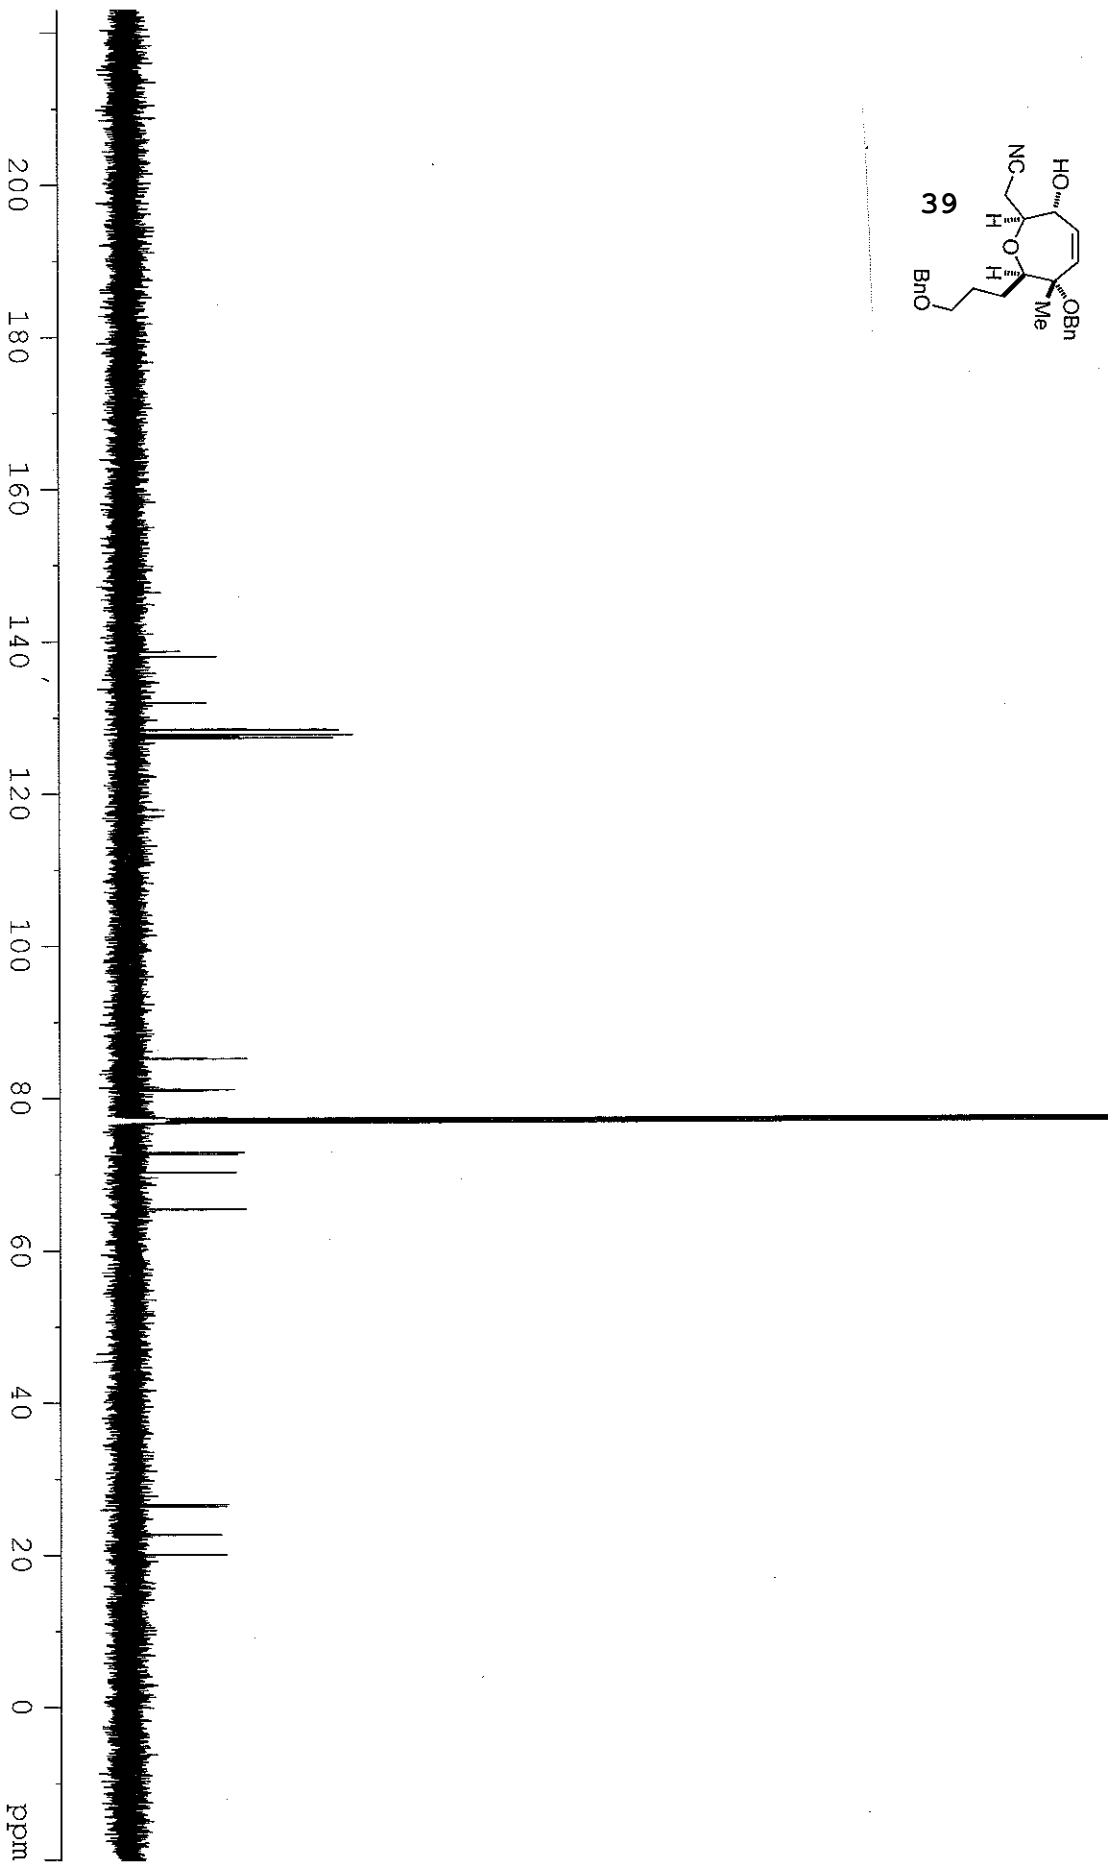

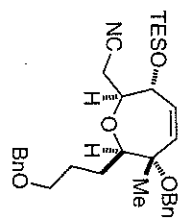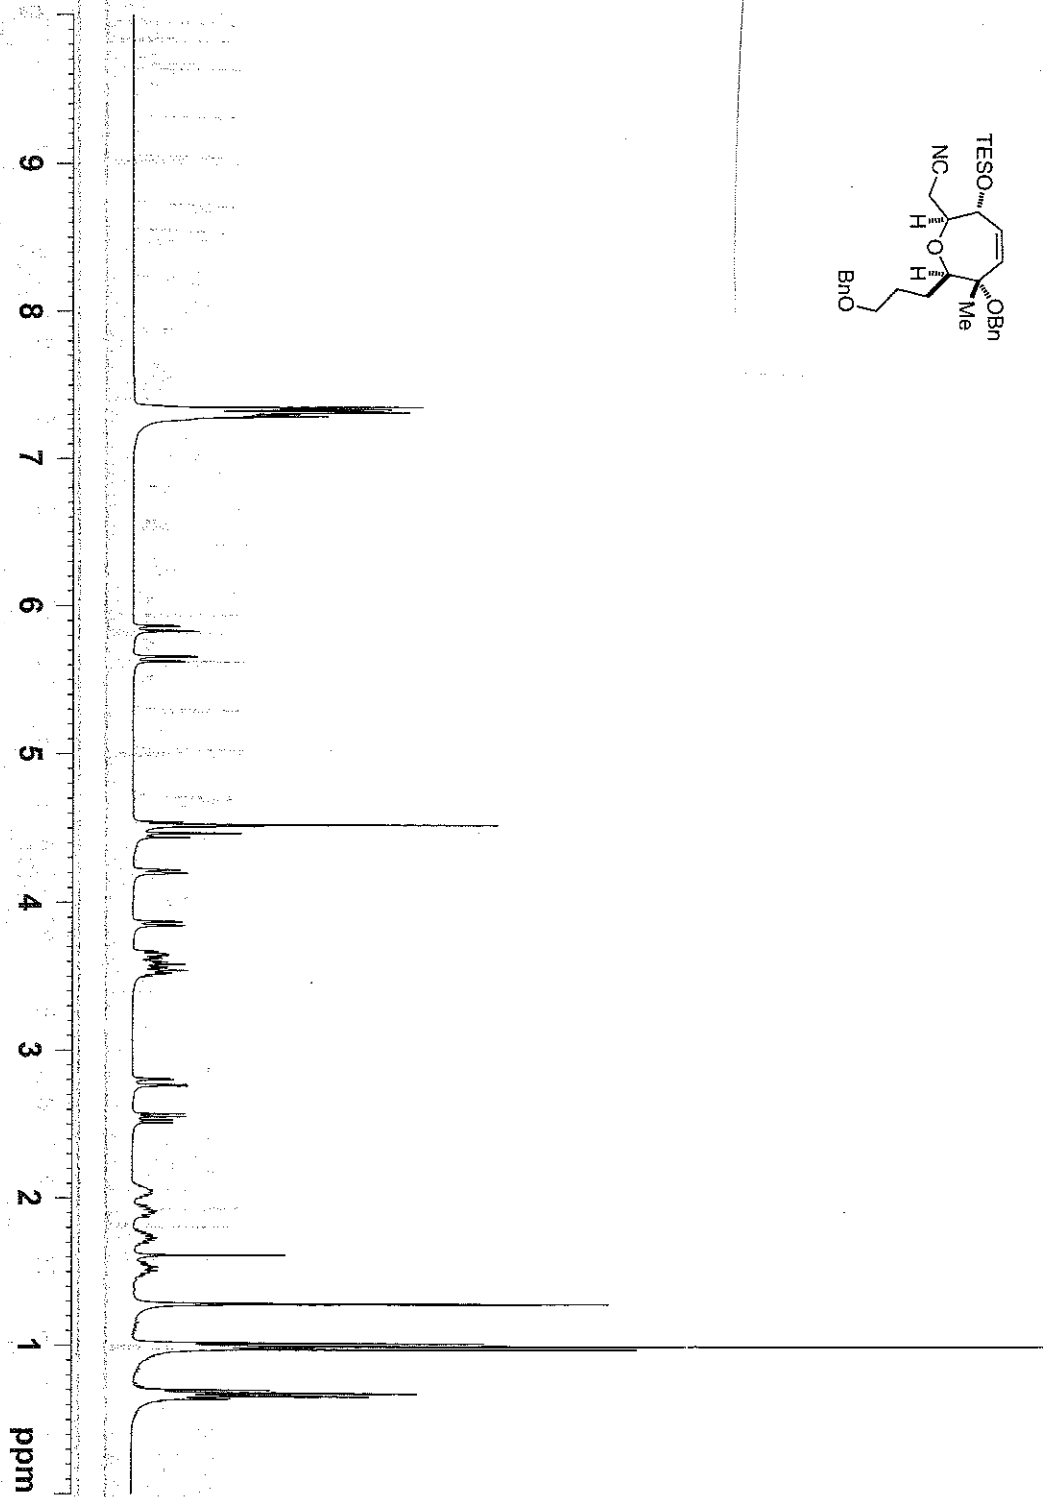

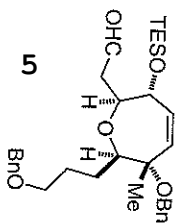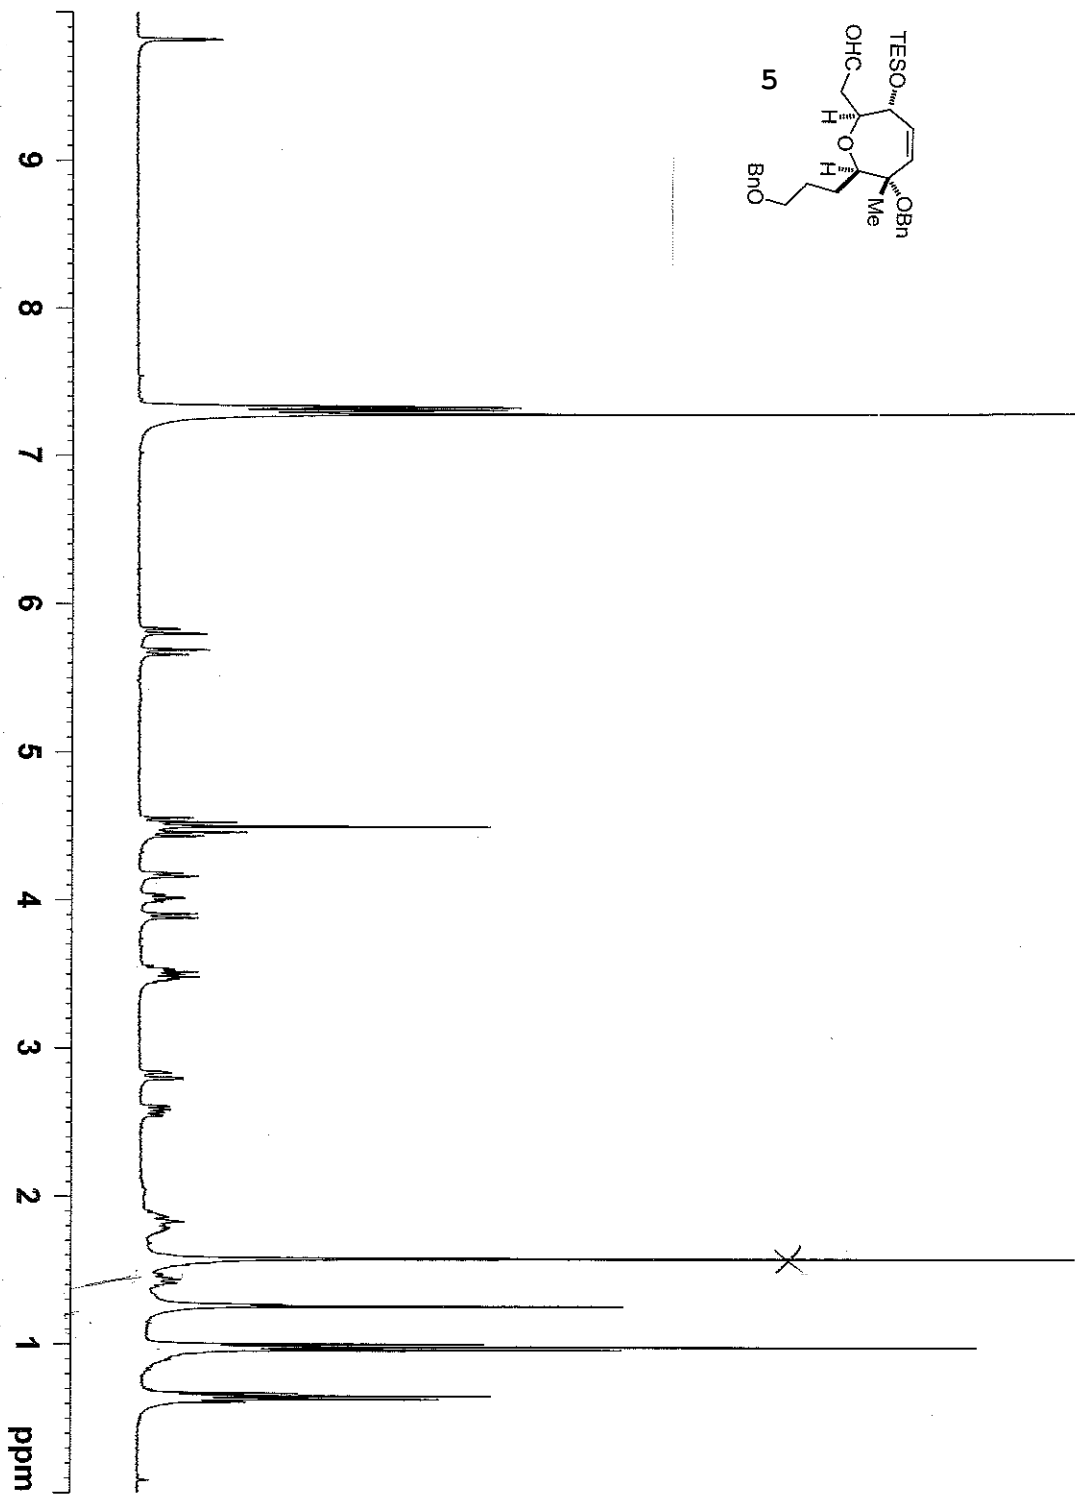

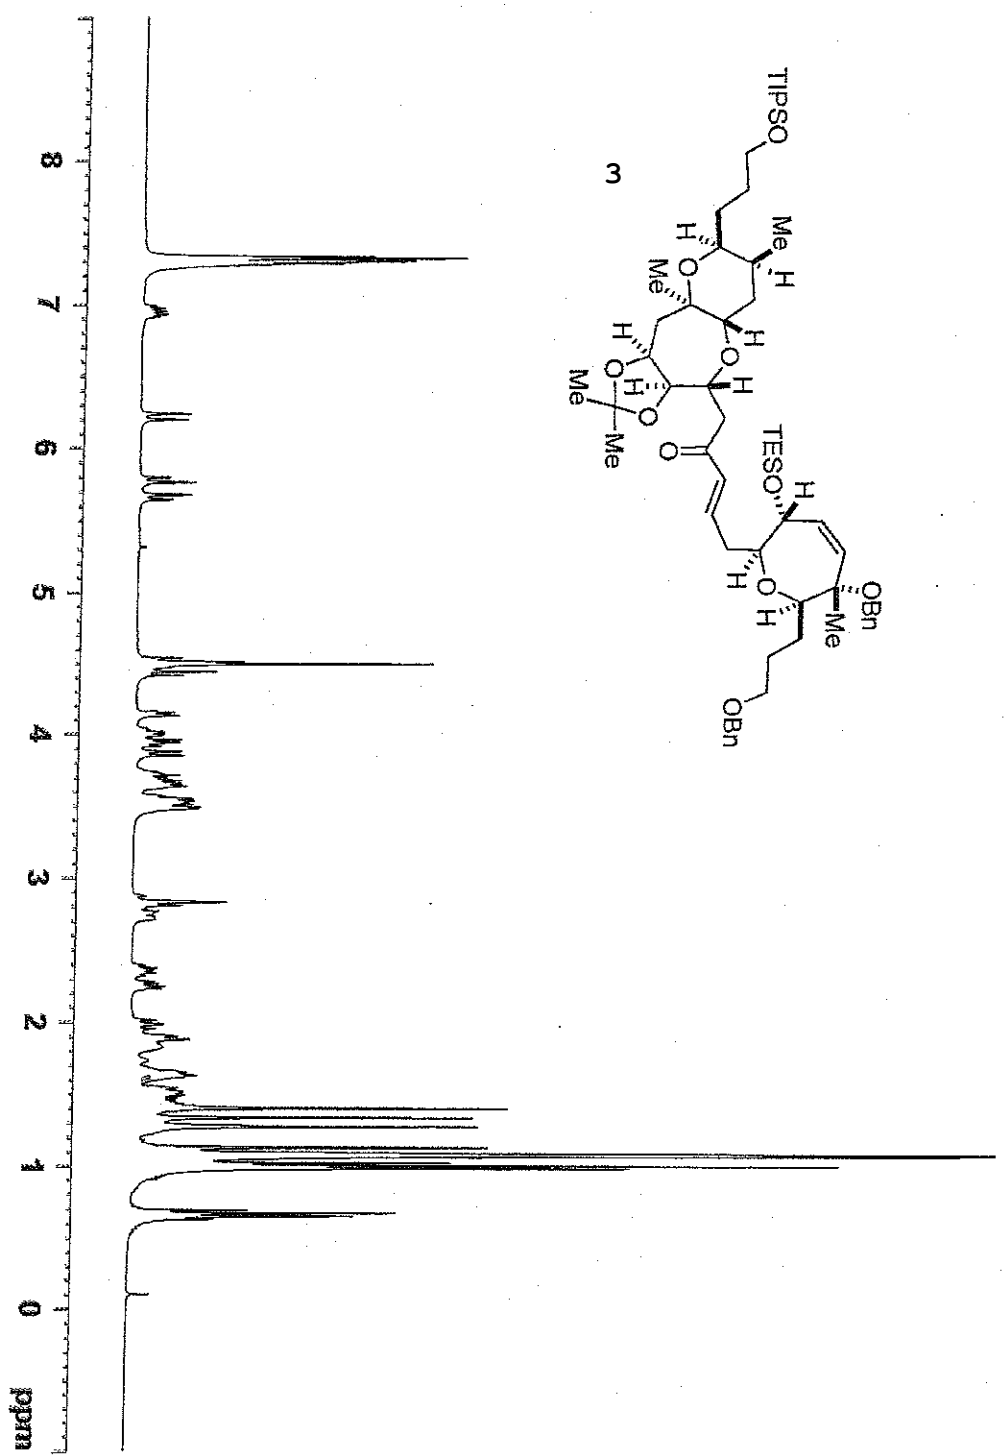

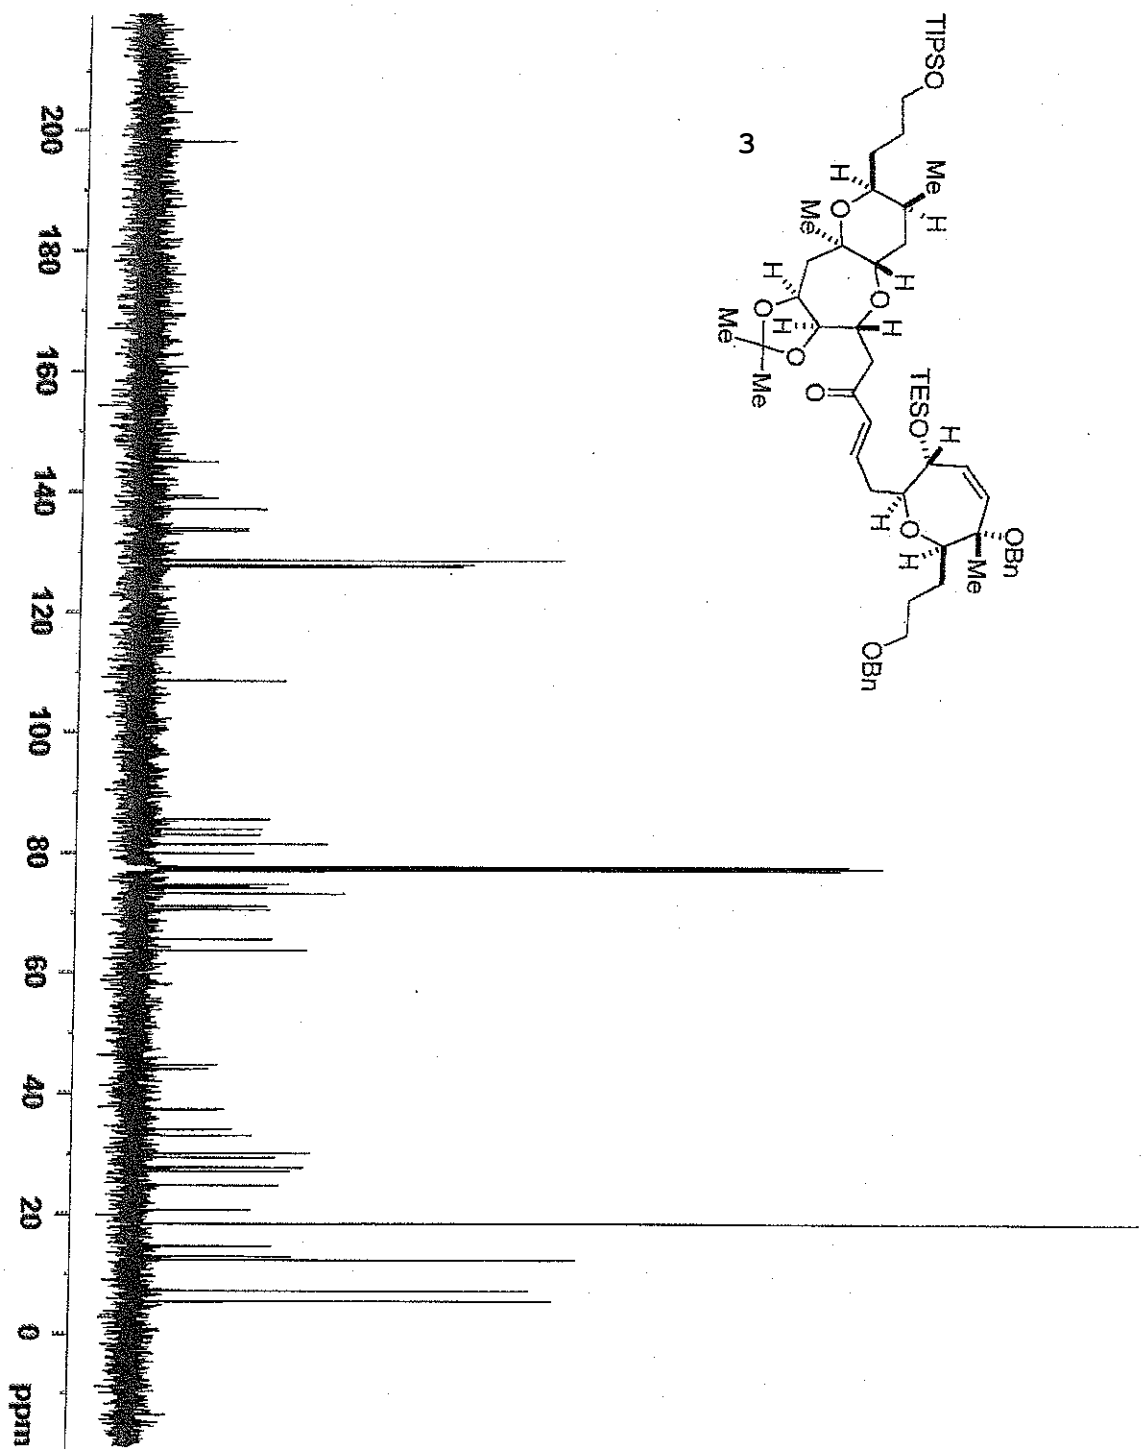

Supplement: NIHMS202995-supplement-1_si_001.pdf [file NIHMS202995-supplement-1_si_001.pdf]
